# Supplementary material for: Integrative Analysis to Identify Genes Associated with Stemness and Immune Infiltration in Glioblastoma
Source: MDPI journal article supplement (doi:10.3390/cells10102765), 2021-10-15
Supplement: s1 [file s1]

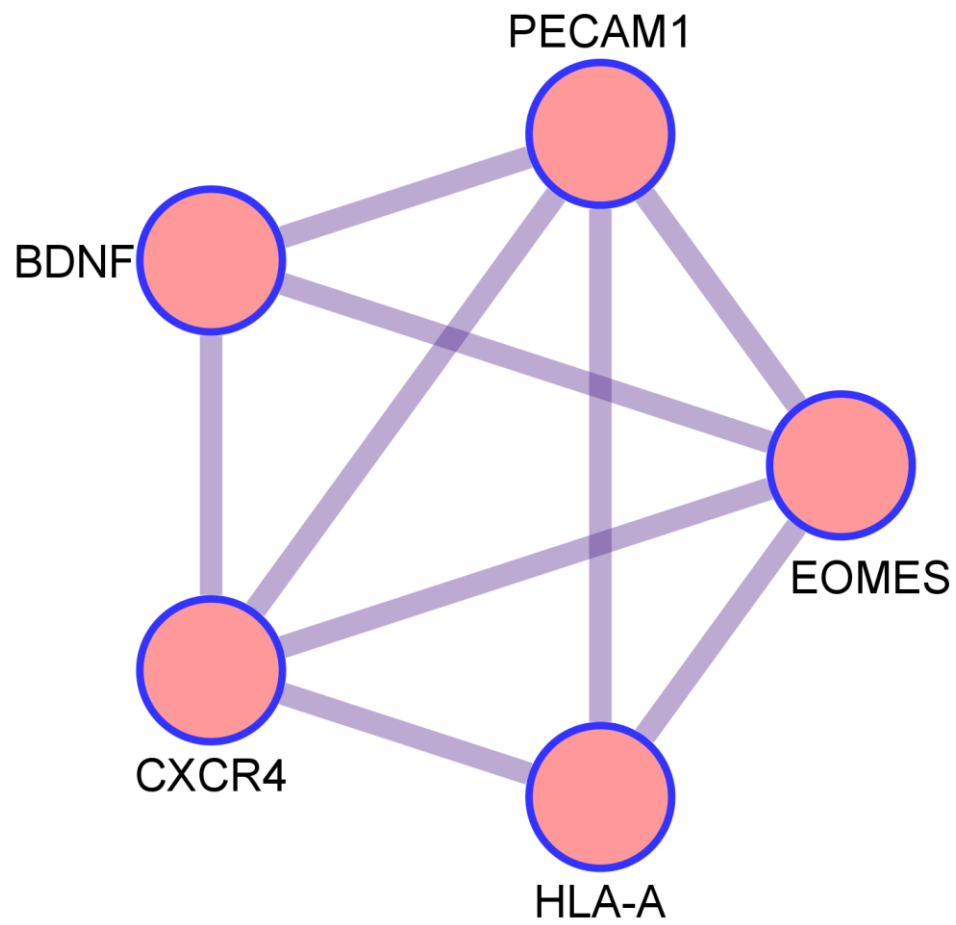

**Supplementary Figure S1:** Protein-Protein interaction between CXCR4, EOEMS, BDNF, PECAM1 and HLA-A with MCODE score 4.55 generated using Cytoscape.
