# Supplementary material for: Integrative Analysis to Identify Genes Associated with Stemness and Immune Infiltration in Glioblastoma
Source: Cells. 2021 Oct 15;10(10):2765. doi: 10.3390/cells10102765 (PMC8534801; doi:10.3390/cells10102765)
Supplement: Supplementary file 1 [file cells-10-02765-s001.zip › Supplementary table S1 -Enrichemnt analysis of PPI with 40 identifiers.xlsx]

## Sheet: GO-BP
Term	Adjusted P-value	Odds Ratio	Combined Score	Genes
cellular response to cytokine stimulus (GO:0071345)	1.35997e-25	50.7893	3283.89	ITGB1;ITGAM;CXCR4;FGF2;TNF;HIF1A;SOX2;CASP3;MYC;AKT1;FYN;IL10;STAT3;PTPN11;IL2;VEGFA;IL4;CD4;PIK3CA;LCK;BIRC5;NANOG;PTPN6;GAPDH;TP53
cytokine-mediated signaling pathway (GO:0019221)	9.50951e-25	42.297	2623.22	ITGB1;ITGAM;FGF2;TNF;HIF1A;SOX2;CASP3;MYC;AKT1;FYN;NCAM1;IL10;STAT3;PTPN11;HLA-A;IL2;VEGFA;IL4;CD4;IFNG;PIK3CA;LCK;BIRC5;NANOG;PTPN6;TP53
positive regulation of intracellular signal transduction (GO:1902533)	1.6239e-15	25.9409	1046.85	ITGB1;PTPN11;FGF2;TNF;EGFR;INS;VEGFA;SOX2;CD4;PTPRC;PIK3CA;LCK;ERBB2;CD28;FYN;PTPN6;HRAS;GAPDH;TP53
positive regulation of gene expression (GO:0010628)	3.39723e-15	27.0028	1062.01	IL10;STAT3;FGF2;TNF;HIF1A;EGFR;ACTB;INS;VEGFA;IL4;IFNG;MYC;ERBB2;CD28;AKT1;CD34;GAPDH;TP53
transmembrane receptor protein tyrosine kinase signaling pathway (GO:0007169)	3.72133e-15	29.639	1156.38	BDNF;STAT3;PTPN11;FGF2;EGFR;ACTB;INS;VEGFA;CD4;PIK3CA;LCK;CD8A;CASP3;ERBB2;AKT1;FYN;HRAS
positive regulation of cytokine production (GO:0001819)	4.60491e-15	32.8276	1267.8	IL10;STAT3;PTPN11;HLA-A;TNF;HIF1A;IL2;INS;IL4;CD4;PTPRC;IFNG;CD28;CTNNB1;CD34;GAPDH
positive regulation of cell population proliferation (GO:0008284)	3.83748e-14	25.0094	908.977	FGF2;TNF;EGFR;IL2;INS;VEGFA;IL4;PTPRC;IFNG;MYC;ERBB2;AKT1;BIRC5;NANOG;PTPN6;HRAS;NES
positive regulation of protein phosphorylation (GO:0001934)	4.9629e-13	26.6374	896.406	BDNF;PTPN11;FGF2;TNF;EGFR;INS;VEGFA;CD4;PTPRC;IFNG;ERBB2;PECAM1;AKT1;HRAS;TP53
negative regulation of apoptotic process (GO:0043066)	1.03303e-12	22.1578	726.804	ITGB1;IL10;BDNF;TNF;EGFR;IL2;VEGFA;IL4;PIK3CA;CASP3;MYC;CD28;AKT1;BIRC5;CTNNB1;TP53
positive regulation of protein localization to membrane (GO:1905477)	3.91765e-12	60.6319	1901.59	ITGB1;ITGAM;IFNG;ERBB2;AKT1;FYN;TNF;HRAS;TP53;EGFR
regulation of protein kinase B signaling (GO:0051896)	4.65917e-12	35.7629	1112.02	ITGB1;PIK3CA;LCK;ERBB2;CD28;AKT1;FYN;PTPN11;FGF2;TNF;EGFR;INS
positive regulation of protein kinase B signaling (GO:0051897)	9.28815e-12	41.4941	1257.99	ITGB1;PIK3CA;LCK;ERBB2;CD28;FYN;PTPN11;FGF2;TNF;EGFR;INS
positive regulation of phosphorylation (GO:0042327)	4.32515e-11	28.8694	828.525	CD4;IFNG;ERBB2;PECAM1;AKT1;FGF2;TNF;HIF1A;HRAS;EGFR;INS;VEGFA
regulation of cell population proliferation (GO:0042127)	4.69556e-11	15.0727	429.984	IL10;STAT3;FGF2;EGFR;IL2;INS;VEGFA;IL4;IFNG;MYC;ERBB2;AKT1;BIRC5;CTNNB1;PTPN6;HRAS;TP53
positive regulation of peptidyl-tyrosine phosphorylation (GO:0050731)	4.69556e-11	44.422	1264.86	IL4;PTPRC;IFNG;STAT3;PECAM1;PTPN11;TNF;TP53;IL2;VEGFA
positive regulation of multicellular organismal process (GO:0051240)	5.95668e-11	23.2828	655.907	IL10;CXCR4;PTPN11;FGF2;TNF;IL2;INS;VEGFA;IL4;IFNG;CD28;CTNNB1;GAPDH
positive regulation of cell migration (GO:0030335)	6.5092e-11	27.0501	756.661	ITGB1;IL4;PTPRC;IFNG;STAT3;PECAM1;PLCG1;HIF1A;HRAS;EGFR;INS;VEGFA
regulation of gene expression (GO:0010468)	6.5092e-11	12.5432	350.768	IL10;STAT3;FGF2;TNF;HIF1A;POU5F1;INS;VEGFA;SOX2;IL4;PTPRC;IFNG;MYC;CD28;AKT1;NANOG;CD34;HRAS;TP53
positive regulation of macromolecule metabolic process (GO:0010604)	1.94495e-10	20.7938	557.612	STAT3;FGF2;TNF;HIF1A;INS;VEGFA;IL4;IFNG;MYC;CD28;AKT1;CD34;TP53
positive regulation of transcription, DNA-templated (GO:0045893)	2.9662e-10	11.3596	299.245	EOMES;IL10;STAT3;FGF2;TNF;HIF1A;EGFR;POU5F1;VEGFA;SOX2;IL4;CD4;MYC;ERBB2;AKT1;CTNNB1;NANOG;HRAS;TP53
positive regulation of nucleic acid-templated transcription (GO:1903508)	3.73932e-10	17.1276	446.388	EOMES;IL10;STAT3;FGF2;TNF;HIF1A;EGFR;SOX2;IL4;CD4;MYC;AKT1;CTNNB1;TP53
positive regulation of cellular biosynthetic process (GO:0031328)	6.20958e-10	32.3268	824.615	IFNG;MYC;ERBB2;CD28;AKT1;FGF2;TNF;HIF1A;EGFR;INS
regulation of pri-miRNA transcription by RNA polymerase II (GO:1902893)	6.37986e-10	94.0702	2392.88	IL10;STAT3;FGF2;HIF1A;TNF;TP53;POU5F1
positive regulation of macromolecule biosynthetic process (GO:0010557)	8.94021e-10	40.2041	1007.4	IL4;IFNG;MYC;ERBB2;CD28;AKT1;FGF2;EGFR;INS
regulation of protein phosphorylation (GO:0001932)	1.08336e-09	24.2789	602.707	CD4;IFNG;ERBB2;PECAM1;AKT1;FYN;FGF2;TNF;HRAS;EGFR;VEGFA
positive regulation of MAPK cascade (GO:0043410)	1.43338e-09	23.5308	576.626	SOX2;CD4;PTPRC;ERBB2;PTPN11;FGF2;TNF;HRAS;EGFR;INS;VEGFA
regulation of peptidyl-tyrosine phosphorylation (GO:0050730)	1.94103e-09	49.7995	1201.55	PTPRC;PECAM1;FYN;PTPN11;PTPN6;TP53;EGFR;VEGFA
T cell activation (GO:0042110)	1.94103e-09	49.7995	1201.55	IL4;CD4;PTPRC;LCK;CD8A;CD28;IL2;INS
negative regulation of programmed cell death (GO:0043069)	2.35483e-09	18.7327	447.701	IL10;IL4;CASP3;MYC;CD28;AKT1;BIRC5;CTNNB1;TP53;EGFR;IL2;VEGFA
positive regulation of protein modification process (GO:0031401)	2.53096e-09	26.8927	639.871	CD4;IFNG;ERBB2;PECAM1;AKT1;FGF2;TNF;HRAS;EGFR;VEGFA
regulation of apoptotic process (GO:0042981)	2.792e-09	12.797	302.808	ITGB1;IL10;TNF;EGFR;IL2;VEGFA;IL4;CASP3;MYC;CD28;AKT1;BIRC5;CTNNB1;PTPN6;TP53
positive regulation of cellular process (GO:0048522)	3.57229e-09	13.8503	323.881	FGF2;TNF;EGFR;IL2;INS;VEGFA;IL4;IFNG;MYC;ERBB2;AKT1;BIRC5;PTPN6;HRAS
positive regulation of transcription by RNA polymerase II (GO:0045944)	3.89919e-09	11.3973	265.17	EOMES;IL10;STAT3;FGF2;TNF;HIF1A;EGFR;POU5F1;VEGFA;SOX2;IL4;MYC;CTNNB1;NANOG;HRAS;TP53
positive regulation of protein serine/threonine kinase activity (GO:0071902)	5.05779e-09	42.6552	980.045	IFNG;ERBB2;AKT1;FGF2;TNF;HRAS;EGFR;VEGFA
endodermal cell fate specification (GO:0001714)	5.71148e-09	1900.29	43374.9	EOMES;SOX2;NANOG;POU5F1
regulation of MAPK cascade (GO:0043408)	5.78319e-09	30.6719	698.853	SOX2;CD4;PTPRC;ERBB2;PTPN6;FGF2;HRAS;EGFR;INS
positive regulation of pri-miRNA transcription by RNA polymerase II (GO:1902895)	5.97535e-09	106.746	2425.78	IL10;STAT3;FGF2;HIF1A;TNF;TP53
positive regulation of epithelial cell proliferation (GO:0050679)	1.50153e-08	36.3185	790.895	MYC;ERBB2;AKT1;FGF2;HIF1A;HRAS;EGFR;VEGFA
regulation of tumor necrosis factor production (GO:0032680)	1.56128e-08	36.0036	781.697	IL10;IL4;PTPRC;IFNG;STAT3;PTPN11;PTPN6;CD34
T cell differentiation (GO:0030217)	1.82587e-08	85.3671	1837.93	CD4;PTPRC;CD8A;LCK;CD28;IL2
regulation of protein localization to plasma membrane (GO:1903076)	2.36005e-08	48.882	1038.67	ITGB1;IFNG;AKT1;TNF;EGFR;ACTB;INS
lymphocyte differentiation (GO:0030098)	3.26247e-08	46.3333	968.391	ITGB1;IL10;IL4;CD4;PTPRC;LCK;IL2
MAPK cascade (GO:0000165)	5.25951e-08	18.6396	380.237	PIK3CA;MYC;ERBB2;FYN;NCAM1;FGF2;TNF;HRAS;EGFR;IL2
regulation of epithelial cell proliferation (GO:0050678)	6.41419e-08	41.4657	836.695	SOX2;MYC;ERBB2;FGF2;HRAS;EGFR;VEGFA
negative regulation of gene expression (GO:0010629)	9.02762e-08	17.4875	346.493	IL10;IFNG;CD28;FGF2;TNF;HIF1A;CD34;HRAS;GAPDH;VEGFA
T cell receptor signaling pathway (GO:0050852)	9.13133e-08	27.7951	549.796	CD4;PTPRC;PIK3CA;LCK;CD28;FYN;PLCG1;HLA-A
regulation of blood vessel endothelial cell migration (GO:0043535)	9.78112e-08	60.9337	1199.79	AKT1;PLCG1;FGF2;TNF;HIF1A;VEGFA
regulation of ERK1 and ERK2 cascade (GO:0070372)	1.05295e-07	20.9518	410.558	CD4;PTPRC;ERBB2;PTPN11;PTPN6;FGF2;TNF;HRAS;EGFR
positive regulation of tyrosine phosphorylation of STAT protein (GO:0042531)	1.42636e-07	56.3236	1084.56	IL4;IFNG;STAT3;TNF;IL2;VEGFA
regulation of transcription, DNA-templated (GO:0006355)	1.42636e-07	6.69997	128.981	EOMES;IL10;STAT3;FGF2;TNF;HIF1A;EGFR;POU5F1;INS;VEGFA;SOX2;IL4;CD4;IFNG;MYC;ERBB2;AKT1;BIRC5;CTNNB1;NANOG;TP53
positive regulation of monooxygenase activity (GO:0032770)	1.55858e-07	105.679	2022.95	IFNG;AKT1;HIF1A;TNF;INS
endodermal cell fate commitment (GO:0001711)	1.60119e-07	316.635	6046.5	EOMES;SOX2;NANOG;POU5F1
ERBB signaling pathway (GO:0038127)	2.66772e-07	49.735	923.409	PIK3CA;ERBB2;AKT1;PTPN11;PLCG1;EGFR
antigen receptor-mediated signaling pathway (GO:0050851)	2.69584e-07	23.523	436.056	CD4;PTPRC;PIK3CA;LCK;CD28;FYN;PLCG1;HLA-A
regulation of tyrosine phosphorylation of STAT protein (GO:0042509)	3.08621e-07	48.1258	884.737	IL4;IFNG;STAT3;TNF;IL2;VEGFA
peptidyl-tyrosine phosphorylation (GO:0018108)	3.25595e-07	47.3595	866.422	IL4;LCK;ERBB2;FYN;PTPN6;EGFR
positive regulation of MAP kinase activity (GO:0043406)	3.25595e-07	47.3595	866.422	ERBB2;FGF2;TNF;HRAS;EGFR;VEGFA
cellular response to organic substance (GO:0071310)	3.46567e-07	30.6954	559.109	ERBB2;STAT3;CXCR4;CTNNB1;PTPN11;PTPN6;TNF
negative regulation of macromolecule metabolic process (GO:0010605)	3.5791e-07	22.3746	406.446	IFNG;CD28;FGF2;TNF;HIF1A;CD34;HRAS;VEGFA
regulation of angiogenesis (GO:0045765)	4.93249e-07	21.3323	379.957	ITGB1;ERBB2;CTNNB1;PLCG1;FGF2;HIF1A;CD34;VEGFA
axon guidance (GO:0007411)	4.93249e-07	21.3323	379.957	PIK3CA;BDNF;CXCR4;FYN;NCAM1;PTPN11;PLCG1;VEGFA
regulation of cell migration (GO:0030334)	6.24584e-07	13.6488	239.66	ITGB1;IL4;STAT3;PECAM1;AKT1;FGF2;HRAS;EGFR;INS;VEGFA
regulation of nitric-oxide synthase activity (GO:0050999)	7.25398e-07	71.4491	1242.74	AKT1;HIF1A;TNF;EGFR;INS
enzyme linked receptor protein signaling pathway (GO:0007167)	7.71395e-07	26.749	463.191	CD4;BDNF;LCK;CD8A;ERBB2;FYN;EGFR
positive regulation of cell motility (GO:2000147)	8.96134e-07	19.5117	334.642	ITGB1;IL4;STAT3;PECAM1;HRAS;EGFR;INS;VEGFA
response to growth factor (GO:0070848)	8.98179e-07	67.4729	1156.03	SOX2;MYC;ERBB2;AKT1;CTNNB1
positive regulation of phospholipase C activity (GO:0010863)	1.13261e-06	63.9153	1079.29	BDNF;PLCG1;FGF2;HRAS;EGFR
regulation of cytokine production (GO:0001817)	1.16879e-06	24.8659	418.743	IL10;PTPRC;IFNG;CD28;TNF;GAPDH;INS
axonogenesis (GO:0007409)	1.59743e-06	17.8966	295.526	PIK3CA;BDNF;CXCR4;FYN;NCAM1;PTPN11;PLCG1;ACTB
positive regulation of peptidyl-serine phosphorylation (GO:0033138)	1.60017e-06	34.2534	564.701	IFNG;BDNF;AKT1;TNF;EGFR;VEGFA
cellular response to growth factor stimulus (GO:0071363)	1.60017e-06	23.539	387.986	ERBB2;AKT1;CTNNB1;PTPN11;PLCG1;EGFR;VEGFA
positive regulation of nitric-oxide synthase activity (GO:0051000)	1.61013e-06	135.646	2228.73	AKT1;HIF1A;TNF;INS
epidermal growth factor receptor signaling pathway (GO:0007173)	1.61013e-06	57.8165	949.762	PIK3CA;AKT1;PTPN11;PLCG1;EGFR
positive regulation of neuron death (GO:1901216)	1.61013e-06	57.8165	949.762	ITGAM;IFNG;CTNNB1;FYN;TNF
positive regulation of epithelial cell migration (GO:0010634)	1.61013e-06	33.8625	556.08	IFNG;AKT1;PLCG1;FGF2;HIF1A;VEGFA
positive regulation of blood vessel endothelial cell migration (GO:0043536)	1.76104e-06	56.4691	921.512	AKT1;PLCG1;FGF2;HIF1A;VEGFA
regulation of MAP kinase activity (GO:0043405)	1.8936e-06	32.7412	531.496	ERBB2;FGF2;TNF;HRAS;EGFR;VEGFA
neuroinflammatory response (GO:0150076)	2.3803e-06	696	11130.1	IL4;ITGB1;IFNG
positive regulation of cell growth (GO:0030307)	2.44829e-06	31.0281	494.352	BDNF;ERBB2;AKT1;EGFR;IL2;INS
positive regulation of vasculature development (GO:1904018)	2.44829e-06	31.0281	494.352	ITGB1;PLCG1;FGF2;HIF1A;CD34;VEGFA
positive regulation of protein localization to cell periphery (GO:1904377)	2.44829e-06	51.6528	821.716	ITGB1;IFNG;AKT1;TNF;EGFR
positive regulation of protein localization to plasma membrane (GO:1903078)	2.44829e-06	51.6528	821.716	ITGB1;IFNG;AKT1;TNF;EGFR
positive regulation of ERK1 and ERK2 cascade (GO:0070374)	2.44829e-06	21.5265	342.299	CD4;PTPRC;PTPN11;FGF2;TNF;HRAS;EGFR
positive regulation of cellular metabolic process (GO:0031325)	2.78838e-06	30.0833	474.09	IL4;IFNG;AKT1;TP53;INS;VEGFA
regulation of phosphatidylinositol 3-kinase signaling (GO:0014066)	2.90713e-06	29.781	467.642	PIK3CA;PTPN6;FGF2;TNF;EGFR;INS
negative regulation of signal transduction (GO:0009968)	2.90713e-06	16.0089	251.244	IL10;PTPRC;BDNF;ERBB2;AKT1;FGF2;TNF;EGFR
microglial cell activation (GO:0001774)	3.26728e-06	105.481	1641.89	IL4;ITGAM;IFNG;TNF
peptidyl-tyrosine modification (GO:0018212)	3.34678e-06	47.5921	739.114	LCK;ERBB2;FYN;PTPN6;EGFR
regulation of interleukin-6 production (GO:0032675)	3.4726e-06	28.6298	443.246	IL10;IFNG;STAT3;PTPN11;PTPN6;TNF
positive regulation of metabolic process (GO:0009893)	4.03001e-06	27.8229	426.301	IL4;IFNG;CXCR4;TNF;INS;VEGFA
regulation of nitric oxide mediated signal transduction (GO:0010749)	4.07398e-06	463.977	7098.86	EGFR;INS;VEGFA
positive regulation of protein targeting to membrane (GO:0090314)	4.47317e-06	94.9238	1442.43	ITGAM;ERBB2;FYN;HRAS
positive regulation of angiogenesis (GO:0045766)	4.55666e-06	27.06	410.401	ITGB1;PLCG1;FGF2;HIF1A;CD34;VEGFA
regulation of cell cycle (GO:0051726)	5.8371e-06	14.3757	214.313	SOX2;PTPRC;IFNG;MYC;STAT3;BIRC5;HRAS;TP53
regulation of macromolecule metabolic process (GO:0060255)	5.96352e-06	18.3774	273.382	SOX2;IL10;PTPRC;MYC;NANOG;HIF1A;POU5F1
cellular response to epidermal growth factor stimulus (GO:0071364)	8.12026e-06	79.0873	1150.44	ERBB2;PTPN11;PLCG1;EGFR
regulation of immunoglobulin production (GO:0002637)	8.12026e-06	79.0873	1150.44	IL10;IL4;PTPRC;IL2
regulation of protein targeting to membrane (GO:0090313)	9.30775e-06	75.92	1093.23	ITGAM;ERBB2;FYN;HRAS
regulation of cytokine-mediated signaling pathway (GO:0001959)	1.21657e-05	35.1449	496.309	PTPRC;IFNG;PTPN11;PTPN6;TNF
positive regulation of immune response (GO:0050778)	1.27548e-05	34.6411	486.863	IL10;ITGAM;PTPRC;IFNG;IL2
positive regulation of T cell activation (GO:0050870)	1.27548e-05	34.6411	486.863	IL4;PTPRC;LCK;CD28;HLA-A
positive regulation of immune effector process (GO:0002699)	1.32366e-05	67.7755	948.177	IL10;PTPRC;IFNG;IL2
positive regulation of interleukin-10 production (GO:0032733)	1.32366e-05	67.7755	948.177	IL4;STAT3;CD28;CD34
positive regulation of growth (GO:0045927)	1.32366e-05	34.1515	477.716	ERBB2;AKT1;EGFR;IL2;INS
positive regulation of endothelial cell proliferation (GO:0001938)	1.38373e-05	33.6755	468.854	AKT1;PLCG1;FGF2;HIF1A;VEGFA
positive regulation of phosphatidylinositol 3-kinase signaling (GO:0014068)	1.38373e-05	33.6755	468.854	PIK3CA;PTPN6;FGF2;TNF;INS
apoptotic process (GO:0006915)	1.38373e-05	15.8093	219.844	IFNG;PIK3CA;CASP3;MYC;CXCR4;AKT1;GAPDH
regulation of autophagy (GO:0010506)	1.38373e-05	15.8093	219.844	IL10;IFNG;CASP3;STAT3;AKT1;GAPDH;GFAP
positive regulation of ATP metabolic process (GO:1903580)	1.43213e-05	65.4351	907.09	IL4;IFNG;HIF1A;INS
negative regulation of transcription, DNA-templated (GO:0045892)	1.55953e-05	7.17119	98.7335	SOX2;EOMES;IL4;IFNG;MYC;STAT3;BIRC5;CTNNB1;TNF;TP53;POU5F1;VEGFA
positive regulation of intracellular protein transport (GO:0090316)	1.60421e-05	20.9282	287.36	ITGAM;IFNG;ERBB2;FYN;HRAS;TP53
positive regulation of cellular amide metabolic process (GO:0034250)	1.69007e-05	31.8967	436.017	IFNG;CASP3;ERBB2;CD28;TNF
macrophage activation (GO:0042116)	1.9786e-05	59.2917	800.625	IL4;ITGAM;IFNG;TNF
positive regulation of DNA-binding transcription factor activity (GO:0051091)	1.9958e-05	14.8058	199.667	IL10;STAT3;AKT1;CTNNB1;TNF;INS;VEGFA
positive regulation of signaling receptor activity (GO:2000273)	2.1762e-05	57.4921	769.843	ITGB1;IL10;IFNG;HIF1A
regulation of neuron death (GO:1901214)	2.18036e-05	29.9202	400.071	ITGAM;IFNG;AKT1;FYN;CD34
positive regulation of endothelial cell migration (GO:0010595)	2.18036e-05	29.9202	400.071	AKT1;PLCG1;FGF2;HIF1A;VEGFA
regulation of cysteine-type endopeptidase activity involved in apoptotic process (GO:0043281)	2.56347e-05	28.8473	380.81	SOX2;MYC;AKT1;TNF;VEGFA
regulation of nitric oxide biosynthetic process (GO:0045428)	2.89548e-05	52.6931	688.734	IFNG;AKT1;TNF;CD34
negative regulation of cell population proliferation (GO:0008285)	2.9286e-05	11.1125	145.028	SOX2;IL10;IFNG;MYC;CTNNB1;PTPN6;HRAS;TP53
hemopoiesis (GO:0030097)	3.27784e-05	27.2198	351.951	IL10;PTPRC;LCK;CD34;TP53
regulation of MHC class II biosynthetic process (GO:0045346)	3.31057e-05	154.612	1996.32	IL10;IL4;IFNG
negative regulation of transcription by RNA polymerase II (GO:0000122)	3.64695e-05	7.94593	101.762	SOX2;EOMES;IL4;IFNG;MYC;STAT3;TNF;TP53;POU5F1;VEGFA
regulation of peptidyl-serine phosphorylation (GO:0033135)	3.93026e-05	26.0438	331.38	BDNF;AKT1;TNF;EGFR;VEGFA
branching morphogenesis of an epithelial tube (GO:0048754)	4.03483e-05	47.4143	601.293	MYC;CTNNB1;FGF2;VEGFA
regulation of endothelial cell apoptotic process (GO:2000351)	4.03483e-05	47.4143	601.293	IL10;IL4;PLCG1;TNF
entry into host (GO:0044409)	4.12765e-05	139.144	1760.32	CD4;CXCR4;CTNNB1
negative regulation of cytokine production (GO:0001818)	4.6268e-05	16.8562	211.193	IL10;PTPRC;IFNG;PTPN6;TNF;CD34
regulation of B cell proliferation (GO:0030888)	4.64947e-05	45.1519	564.444	IL10;IL4;PTPRC;IL2
negative regulation of tumor necrosis factor production (GO:0032720)	4.64947e-05	45.1519	564.444	IL10;IL4;PTPN6;CD34
positive regulation of smooth muscle cell proliferation (GO:0048661)	4.64947e-05	45.1519	564.444	IL10;AKT1;FGF2;TNF
regulation of transcription by RNA polymerase II (GO:0006357)	4.65259e-05	4.75741	59.4329	EOMES;STAT3;FGF2;TNF;HIF1A;EGFR;POU5F1;VEGFA;SOX2;IL4;IFNG;MYC;ERBB2;CTNNB1;NANOG;HRAS;TP53
regulation of interleukin-10 production (GO:0032653)	5.36168e-05	43.0952	531.295	IL4;STAT3;CD28;CD34
regulation of interleukin-2 production (GO:0032663)	5.36168e-05	43.0952	531.295	CD4;PTPRC;CD28;CD34
negative regulation of tumor necrosis factor superfamily cytokine production (GO:1903556)	5.36168e-05	43.0952	531.295	IL10;IL4;PTPN6;CD34
regulation of smooth muscle cell proliferation (GO:0048660)	5.78563e-05	42.1354	515.945	IFNG;AKT1;CTNNB1;TNF
regulation of phospholipase C activity (GO:1900274)	5.98051e-05	115.942	1413.33	PLCG1;FGF2;HRAS
macrophage differentiation (GO:0030225)	5.98051e-05	115.942	1413.33	CD4;IFNG;VEGFA
positive regulation of heterotypic cell-cell adhesion (GO:0034116)	5.98051e-05	115.942	1413.33	IL10;LCK;TNF
regulation of epithelial cell migration (GO:0010632)	6.60675e-05	40.3384	487.417	IL4;IFNG;PLCG1;HIF1A
regulation of macroautophagy (GO:0016241)	6.66653e-05	22.6202	272.96	IL4;PIK3CA;CASP3;AKT1;GAPDH
regulation of amyloid-beta clearance (GO:1900221)	7.16856e-05	107.018	1282.49	IL4;IFNG;TNF
positive regulation of kinase activity (GO:0033674)	7.16856e-05	22.203	266	CD4;PTPRC;ERBB2;TNF;EGFR
regulation of protein-containing complex assembly (GO:0043254)	7.75107e-05	21.8007	259.326	IFNG;PTPN11;TNF;GFAP;VEGFA
positive regulation of cytokine production involved in inflammatory response (GO:1900017)	8.54052e-05	99.3688	1171.69	STAT3;HIF1A;TNF
cell migration involved in sprouting angiogenesis (GO:0002042)	9.95744e-05	92.7395	1076.77	AKT1;FGF2;VEGFA
regulation of production of miRNAs involved in gene silencing by miRNA (GO:1903798)	9.95744e-05	92.7395	1076.77	TNF;TP53;EGFR
negative regulation of lipid catabolic process (GO:0050995)	9.95744e-05	92.7395	1076.77	AKT1;TNF;INS
positive regulation of amyloid-beta formation (GO:1902004)	9.95744e-05	92.7395	1076.77	IFNG;CASP3;TNF
negative regulation of multicellular organismal process (GO:0051241)	0.000100007	14.2399	165.178	IL10;IL4;IFNG;TNF;EGFR;INS
regulation of cell growth (GO:0001558)	0.00010755	14.0353	161.691	ERBB2;AKT1;TP53;EGFR;IL2;INS
response to reactive oxygen species (GO:0000302)	0.000108632	34.4571	396.158	AKT1;FYN;HIF1A;EGFR
negative regulation of autophagy (GO:0010507)	0.000108632	34.4571	396.158	IL10;PIK3CA;STAT3;AKT1
negative regulation of oxidative stress-induced intrinsic apoptotic signaling pathway (GO:1902176)	0.000114221	86.939	994.619	AKT1;HIF1A;INS
B cell differentiation (GO:0030183)	0.00012254	33.2448	377.782	ITGB1;IL10;IL4;PTPRC
regulation of cell adhesion (GO:0030155)	0.000139271	18.8891	212.11	ERBB2;CXCR4;PTPN11;TNF;VEGFA
positive regulation of glycolytic process (GO:0045821)	0.000152314	77.2713	859.796	IFNG;HIF1A;INS
positive regulation of purine nucleotide metabolic process (GO:1900544)	0.000152314	77.2713	859.796	IFNG;HIF1A;INS
positive regulation of cell death (GO:0010942)	0.000162578	30.5561	337.62	ITGAM;IFNG;FYN;TNF
positive regulation of T cell proliferation (GO:0042102)	0.000162578	30.5561	337.62	IL4;PTPRC;CD28;IL2
regulation of membrane protein ectodomain proteolysis (GO:0051043)	0.000170679	73.2007	803.89	IL10;IFNG;TNF
positive regulation of amyloid precursor protein catabolic process (GO:1902993)	0.000170679	73.2007	803.89	IFNG;CASP3;TNF
positive regulation of neural precursor cell proliferation (GO:2000179)	0.000170679	73.2007	803.89	CTNNB1;NES;VEGFA
cellular response to decreased oxygen levels (GO:0036294)	0.000188153	29.1414	316.834	MYC;HIF1A;TP53;VEGFA
negative regulation of cellular catabolic process (GO:0031330)	0.000188153	29.1414	316.834	IL10;STAT3;AKT1;INS
blood vessel endothelial cell migration (GO:0043534)	0.000192423	69.5372	754.05	AKT1;FGF2;VEGFA
Fc-gamma receptor signaling pathway involved in phagocytosis (GO:0038096)	0.000205773	28.2687	304.138	PIK3CA;FYN;PLCG1;ACTB
myeloid leukocyte differentiation (GO:0002573)	0.000205773	28.2687	304.138	IL4;CD4;IFNG;VEGFA
positive regulation of cellular protein localization (GO:1903829)	0.000205773	28.2687	304.138	AKT1;FYN;TNF;INS
positive regulation of transferase activity (GO:0051347)	0.000207681	16.8949	180.991	CD4;MYC;ERBB2;CTNNB1;EGFR
response to gamma radiation (GO:0010332)	0.000207681	66.2226	709.371	MYC;HRAS;TP53
positive regulation of carbohydrate metabolic process (GO:0045913)	0.000207681	66.2226	709.371	IFNG;HIF1A;INS
positive regulation of neuron apoptotic process (GO:0043525)	0.000207681	66.2226	709.371	ITGAM;CTNNB1;TNF
positive regulation of phospholipase activity (GO:0010518)	0.000207681	66.2226	709.371	PLCG1;FGF2;HRAS
positive regulation of transcription from RNA polymerase II promoter in response to stress (GO:0036003)	0.000207681	66.2226	709.371	HIF1A;TP53;VEGFA
extrinsic apoptotic signaling pathway (GO:0097191)	0.000207681	27.8515	298.105	IL4;IFNG;CASP3;TNF
Fc-gamma receptor signaling pathway (GO:0038094)	0.000207681	27.8515	298.105	PIK3CA;FYN;PLCG1;ACTB
positive regulation of signal transduction (GO:0009967)	0.000212779	12.0171	128.264	PTPRC;BDNF;STAT3;PTPN11;HIF1A;INS
cellular response to organic cyclic compound (GO:0071407)	0.000215815	16.6602	177.4	CASP3;CTNNB1;TNF;EGFR;ACTB
response to cytokine (GO:0034097)	0.000215815	16.6602	177.4	CASP3;STAT3;CXCR4;PTPN11;PTPN6
Fc receptor mediated stimulatory signaling pathway (GO:0002431)	0.000225956	27.0531	286.622	PIK3CA;FYN;PLCG1;ACTB
regulation of heterotypic cell-cell adhesion (GO:0034114)	0.000225956	63.2093	669.114	IL10;LCK;TNF
negative regulation of sequestering of calcium ion (GO:0051283)	0.000225956	63.2093	669.114	PTPRC;LCK;FGF2
positive regulation of lymphocyte proliferation (GO:0050671)	0.000234843	26.6707	281.154	IL4;PTPRC;CD28;IL2
positive regulation of protein kinase activity (GO:0045860)	0.000238303	16.2097	170.552	CD4;PTPRC;IFNG;TNF;VEGFA
regulation of T cell proliferation (GO:0042129)	0.000243504	26.2989	275.857	IL10;IL4;PTPRC;CD28
positive regulation of interleukin-6 production (GO:0032755)	0.000243504	26.2989	275.857	IFNG;STAT3;PTPN11;TNF
positive regulation of glucose import (GO:0046326)	0.000246922	60.458	632.675	AKT1;PTPN11;INS
positive regulation of interleukin-2 production (GO:0032743)	0.000246922	60.458	632.675	CD4;PTPRC;CD28
positive regulation of tumor necrosis factor production (GO:0032760)	0.000252367	25.9374	270.724	PTPRC;IFNG;STAT3;PTPN11
negative regulation of apoptotic signaling pathway (GO:2001234)	0.000264173	25.5856	265.748	IL4;BDNF;AKT1;TNF
regulation of vasculature development (GO:1901342)	0.000268807	57.936	599.553	ERBB2;CTNNB1;FGF2
release of sequestered calcium ion into cytosol (GO:0051209)	0.000268807	57.936	599.553	PTPRC;LCK;FGF2
positive regulation of gene silencing by miRNA (GO:2000637)	0.000268807	57.936	599.553	STAT3;TP53;EGFR
positive regulation of nitric oxide biosynthetic process (GO:0045429)	0.000268807	57.936	599.553	IFNG;AKT1;TNF
central nervous system development (GO:0007417)	0.000272974	11.274	116.439	EOMES;ITGAM;STAT3;CXCR4;PTPN11;NES
phosphorylation (GO:0016310)	0.000275494	8.93371	92.1401	PIK3CA;LCK;ERBB2;STAT3;AKT1;BIRC5;FYN
regulation of interleukin-8 production (GO:0032677)	0.000291607	24.585	251.696	IL10;PTPRC;STAT3;TNF
positive regulation of tumor necrosis factor superfamily cytokine production (GO:1903557)	0.000291607	24.585	251.696	PTPRC;IFNG;STAT3;PTPN11
negative regulation of oxidative stress-induced cell death (GO:1903202)	0.000291607	55.6158	569.328	AKT1;FYN;INS
positive regulation of nitric oxide metabolic process (GO:1904407)	0.000291607	55.6158	569.328	IFNG;AKT1;TNF
ephrin receptor signaling pathway (GO:0048013)	0.000304237	24.2686	247.284	FYN;PTPN11;HRAS;ACTB
negative regulation of cellular process (GO:0048523)	0.000318394	7.31786	74.1826	IL10;MYC;CTNNB1;PTPN6;FGF2;CD34;HRAS;TP53
negative regulation of wound healing (GO:0061045)	0.000318394	53.4741	541.651	FGF2;TNF;CD34
positive regulation of leukocyte migration (GO:0002687)	0.000318394	53.4741	541.651	IL4;TNF;VEGFA
B cell activation (GO:0042113)	0.000343625	23.3663	234.786	ITGB1;IL10;IL4;PTPRC
regulation of protein localization to membrane (GO:1905475)	0.000346442	51.491	516.221	FYN;ACTB;INS
maintenance of blood-brain barrier (GO:0035633)	0.000346442	51.491	516.221	ITGB1;PECAM1;ACTB
positive regulation of B cell proliferation (GO:0030890)	0.000346442	51.491	516.221	IL4;PTPRC;IL2
positive regulation of programmed cell death (GO:0043068)	0.000366151	10.5396	105.031	ITGB1;IFNG;CASP3;CTNNB1;TNF;TP53
negative regulation of interleukin-6 production (GO:0032715)	0.000379314	49.6495	492.786	IL10;PTPN6;TNF
bone marrow development (GO:0048539)	0.000395734	302.288	2984.64	PTPRC;TP53
positive regulation of transcription from RNA polymerase II promoter in response to hypoxia (GO:0061419)	0.000395734	302.288	2984.64	HIF1A;VEGFA
regulation of nucleic acid-templated transcription (GO:1903506)	0.000401088	8.28739	81.6752	SOX2;STAT3;NANOG;HIF1A;TP53;POU5F1;INS
activation of phospholipase C activity (GO:0007202)	0.000406326	47.935	471.128	BDNF;PLCG1;EGFR
ERBB2 signaling pathway (GO:0038128)	0.000406326	47.935	471.128	PIK3CA;ERBB2;EGFR
positive regulation of glucose transmembrane transport (GO:0010828)	0.000406326	47.935	471.128	AKT1;PTPN11;INS
regulation of immune response (GO:0050776)	0.000414931	13.8632	135.9	ITGB1;IL4;CD8A;HLA-A;CD34
regulation of endothelial cell proliferation (GO:0001936)	0.000438163	21.5	209.362	AKT1;FGF2;HIF1A;VEGFA
regulation of protein localization to cell surface (GO:2000008)	0.000438163	46.3349	451.059	BDNF;CTNNB1;TNF
positive regulation of receptor signaling pathway via JAK-STAT (GO:0046427)	0.000438163	46.3349	451.059	IL10;IL4;TNF
negative regulation of cell death (GO:0060548)	0.000473035	21.0201	202.921	AKT1;FYN;FGF2;CD34
regulation of amyloid-beta formation (GO:1902003)	0.000473367	44.838	432.417	IFNG;CASP3;TNF
phosphatidylinositol 3-kinase signaling (GO:0014065)	0.000473367	44.838	432.417	PIK3CA;ERBB2;AKT1
positive regulation of immunoglobulin production (GO:0002639)	0.000514614	43.4346	415.061	IL10;PTPRC;IL2
negative regulation of cell differentiation (GO:0045596)	0.000541854	12.9609	123.069	SOX2;IFNG;PTPN11;TNF;EGFR
regulation of osteoclast differentiation (GO:0045670)	0.000541854	42.1163	398.866	IL4;IFNG;TNF
positive regulation of myeloid leukocyte differentiation (GO:0002763)	0.000541854	42.1163	398.866	CD4;IFNG;TNF
regulation of immunoglobulin mediated immune response (GO:0002889)	0.000541854	226.705	2146.78	IL10;IL4
glomerulus vasculature development (GO:0072012)	0.000541854	226.705	2146.78	PECAM1;CD34
regulation of vitamin D biosynthetic process (GO:0060556)	0.000541854	226.705	2146.78	IFNG;TNF
positive regulation of I-kappaB phosphorylation (GO:1903721)	0.000541854	226.705	2146.78	AKT1;TNF
positive regulation of non-membrane spanning protein tyrosine kinase activity (GO:1903997)	0.000541854	226.705	2146.78	BDNF;FYN
response to UV (GO:0009411)	0.000549356	19.9088	188.167	MYC;AKT1;TP53;EGFR
regulation of programmed cell death (GO:0043067)	0.000563498	12.7533	120.158	AKT1;BIRC5;PTPN6;TNF;TP53
regulation of glucose import (GO:0046324)	0.000580585	40.8755	383.725	AKT1;PTPN11;INS
calcium-mediated signaling (GO:0019722)	0.000604144	19.2964	180.137	PTPRC;CXCR4;PLCG1;EGFR
regulation of protein catabolic process (GO:0042176)	0.000604144	19.2964	180.137	TNF;EGFR;INS;GFAP
positive regulation of cellular protein metabolic process (GO:0032270)	0.000604144	19.2964	180.137	ERBB2;CD28;AKT1;INS
regulation of cellular macromolecule biosynthetic process (GO:2000112)	0.000608483	7.58947	70.7635	SOX2;STAT3;NANOG;HIF1A;TP53;POU5F1;INS
response to estradiol (GO:0032355)	0.000613732	39.7056	369.541	STAT3;CTNNB1;EGFR
positive regulation of production of molecular mediator of immune response (GO:0002702)	0.000613732	39.7056	369.541	IL10;PTPRC;IL2
regulation of T cell differentiation (GO:0045580)	0.000661076	38.6008	356.231	IL4;IFNG;IL2
regulation of inflammatory response (GO:0050727)	0.000708813	11.9846	109.529	IL10;IL4;IFNG;TNF;IL2
regulation of calcidiol 1-monooxygenase activity (GO:0060558)	0.000708813	181.355	1656.58	IFNG;TNF
regulation of I-kappaB phosphorylation (GO:1903719)	0.000708813	181.355	1656.58	AKT1;TNF
regulation of non-membrane spanning protein tyrosine kinase activity (GO:1903995)	0.000708813	181.355	1656.58	BDNF;FYN
vascular wound healing (GO:0061042)	0.000708813	181.355	1656.58	CD34;VEGFA
negative regulation of acute inflammatory response (GO:0002674)	0.000708813	181.355	1656.58	IL4;INS
regulation of cell development (GO:0060284)	0.000744122	36.5655	331.936	AKT1;CTNNB1;INS
negative regulation of cell-cell adhesion (GO:0022408)	0.000744122	36.5655	331.936	IL10;AKT1;VEGFA
regulation of protein kinase activity (GO:0045859)	0.00076804	17.8329	161.249	CD4;PTPRC;AKT1;TNF
calcium ion transmembrane import into cytosol (GO:0097553)	0.000782135	35.6261	320.826	PTPRC;LCK;FGF2
regulation of chemokine production (GO:0032642)	0.000782135	35.6261	320.826	IFNG;HIF1A;TNF
negative regulation of protein catabolic process (GO:0042177)	0.000782135	35.6261	320.826	IL10;EGFR;INS
negative regulation of inflammatory response (GO:0050728)	0.000782135	11.6337	104.754	IL10;IL4;FYN;PLCG1;INS
phosphate-containing compound metabolic process (GO:0006796)	0.000782135	11.6337	104.754	PTPRC;PIK3CA;STAT3;AKT1;PLCG1
protein phosphorylation (GO:0006468)	0.000812242	7.14462	64.0355	LCK;ERBB2;AKT1;BIRC5;FYN;PTPN6;EGFR
regulation of cytokine production involved in inflammatory response (GO:1900015)	0.000828972	34.7337	310.334	STAT3;HIF1A;TNF
negative regulation of proteolysis (GO:0045861)	0.000828972	34.7337	310.334	IL10;AKT1;INS
activation of protein kinase activity (GO:0032147)	0.000851393	17.181	152.981	IL4;AKT1;INS;VEGFA
alpha-beta T cell activation (GO:0046631)	0.000870301	151.121	1337.16	HLA-A;INS
regulation of dendritic spine maintenance (GO:1902950)	0.000870301	151.121	1337.16	FYN;INS
commissural neuron axon guidance (GO:0071679)	0.000870301	151.121	1337.16	NCAM1;VEGFA
regulation of nitrogen compound metabolic process (GO:0051171)	0.000870301	151.121	1337.16	IFNG;TNF
fusion of virus membrane with host plasma membrane (GO:0019064)	0.000870301	151.121	1337.16	CD4;CXCR4
membrane fusion involved in viral entry into host cell (GO:0039663)	0.000870301	151.121	1337.16	CD4;CXCR4
negative regulation of amyloid-beta clearance (GO:1900222)	0.000870301	151.121	1337.16	IFNG;TNF
positive regulation of MHC class II biosynthetic process (GO:0045348)	0.000870301	151.121	1337.16	IL4;IFNG
positive regulation of steroid biosynthetic process (GO:0010893)	0.000870301	151.121	1337.16	IFNG;TNF
regulation of receptor signaling pathway via JAK-STAT (GO:0046425)	0.000908195	33.0764	291.015	IL10;PTPRC;TNF
positive regulation of RNA metabolic process (GO:0051254)	0.000908195	33.0764	291.015	HRAS;TP53;EGFR
positive regulation of protein-containing complex assembly (GO:0031334)	0.000929814	16.5748	145.378	IFNG;TNF;TP53;VEGFA
regulation of fibroblast proliferation (GO:0048145)	0.000959414	32.3056	282.106	MYC;CTNNB1;TP53
regulation of telomerase activity (GO:0051972)	0.000959414	32.3056	282.106	MYC;CTNNB1;TP53
cellular response to interferon-gamma (GO:0071346)	0.00100851	16.1473	140.068	IFNG;NCAM1;HLA-A;GAPDH
epithelial to mesenchymal transition (GO:0001837)	0.00100851	31.5698	273.649	EOMES;CTNNB1;HIF1A
regulation of wound healing (GO:0061041)	0.00100851	31.5698	273.649	ITGB1;FGF2;HRAS
positive regulation of cell-cell adhesion (GO:0022409)	0.00100851	31.5698	273.649	IL10;LCK;TNF
inflammatory response (GO:0006954)	0.00105027	10.6932	92.2176	IL4;IFNG;STAT3;CXCR4;TNF
anoikis (GO:0043276)	0.00105852	129.526	1113.72	PIK3CA;AKT1
regulation of complement-dependent cytotoxicity (GO:1903659)	0.00105852	129.526	1113.72	IL10;IL4
regulation of transmembrane transporter activity (GO:0022898)	0.00105852	129.526	1113.72	ACTB;INS
negative regulation of production of molecular mediator of immune response (GO:0002701)	0.00105852	129.526	1113.72	IL10;TNF
positive regulation of B cell differentiation (GO:0045579)	0.00105852	129.526	1113.72	IL10;IL2
cellular response to oxidative stress (GO:0034599)	0.00110783	15.6104	133.459	AKT1;HIF1A;TP53;EGFR
negative regulation of catabolic process (GO:0009895)	0.00111038	30.1941	257.966	TNF;EGFR;INS
regulation of cellular component movement (GO:0051270)	0.00117527	29.5502	250.684	ERBB2;EGFR;VEGFA
adherens junction assembly (GO:0034333)	0.00129838	113.33	949.331	CTNNB1;ACTB
endothelium development (GO:0003158)	0.00129838	113.33	949.331	PECAM1;CD34
cellular response to hypoxia (GO:0071456)	0.00129838	14.8684	124.443	MYC;HIF1A;TP53;VEGFA
sprouting angiogenesis (GO:0002040)	0.00129838	28.3412	237.116	AKT1;FGF2;VEGFA
negative regulation of cellular biosynthetic process (GO:0031327)	0.00129838	28.3412	237.116	FYN;CD34;INS
negative regulation of cellular macromolecule biosynthetic process (GO:2000113)	0.00130051	6.4529	53.9554	IL4;IFNG;BIRC5;CTNNB1;TNF;GAPDH;TP53
regulation of cell motility (GO:2000145)	0.00134649	14.6364	121.653	ERBB2;AKT1;FGF2;EGFR
negative regulation of cysteine-type endopeptidase activity (GO:2000117)	0.00134649	27.773	230.789	AKT1;TNF;VEGFA
positive regulation of B cell activation (GO:0050871)	0.00134649	27.773	230.789	IL4;PTPRC;IL2
positive regulation of chemokine production (GO:0032722)	0.00134649	27.773	230.789	IFNG;TNF;HIF1A
positive regulation of phagocytosis (GO:0050766)	0.00134649	27.773	230.789	PTPRC;IFNG;TNF
negative regulation of cysteine-type endopeptidase activity involved in apoptotic process (GO:0043154)	0.0014981	26.7021	218.952	AKT1;TNF;VEGFA
angiogenesis involved in wound healing (GO:0060055)	0.00150179	100.732	823.741	CD34;VEGFA
response to corticosteroid (GO:0031960)	0.00150179	100.732	823.741	IL10;TNF
negative regulation of oxidative stress-induced neuron death (GO:1903204)	0.00150179	100.732	823.741	IL10;HIF1A
positive regulation of cellular respiration (GO:1901857)	0.00150179	100.732	823.741	IL4;IFNG
positive regulation of neuroblast proliferation (GO:0002052)	0.00150179	100.732	823.741	CTNNB1;VEGFA
positive regulation of production of miRNAs involved in gene silencing by miRNA (GO:1903800)	0.00150179	100.732	823.741	TP53;EGFR
positive regulation of interleukin-1 beta production (GO:0032731)	0.00154405	26.197	213.41	IFNG;STAT3;TNF
regulation of cellular component organization (GO:0051128)	0.00154405	13.9817	113.856	PTPN11;MKI67;TNF;GFAP
regulation of mitotic nuclear division (GO:0007088)	0.00161696	25.7106	208.098	CD28;MKI67;INS
positive regulation of cellular catabolic process (GO:0031331)	0.00161988	13.7762	111.433	IFNG;TNF;HIF1A;INS
regulation of phagocytosis (GO:0050764)	0.00169147	25.2419	203.004	PTPRC;IFNG;TNF
regulation of B cell apoptotic process (GO:0002902)	0.00173706	90.6545	724.934	IL10;IL2
regulation of feeding behavior (GO:0060259)	0.00173706	90.6545	724.934	STAT3;INS
regulation of leukocyte cell-cell adhesion (GO:1903037)	0.00173706	90.6545	724.934	LCK;AKT1
eye photoreceptor cell differentiation (GO:0001754)	0.00173706	90.6545	724.934	STAT3;VEGFA
negative regulation of gene silencing by miRNA (GO:0060965)	0.00173706	90.6545	724.934	TNF;POU5F1
negative regulation of production of miRNAs involved in gene silencing by miRNA (GO:1903799)	0.00173706	90.6545	724.934	STAT3;TNF
positive regulation of apoptotic signaling pathway (GO:2001235)	0.00174006	24.7899	198.116	LCK;TNF;TP53
response to organic cyclic compound (GO:0014070)	0.00182297	24.3537	193.42	STAT3;CTNNB1;TNF
positive regulation of DNA biosynthetic process (GO:2000573)	0.0019082	23.9326	188.907	MYC;CTNNB1;FGF2
brain development (GO:0007420)	0.00197512	12.9211	101.48	EOMES;CXCR4;PTPN11;NES
regulation of neurogenesis (GO:0050767)	0.00197512	23.5258	184.567	IFNG;CTNNB1;TNF
positive regulation of cysteine-type endopeptidase activity (GO:2001056)	0.00197512	23.5258	184.567	MYC;FYN;TNF
positive regulation of interleukin-1 production (GO:0032732)	0.00197512	23.5258	184.567	IFNG;STAT3;TNF
cellular response to interleukin-15 (GO:0071350)	0.00197512	82.4091	645.352	CD4;STAT3
interleukin-15-mediated signaling pathway (GO:0035723)	0.00197512	82.4091	645.352	CD4;STAT3
negative regulation of reactive oxygen species biosynthetic process (GO:1903427)	0.00197512	82.4091	645.352	FYN;INS
positive regulation of insulin receptor signaling pathway (GO:0046628)	0.00197512	82.4091	645.352	PTPN11;INS
positive regulation of vascular endothelial cell proliferation (GO:1905564)	0.00197512	82.4091	645.352	PLCG1;FGF2
positive regulation of DNA metabolic process (GO:0051054)	0.00203513	23.1326	180.39	MYC;FGF2;EGFR
regulation of cell differentiation (GO:0045595)	0.00222607	12.4073	95.6031	BDNF;NANOG;TNF;INS
branching involved in blood vessel morphogenesis (GO:0001569)	0.00223967	75.5379	580.009	CTNNB1;VEGFA
response to UV-A (GO:0070141)	0.00223967	75.5379	580.009	AKT1;EGFR
vascular endothelial growth factor signaling pathway (GO:0038084)	0.00223967	75.5379	580.009	PIK3CA;VEGFA
negative regulation of neuroinflammatory response (GO:0150079)	0.00223967	75.5379	580.009	IL4;PTPRC
positive regulation of cellular response to insulin stimulus (GO:1900078)	0.00223967	75.5379	580.009	PTPN11;INS
positive regulation of glycogen biosynthetic process (GO:0045725)	0.00223967	75.5379	580.009	AKT1;INS
positive regulation of leukocyte degranulation (GO:0043302)	0.00223967	75.5379	580.009	IL4;ITGAM
vascular endothelial growth factor receptor signaling pathway (GO:0048010)	0.00237457	21.6824	165.154	PIK3CA;FYN;VEGFA
interferon-gamma-mediated signaling pathway (GO:0060333)	0.00246563	21.3478	161.676	IFNG;NCAM1;HLA-A
positive regulation of protein localization to nucleus (GO:1900182)	0.00246563	21.3478	161.676	IFNG;AKT1;INS
nervous system development (GO:0007399)	0.00249198	6.63707	50.0678	BDNF;STAT3;CXCR4;FGF2;NES;VEGFA
regulation of lymphocyte activation (GO:0051249)	0.00249198	69.7238	525.491	CD4;LCK
response to muscle stretch (GO:0035994)	0.00249198	69.7238	525.491	PIK3CA;CTNNB1
neurotrophin TRK receptor signaling pathway (GO:0048011)	0.00249198	69.7238	525.491	BDNF;CASP3
positive regulation of endothelial cell chemotaxis (GO:2001028)	0.00249198	69.7238	525.491	FGF2;VEGFA
positive regulation of glycogen metabolic process (GO:0070875)	0.00249198	69.7238	525.491	AKT1;INS
positive regulation of membrane protein ectodomain proteolysis (GO:0051044)	0.00249198	69.7238	525.491	IFNG;TNF
positive regulation of osteoclast differentiation (GO:0045672)	0.00249198	69.7238	525.491	IFNG;TNF
positive regulation of sprouting angiogenesis (GO:1903672)	0.00249198	69.7238	525.491	FGF2;VEGFA
wound healing (GO:0042060)	0.00260801	20.7084	155.073	ERBB2;FGF2;INS
regulation of G1/S transition of mitotic cell cycle (GO:2000045)	0.00269566	20.4029	151.937	AKT1;PTPN6;EGFR
regulation of glycolytic process (GO:0006110)	0.00269566	20.4029	151.937	IFNG;HIF1A;INS
phosphatidylinositol-mediated signaling (GO:0048015)	0.00269566	20.4029	151.937	PIK3CA;ERBB2;AKT1
positive regulation of neurogenesis (GO:0050769)	0.00274954	20.1062	148.904	IFNG;CTNNB1;VEGFA
regulation of blood vessel endothelial cell proliferation involved in sprouting angiogenesis (GO:1903587)	0.00274954	64.7403	479.381	FGF2;VEGFA
regulation of ERBB signaling pathway (GO:1901184)	0.00274954	64.7403	479.381	ERBB2;EGFR
regulation of isotype switching (GO:0045191)	0.00274954	64.7403	479.381	IL10;IL4
regulation of monocyte differentiation (GO:0045655)	0.00274954	64.7403	479.381	CD4;MYC
T cell mediated immunity (GO:0002456)	0.00274954	64.7403	479.381	CD8A;HLA-A
negative regulation of anoikis (GO:2000811)	0.00274954	64.7403	479.381	ITGB1;PIK3CA
negative regulation of macrophage activation (GO:0043031)	0.00274954	64.7403	479.381	IL4;PTPRC
insulin receptor signaling pathway (GO:0008286)	0.00285151	19.8179	145.969	PIK3CA;AKT1;INS
negative regulation of nucleic acid-templated transcription (GO:1903507)	0.00289482	6.38515	46.9161	IL4;IFNG;BIRC5;CTNNB1;TNF;TP53
regulation of peptide hormone secretion (GO:0090276)	0.0029429	19.5378	143.129	IFNG;TNF;INS
negative regulation of protein binding (GO:0032091)	0.0029429	19.5378	143.129	AKT1;NES;ACTB
neuron differentiation (GO:0030182)	0.00300372	11.0835	80.8505	CASP3;ERBB2;CTNNB1;VEGFA
regulation of cellular respiration (GO:0043457)	0.00300372	60.4212	439.926	IL4;IFNG
regulation of establishment of endothelial barrier (GO:1903140)	0.00300372	60.4212	439.926	TNF;VEGFA
cellular response to gamma radiation (GO:0071480)	0.00300372	60.4212	439.926	HRAS;TP53
regulation of neuroblast proliferation (GO:1902692)	0.00300372	60.4212	439.926	CTNNB1;VEGFA
regulation of stem cell proliferation (GO:0072091)	0.00300372	60.4212	439.926	PTPRC;NANOG
negative regulation of cytokine production involved in immune response (GO:0002719)	0.00300372	60.4212	439.926	IL10;TNF
positive regulation of cyclin-dependent protein serine/threonine kinase activity (GO:0045737)	0.00300372	60.4212	439.926	AKT1;EGFR
positive regulation of stem cell proliferation (GO:2000648)	0.00300372	60.4212	439.926	PTPRC;NANOG
positive regulation of apoptotic process (GO:0043065)	0.00306973	7.85646	57.0111	ITGB1;CASP3;CTNNB1;TNF;TP53
positive regulation of type I interferon production (GO:0032481)	0.0032085	18.7429	135.131	CTNNB1;PTPN11;GAPDH
regulation of oxidative stress-induced intrinsic apoptotic signaling pathway (GO:1902175)	0.00329516	56.642	405.821	AKT1;INS
regulation of transforming growth factor beta production (GO:0071634)	0.00329516	56.642	405.821	HIF1A;CD34
regulation of vascular endothelial cell proliferation (GO:1905562)	0.00329516	56.642	405.821	PLCG1;FGF2
interleukin-6-mediated signaling pathway (GO:0070102)	0.00329516	56.642	405.821	STAT3;PTPN11
leukocyte tethering or rolling (GO:0050901)	0.00329516	56.642	405.821	ITGB1;TNF
negative regulation of fibroblast proliferation (GO:0048147)	0.00329516	56.642	405.821	MYC;TP53
positive regulation of cell migration involved in sprouting angiogenesis (GO:0090050)	0.00329516	56.642	405.821	FGF2;VEGFA
negative regulation of extrinsic apoptotic signaling pathway (GO:2001237)	0.00350276	18.01	127.842	IL4;AKT1;TNF
positive regulation of cell adhesion (GO:0045785)	0.00350276	18.01	127.842	ERBB2;TNF;VEGFA
branching involved in ureteric bud morphogenesis (GO:0001658)	0.00362086	53.3075	376.079	MYC;FGF2
regulation of neuroinflammatory response (GO:0150077)	0.00362086	53.3075	376.079	IL4;TNF
leukocyte adhesion to vascular endothelial cell (GO:0061756)	0.00362086	53.3075	376.079	ITGB1;TNF
ureteric bud morphogenesis (GO:0060675)	0.00362086	53.3075	376.079	MYC;FGF2
regulation of cyclin-dependent protein serine/threonine kinase activity (GO:0000079)	0.00371539	17.5523	123.332	AKT1;EGFR;ACTB
regulation of interleukin-1 beta production (GO:0032651)	0.00382895	17.332	121.174	IFNG;STAT3;TNF
regulation of Notch signaling pathway (GO:0008593)	0.00382895	17.332	121.174	STAT3;AKT1;EGFR
adaptive immune response based on somatic recombination of immune receptors built from immunoglobulin superfamily domains (GO:0002460)	0.00390709	50.3434	349.938	CD8A;STAT3
regulation of acute inflammatory response (GO:0002673)	0.00390709	50.3434	349.938	IL4;INS
dopaminergic neuron differentiation (GO:0071542)	0.00390709	50.3434	349.938	CTNNB1;VEGFA
regulation of protein localization to cell periphery (GO:1904375)	0.00390709	50.3434	349.938	ACTB;INS
eye morphogenesis (GO:0048592)	0.00390709	50.3434	349.938	STAT3;VEGFA
mesoderm formation (GO:0001707)	0.00390709	50.3434	349.938	EOMES;ITGB1
positive regulation of cyclin-dependent protein kinase activity (GO:1904031)	0.00390709	50.3434	349.938	AKT1;EGFR
positive regulation of nitrogen compound metabolic process (GO:0051173)	0.00390709	50.3434	349.938	IFNG;TNF
glucose homeostasis (GO:0042593)	0.0041493	16.703	115.056	STAT3;HIF1A;INS
regulation of transcription from RNA polymerase II promoter in response to stress (GO:0043618)	0.00419692	16.5033	113.128	HIF1A;TP53;VEGFA
regulation of anoikis (GO:2000209)	0.00419692	47.6914	326.8	ITGB1;PIK3CA
regulation of fibroblast migration (GO:0010762)	0.00419692	47.6914	326.8	ITGB1;FGF2
regulation of lipid catabolic process (GO:0050994)	0.00419692	47.6914	326.8	TNF;INS
extrinsic apoptotic signaling pathway in absence of ligand (GO:0097192)	0.00419692	47.6914	326.8	IL4;CASP3
neurotrophin signaling pathway (GO:0038179)	0.00419692	47.6914	326.8	BDNF;CASP3
positive regulation of antigen receptor-mediated signaling pathway (GO:0050857)	0.00419692	47.6914	326.8	PTPRC;LCK
positive regulation of T cell cytokine production (GO:0002726)	0.00419692	47.6914	326.8	IL4;HLA-A
positive regulation of transcription from RNA polymerase II promoter involved in cellular response to chemical stimulus (GO:1901522)	0.00419692	47.6914	326.8	HIF1A;VEGFA
positive regulation of vascular associated smooth muscle cell proliferation (GO:1904707)	0.00419692	47.6914	326.8	IL10;FGF2
negative regulation of binding (GO:0051100)	0.00431679	16.3083	111.252	AKT1;NES;ACTB
regulation of endothelial cell migration (GO:0010594)	0.00443872	16.1179	109.426	AKT1;FGF2;VEGFA
positive regulation of inflammatory response (GO:0050729)	0.00443872	16.1179	109.426	IFNG;TNF;IL2
cellular response to nerve growth factor stimulus (GO:1990090)	0.00455152	45.3045	306.193	BDNF;AKT1
negative regulation of interleukin-2 production (GO:0032703)	0.00455152	45.3045	306.193	PTPRC;CD34
negative regulation of protein kinase activity (GO:0006469)	0.00455152	15.9318	107.649	PTPRC;IFNG;AKT1
positive regulation of transport (GO:0051050)	0.00468793	15.75	105.917	IFNG;TNF;ACTB
positive regulation of cellular component biogenesis (GO:0044089)	0.00482666	15.5722	104.231	IFNG;TNF;VEGFA
regulation of cysteine-type endopeptidase activity (GO:2000116)	0.00487584	43.145	287.736	SOX2;FYN
regulation of mononuclear cell migration (GO:0071675)	0.00487584	43.145	287.736	IL4;TNF
negative regulation of extrinsic apoptotic signaling pathway in absence of ligand (GO:2001240)	0.00487584	43.145	287.736	AKT1;TNF
negative regulation of signal transduction in absence of ligand (GO:1901099)	0.00487584	43.145	287.736	AKT1;TNF
positive regulation of morphogenesis of an epithelium (GO:1905332)	0.00487584	43.145	287.736	FGF2;VEGFA
positive regulation of protein autophosphorylation (GO:0031954)	0.00487584	43.145	287.736	INS;VEGFA
regulation of kinase activity (GO:0043549)	0.00503949	15.2285	100.985	CD4;ERBB2;EGFR
negative regulation of cellular protein metabolic process (GO:0032269)	0.00503949	15.2285	100.985	AKT1;GAPDH;INS
regulation of cytokine production involved in immune response (GO:0002718)	0.00523755	41.1818	271.12	IL10;TNF
regulation of monooxygenase activity (GO:0032768)	0.00523755	41.1818	271.12	AKT1;EGFR
negative regulation of lipid metabolic process (GO:0045833)	0.00523755	41.1818	271.12	TNF;INS
protein kinase B signaling (GO:0043491)	0.00523755	41.1818	271.12	AKT1;TNF
positive regulation of cold-induced thermogenesis (GO:0120162)	0.00545282	14.7402	96.4143	IL4;CXCR4;VEGFA
regulation of neuron apoptotic process (GO:0043523)	0.00557736	14.5843	94.9645	BDNF;CTNNB1;TNF
negative regulation of neuron death (GO:1901215)	0.00557736	14.5843	94.9645	BDNF;AKT1;CD34
positive regulation of defense response (GO:0031349)	0.00557736	14.5843	94.9645	IFNG;TNF;IL2
receptor signaling pathway via STAT (GO:0097696)	0.00559402	39.3893	256.092	IFNG;STAT3
regulation of calcium ion import (GO:0090279)	0.00559402	39.3893	256.092	CTNNB1;FYN
positive regulation of lipid metabolic process (GO:0045834)	0.00559402	39.3893	256.092	AKT1;INS
extracellular structure organization (GO:0043062)	0.00562816	8.86882	57.5871	ITGB1;ITGAM;PECAM1;FGF2
external encapsulating structure organization (GO:0045229)	0.0057113	8.82674	57.1644	ITGB1;ITGAM;PECAM1;FGF2
cellular response to drug (GO:0035690)	0.00594303	37.7462	242.443	MYC;TP53
regulation of glycogen biosynthetic process (GO:0005979)	0.00594303	37.7462	242.443	AKT1;INS
regulation of regulatory T cell differentiation (GO:0045589)	0.00594303	37.7462	242.443	IFNG;IL2
mononuclear cell differentiation (GO:1903131)	0.00594303	37.7462	242.443	IL4;VEGFA
negative regulation of macroautophagy (GO:0016242)	0.00594303	37.7462	242.443	PIK3CA;AKT1
positive regulation of G1/S transition of mitotic cell cycle (GO:1900087)	0.00594303	37.7462	242.443	AKT1;EGFR
camera-type eye development (GO:0043010)	0.00631028	36.2345	229.998	NES;VEGFA
cellular response to cadmium ion (GO:0071276)	0.00631028	36.2345	229.998	AKT1;EGFR
response to glucocorticoid (GO:0051384)	0.00631028	36.2345	229.998	IL10;TNF
negative regulation of catalytic activity (GO:0043086)	0.00631028	36.2345	229.998	NES;TP53
negative regulation of endothelial cell apoptotic process (GO:2000352)	0.00631028	36.2345	229.998	IL10;IL4
positive regulation of erythrocyte differentiation (GO:0045648)	0.00631028	36.2345	229.998	STAT3;HIF1A
positive regulation of nuclear division (GO:0051785)	0.00631028	36.2345	229.998	CD28;INS
small GTPase mediated signal transduction (GO:0007264)	0.00668272	13.4462	84.5287	FGF2;HRAS;TP53
regulation of B cell activation (GO:0050864)	0.00668272	34.8392	218.61	IL10;IL4
regulation of extrinsic apoptotic signaling pathway in absence of ligand (GO:2001239)	0.00668272	34.8392	218.61	AKT1;TNF
cellular response to interleukin-6 (GO:0071354)	0.00668272	34.8392	218.61	STAT3;PTPN11
regulation of protein transport (GO:0051223)	0.00668272	34.8392	218.61	TNF;INS
leukocyte cell-cell adhesion (GO:0007159)	0.00668272	34.8392	218.61	ITGB1;PECAM1
positive regulation of response to wounding (GO:1903036)	0.00668272	34.8392	218.61	ITGB1;HRAS
modulation of chemical synaptic transmission (GO:0050804)	0.00706005	13.0636	81.0827	ITGB1;BDNF;TNF
beta-catenin-TCF complex assembly (GO:1904837)	0.00706005	33.5471	208.155	MYC;CTNNB1
regulation of DNA biosynthetic process (GO:2000278)	0.00706005	33.5471	208.155	MYC;FGF2
regulation of T cell mediated cytotoxicity (GO:0001914)	0.00706005	33.5471	208.155	PTPRC;HLA-A
glial cell differentiation (GO:0010001)	0.00706005	33.5471	208.155	SOX2;STAT3
response to cadmium ion (GO:0046686)	0.00706005	33.5471	208.155	AKT1;EGFR
negative regulation of myeloid leukocyte differentiation (GO:0002762)	0.00706005	33.5471	208.155	IL4;MYC
regulation of protein serine/threonine kinase activity (GO:0071900)	0.00740575	12.8204	78.9084	IFNG;AKT1;ACTB
cellular protein modification process (GO:0006464)	0.00740618	3.9201	24.1192	PTPRC;LCK;ERBB2;AKT1;BIRC5;FYN;PTPN6;HIF1A
regulation of type I interferon-mediated signaling pathway (GO:0060338)	0.00744198	32.3474	198.526	PTPN11;PTPN6
respiratory tube development (GO:0030323)	0.00744198	32.3474	198.526	FGF2;VEGFA
negative regulation of Notch signaling pathway (GO:0045746)	0.00744198	32.3474	198.526	AKT1;EGFR
positive regulation of endopeptidase activity (GO:0010950)	0.00744198	32.3474	198.526	STAT3;FYN
positive regulation of phosphate metabolic process (GO:0045937)	0.00744198	32.3474	198.526	IFNG;EGFR
phosphatidylinositol metabolic process (GO:0046488)	0.00748567	12.7022	77.856	PIK3CA;PLCG1;FGF2
positive regulation of cellular component organization (GO:0051130)	0.00782824	12.472	75.8173	IFNG;TNF;VEGFA
activation of protein kinase B activity (GO:0032148)	0.00782824	31.2304	189.634	AKT1;INS
receptor signaling pathway via JAK-STAT (GO:0007259)	0.00782824	31.2304	189.634	IFNG;STAT3
negative regulation of peptidyl-tyrosine phosphorylation (GO:0050732)	0.00782824	31.2304	189.634	PTPRC;PTPN6
positive regulation of leukocyte cell-cell adhesion (GO:1903039)	0.00782824	31.2304	189.634	LCK;TNF
positive regulation of mononuclear cell migration (GO:0071677)	0.00782824	31.2304	189.634	IL4;TNF
positive regulation of protein metabolic process (GO:0051247)	0.00795338	12.36	74.8296	AKT1;TNF;INS
B cell proliferation (GO:0042100)	0.00825232	30.1879	181.399	IL10;PTPRC
regulation of cell migration involved in sprouting angiogenesis (GO:0090049)	0.00825232	30.1879	181.399	FGF2;VEGFA
hematopoietic progenitor cell differentiation (GO:0002244)	0.00825232	30.1879	181.399	PTPRC;TP53
positive regulation of receptor signaling pathway via STAT (GO:1904894)	0.00825232	30.1879	181.399	IL10;TNF
regulation of protein binding (GO:0043393)	0.00845179	12.0358	71.9864	AKT1;NES;ACTB
negative regulation of response to external stimulus (GO:0032102)	0.00845179	12.0358	71.9864	IL10;IL4;FGF2
positive regulation of cysteine-type endopeptidase activity involved in apoptotic process (GO:0043280)	0.00863884	11.9314	71.0767	LCK;MYC;TNF
regulation of interleukin-17 production (GO:0032660)	0.00866515	29.2126	173.755	IFNG;IL2
regulation of sprouting angiogenesis (GO:1903670)	0.00866515	29.2126	173.755	FGF2;VEGFA
negative regulation of smooth muscle cell proliferation (GO:0048662)	0.00866515	29.2126	173.755	IL10;IFNG
B cell receptor signaling pathway (GO:0050853)	0.00910098	28.2983	166.643	PTPRC;LCK
cellular response to vascular endothelial growth factor stimulus (GO:0035924)	0.00910098	28.2983	166.643	PIK3CA;VEGFA
regulation of transmembrane transport (GO:0034762)	0.00910098	28.2983	166.643	ACTB;INS
negative regulation of blood vessel endothelial cell migration (GO:0043537)	0.00910098	28.2983	166.643	FGF2;TNF
positive regulation of telomerase activity (GO:0051973)	0.00910098	28.2983	166.643	MYC;CTNNB1
regulation of anatomical structure morphogenesis (GO:0022603)	0.0093155	11.5314	67.6141	ERBB2;CTNNB1;FGF2
positive regulation of cell differentiation (GO:0045597)	0.00944185	7.38658	43.1967	AKT1;CTNNB1;CD34;INS
regulation of lipid biosynthetic process (GO:0046890)	0.00948607	27.4394	160.01	AKT1;INS
respiratory system development (GO:0060541)	0.00948607	27.4394	160.01	FGF2;VEGFA
lung development (GO:0030324)	0.00948607	27.4394	160.01	FGF2;VEGFA
peptidyl-tyrosine dephosphorylation (GO:0035335)	0.00948607	27.4394	160.01	PTPN11;PTPN6
positive regulation of cell cycle G1/S phase transition (GO:1902808)	0.00948607	27.4394	160.01	AKT1;EGFR
positive regulation of lipid biosynthetic process (GO:0046889)	0.00948607	27.4394	160.01	AKT1;INS
regulation of phosphorylation (GO:0042325)	0.00957722	11.3412	65.982	IL4;HIF1A;EGFR
regulation of protein secretion (GO:0050708)	0.00957722	11.3412	65.982	IFNG;TNF;INS
positive regulation of cytokine-mediated signaling pathway (GO:0001961)	0.00995076	26.631	153.813	CXCR4;HIF1A
positive regulation of mitotic nuclear division (GO:0045840)	0.00995076	26.631	153.813	CD28;INS
regulation of intracellular signal transduction (GO:1902531)	0.0102241	5.51095	31.6695	AKT1;TNF;TP53;EGFR;VEGFA
protein-containing complex assembly (GO:0065003)	0.0103418	7.13054	40.8228	MYC;CTNNB1;TNF;TP53
protein deubiquitination (GO:0016579)	0.0103418	7.13054	40.8228	MYC;HIF1A;TP53;ACTB
regulation of erythrocyte differentiation (GO:0045646)	0.0103418	25.8688	148.011	STAT3;HIF1A
regulation of protein autophosphorylation (GO:0031952)	0.0103418	25.8688	148.011	INS;VEGFA
regulation of vascular associated smooth muscle cell proliferation (GO:1904705)	0.0103418	25.8688	148.011	IL10;FGF2
negative regulation of epithelial cell apoptotic process (GO:1904036)	0.0103418	25.8688	148.011	IL10;IL4
positive regulation of myeloid cell differentiation (GO:0045639)	0.0103418	25.8688	148.011	STAT3;HIF1A
regulation of apoptotic signaling pathway (GO:2001233)	0.0108377	25.149	142.569	BDNF;TNF
lymphocyte proliferation (GO:0046651)	0.0108377	25.149	142.569	IL10;PTPRC
negative regulation of endothelial cell migration (GO:0010596)	0.0108377	25.149	142.569	FGF2;TNF
regulation of cellular component biogenesis (GO:0044087)	0.0113415	24.4681	137.457	PTPN11;GFAP
endothelial cell migration (GO:0043542)	0.0113415	24.4681	137.457	PIK3CA;VEGFA
response to peptide (GO:1901652)	0.0113415	24.4681	137.457	STAT3;FYN
protein modification by small protein removal (GO:0070646)	0.0114461	6.89146	38.6384	MYC;HIF1A;TP53;ACTB
negative regulation of inflammatory response to antigenic stimulus (GO:0002862)	0.0117278	10.3974	58.0229	IL10;FYN;PLCG1
bone development (GO:0060348)	0.0117639	23.823	132.646	PTPRC;TP53
stem cell differentiation (GO:0048863)	0.0117639	23.823	132.646	PTPRC;TP53
negative regulation of ERBB signaling pathway (GO:1901185)	0.0117639	23.823	132.646	ERBB2;EGFR
positive regulation of intrinsic apoptotic signaling pathway (GO:2001244)	0.0117639	23.823	132.646	LCK;TP53
positive regulation of wound healing (GO:0090303)	0.0117639	23.823	132.646	ITGB1;HRAS
regulation of inflammatory response to antigenic stimulus (GO:0002861)	0.0118362	10.3193	57.375	IL10;FYN;PLCG1
regulation of release of cytochrome c from mitochondria (GO:0090199)	0.0122347	23.211	128.111	AKT1;TP53
visual system development (GO:0150063)	0.0122347	23.211	128.111	SOX2;ITGAM
positive regulation of response to external stimulus (GO:0032103)	0.0122347	10.1666	56.1128	IFNG;TNF;IL2
protein dephosphorylation (GO:0006470)	0.0122347	10.1666	56.1128	PTPRC;PTPN11;PTPN6
neuron projection morphogenesis (GO:0048812)	0.0124594	10.0918	55.4979	BDNF;CTNNB1;ACTB
regulation of DNA recombination (GO:0000018)	0.0127555	22.6295	123.831	IL10;IL4
positive regulation of protein tyrosine kinase activity (GO:0061098)	0.0127555	22.6295	123.831	BDNF;FYN
Ras protein signal transduction (GO:0007265)	0.0128915	9.94562	54.2994	FGF2;HRAS;TP53
natural killer cell activation (GO:0030101)	0.0132842	22.0765	119.785	PTPRC;IL2
positive regulation of leukocyte mediated cytotoxicity (GO:0001912)	0.0132842	22.0765	119.785	ITGAM;HLA-A
positive regulation of biosynthetic process (GO:0009891)	0.0138455	21.5498	115.956	AKT1;INS
positive regulation of receptor-mediated endocytosis (GO:0048260)	0.0138455	21.5498	115.956	IL4;VEGFA
regulation of insulin receptor signaling pathway (GO:0046626)	0.014389	21.0476	112.328	PTPN11;INS
positive regulation of chemotaxis (GO:0050921)	0.014389	21.0476	112.328	FGF2;VEGFA
positive regulation of nervous system development (GO:0051962)	0.014389	21.0476	112.328	IFNG;BDNF
positive regulation of hydrolase activity (GO:0051345)	0.0145275	9.46543	50.4077	ITGB1;ERBB2;HRAS
extracellular matrix organization (GO:0030198)	0.0147061	6.32497	33.5945	ITGB1;ITGAM;PECAM1;FGF2
regulation of cellular protein localization (GO:1903827)	0.0148581	20.5682	108.885	BDNF;CTNNB1
erythrocyte differentiation (GO:0030218)	0.0148581	20.5682	108.885	CASP3;VEGFA
interleukin-12-mediated signaling pathway (GO:0035722)	0.0148581	20.5682	108.885	IL10;IFNG
positive regulation of nucleocytoplasmic transport (GO:0046824)	0.0148581	20.5682	108.885	IFNG;TP53
negative regulation of protein phosphorylation (GO:0001933)	0.0151889	9.27345	48.8714	PTPRC;AKT1;PTPN6
regulation of protein localization to nucleus (GO:1900180)	0.0154122	20.1101	105.615	AKT1;INS
regulation of T cell activation (GO:0050863)	0.0154122	20.1101	105.615	CD4;LCK
positive regulation of NF-kappaB transcription factor activity (GO:0051092)	0.0158875	9.08905	47.4067	STAT3;TNF;INS
cellular response to interleukin-12 (GO:0071349)	0.0158875	19.6719	102.505	IL10;IFNG
cellular response to ionizing radiation (GO:0071479)	0.0158875	19.6719	102.505	HRAS;TP53
cognition (GO:0050890)	0.0158875	19.6719	102.505	TNF;INS
inositol phosphate metabolic process (GO:0043647)	0.0158875	19.6719	102.505	PLCG1;FGF2
negative regulation of mitotic cell cycle (GO:0045930)	0.0158875	19.6719	102.505	IL10;CTNNB1
adherens junction organization (GO:0034332)	0.0164225	19.2524	99.545	CTNNB1;ACTB
regulation of cellular protein metabolic process (GO:0032268)	0.0164225	19.2524	99.545	AKT1;INS
regulation of stress-activated MAPK cascade (GO:0032872)	0.0164225	19.2524	99.545	MYC;EGFR
positive regulation of reactive oxygen species metabolic process (GO:2000379)	0.0164225	19.2524	99.545	ITGAM;TP53
protein autophosphorylation (GO:0046777)	0.0168129	8.8542	45.5572	ERBB2;AKT1;EGFR
regulation of interleukin-12 production (GO:0032655)	0.0176286	18.4647	94.0337	IL10;IFNG
mesenchymal cell differentiation (GO:0048762)	0.0176286	18.4647	94.0337	CTNNB1;HIF1A
positive regulation of fat cell differentiation (GO:0045600)	0.0176286	18.4647	94.0337	AKT1;INS
regulation of intrinsic apoptotic signaling pathway (GO:2001242)	0.0182112	18.0945	91.4651	LCK;TP53
response to peptide hormone (GO:0043434)	0.0182112	18.0945	91.4651	STAT3;AKT1
negative regulation of protein metabolic process (GO:0051248)	0.0182112	18.0945	91.4651	EGFR;INS
cellular response to oxygen-containing compound (GO:1901701)	0.0182173	5.86207	29.6196	IL10;AKT1;EGFR;ACTB
epidermal cell differentiation (GO:0009913)	0.0187994	17.7389	89.0106	CASP3;CTNNB1
positive regulation of NIK/NF-kappaB signaling (GO:1901224)	0.0187994	17.7389	89.0106	TNF;EGFR
regulation of proteolysis (GO:0030162)	0.0194603	17.3969	86.6633	AKT1;INS
cell-cell adhesion via plasma-membrane adhesion molecules (GO:0098742)	0.0198321	8.2664	41.0087	ITGB1;ITGAM;PECAM1
negative regulation of protein modification by small protein conjugation or removal (GO:1903321)	0.02005	17.0678	84.4165	AKT1;CTNNB1
positive regulation of response to DNA damage stimulus (GO:2001022)	0.02005	17.0678	84.4165	MYC;EGFR
positive regulation of I-kappaB kinase/NF-kappaB signaling (GO:0043123)	0.02005	8.21678	40.6302	CD4;TNF;GAPDH
protein-containing complex disassembly (GO:0032984)	0.0207023	16.7508	82.2643	MYC;CTNNB1
cellular response to peptide (GO:1901653)	0.021314	16.4455	80.201	FYN;TP53
positive regulation of cell junction assembly (GO:1901890)	0.021314	16.4455	80.201	BDNF;VEGFA
positive regulation of proteolysis (GO:0045862)	0.021314	16.4455	80.201	IFNG;TNF
positive regulation of developmental process (GO:0051094)	0.021849	7.93103	38.4678	TNF;INS;VEGFA
regulation of calcium ion transport (GO:0051924)	0.0219306	16.151	78.2217	CD4;CTNNB1
positive regulation of mitotic cell cycle phase transition (GO:1901992)	0.0219306	16.151	78.2217	AKT1;EGFR
regulation of translation (GO:0006417)	0.0220378	7.88532	38.1246	ERBB2;CD28;GAPDH
negative regulation of immune response (GO:0050777)	0.0220378	7.88532	38.1246	IL10;FYN;PLCG1
homophilic cell adhesion via plasma membrane adhesion molecules (GO:0007156)	0.0232958	15.5925	74.4958	ITGB1;PECAM1
regulation of DNA-templated transcription, initiation (GO:2000142)	0.0239693	15.3274	72.7408	CTNNB1;TP53
positive regulation of interleukin-8 production (GO:0032757)	0.0239693	15.3274	72.7408	STAT3;TNF
I-kappaB kinase/NF-kappaB signaling (GO:0007249)	0.0246491	15.0712	71.0526	AKT1;TNF
negative regulation of kinase activity (GO:0033673)	0.0246491	15.0712	71.0526	PTPRC;AKT1
cellular response to reactive oxygen species (GO:0034614)	0.0252928	14.8234	69.4277	AKT1;EGFR
negative regulation of endopeptidase activity (GO:0010951)	0.0252928	14.8234	69.4277	AKT1;GAPDH
negative regulation of peptidase activity (GO:0010466)	0.0252928	14.8234	69.4277	AKT1;GAPDH
regulation of GTPase activity (GO:0043087)	0.0255587	7.41485	34.6387	ITGB1;ERBB2;HRAS
regulation of extrinsic apoptotic signaling pathway (GO:2001236)	0.0258546	14.5836	67.8626	IL4;TNF
regulation of innate immune response (GO:0045088)	0.0258546	14.5836	67.8626	PTPN11;PTPN6
regulation of transcription initiation from RNA polymerase II promoter (GO:0060260)	0.0258546	14.5836	67.8626	CTNNB1;TP53
negative regulation of intrinsic apoptotic signaling pathway (GO:2001243)	0.0258546	14.5836	67.8626	AKT1;INS
cellular response to tumor necrosis factor (GO:0071356)	0.0272064	7.21892	33.2124	AKT1;TNF;TP53
cell-cell junction assembly (GO:0007043)	0.0272483	14.1264	64.9002	CTNNB1;ACTB
embryonic organ development (GO:0048568)	0.0272483	14.1264	64.9002	TNF;NES
positive regulation of cell cycle (GO:0045787)	0.0272483	14.1264	64.9002	AKT1;EGFR
regulation of epidermal growth factor receptor signaling pathway (GO:0042058)	0.027908	13.9084	63.4973	AKT1;EGFR
regulation of gene silencing by miRNA (GO:0060964)	0.027908	13.9084	63.4973	STAT3;POU5F1
regulation of viral genome replication (GO:0045069)	0.027908	13.9084	63.4973	CD28;TNF
cell chemotaxis (GO:0060326)	0.028292	13.4919	60.8352	CXCR4;VEGFA
generation of neurons (GO:0048699)	0.028292	6.92591	31.1085	CASP3;ERBB2;CTNNB1
carbohydrate homeostasis (GO:0033500)	0.028292	13.2928	59.5716	STAT3;INS
cellular response to light stimulus (GO:0071482)	0.028292	13.2928	59.5716	MYC;TP53
regulation of adherens junction organization (GO:1903391)	0.028292	110.833	495.416	VEGFA
regulation of core promoter binding (GO:1904796)	0.028292	110.833	495.416	IFNG
cell-cell adhesion mediated by integrin (GO:0033631)	0.028292	110.833	495.416	ITGB1
cellular response to antibiotic (GO:0071236)	0.028292	110.833	495.416	TP53
regulation of Fc-gamma receptor signaling pathway involved in phagocytosis (GO:1905449)	0.028292	110.833	495.416	PTPRC
regulation of fever generation (GO:0031620)	0.028292	110.833	495.416	TNF
cellular response to indole-3-methanol (GO:0071681)	0.028292	110.833	495.416	CTNNB1
cellular response to nicotine (GO:0071316)	0.028292	110.833	495.416	TNF
regulation of granulocyte colony-stimulating factor production (GO:0071655)	0.028292	110.833	495.416	CD34
regulation of hippocampal neuron apoptotic process (GO:0110089)	0.028292	110.833	495.416	ITGAM
regulation of hydrogen peroxide biosynthetic process (GO:0010728)	0.028292	110.833	495.416	FYN
chemokine (C-X-C motif) ligand 12 signaling pathway (GO:0038146)	0.028292	110.833	495.416	CXCR4
regulation of inward rectifier potassium channel activity (GO:1901979)	0.028292	110.833	495.416	ITGB1
chronic inflammatory response (GO:0002544)	0.028292	110.833	495.416	TNF
coronary artery morphogenesis (GO:0060982)	0.028292	110.833	495.416	VEGFA
regulation of microglial cell mediated cytotoxicity (GO:1904149)	0.028292	110.833	495.416	ITGAM
regulation of miRNA metabolic process (GO:2000628)	0.028292	110.833	495.416	HRAS
regulation of neutrophil degranulation (GO:0043313)	0.028292	110.833	495.416	ITGAM
embryonic skeletal joint morphogenesis (GO:0060272)	0.028292	110.833	495.416	CTNNB1
regulation of protein kinase C activity (GO:1900019)	0.028292	110.833	495.416	EGFR
endothelial cell apoptotic process (GO:0072577)	0.028292	110.833	495.416	IL10
regulation of respiratory burst involved in inflammatory response (GO:0060264)	0.028292	110.833	495.416	INS
regulation of retinal ganglion cell axon guidance (GO:0090259)	0.028292	110.833	495.416	VEGFA
extracellular exosome biogenesis (GO:0097734)	0.028292	110.833	495.416	CD34
response to indole-3-methanol (GO:0071680)	0.028292	110.833	495.416	CTNNB1
response to salt stress (GO:0009651)	0.028292	110.833	495.416	TNF
membrane raft distribution (GO:0031580)	0.028292	110.833	495.416	PTPRC
vascular endothelial growth factor receptor-2 signaling pathway (GO:0036324)	0.028292	110.833	495.416	VEGFA
monocyte extravasation (GO:0035696)	0.028292	110.833	495.416	PECAM1
negative regulation of gene silencing by RNA (GO:0060967)	0.028292	110.833	495.416	POU5F1
negative regulation of hydrogen peroxide metabolic process (GO:0010727)	0.028292	110.833	495.416	FYN
negative regulation of hydrogen peroxide-induced neuron death (GO:1903208)	0.028292	110.833	495.416	IL10
negative regulation of interferon-alpha production (GO:0032687)	0.028292	110.833	495.416	IL10
negative regulation of myosin-light-chain-phosphatase activity (GO:0035509)	0.028292	110.833	495.416	TNF
negative regulation of oxidative stress-induced neuron intrinsic apoptotic signaling pathway (GO:1903377)	0.028292	110.833	495.416	HIF1A
negative regulation of posttranscriptional gene silencing (GO:0060149)	0.028292	110.833	495.416	POU5F1
peptidyl-cysteine S-nitrosylation (GO:0018119)	0.028292	110.833	495.416	GAPDH
positive regulation of axon extension involved in axon guidance (GO:0048842)	0.028292	110.833	495.416	VEGFA
positive regulation of CD4-positive, CD25-positive, alpha-beta regulatory T cell differentiation (GO:0032831)	0.028292	110.833	495.416	IFNG
positive regulation of cell fate commitment (GO:0010455)	0.028292	110.833	495.416	FGF2
positive regulation of deoxyribonuclease activity (GO:0032077)	0.028292	110.833	495.416	AKT1
positive regulation of endothelial cell chemotaxis by VEGF-activated vascular endothelial growth factor receptor signaling pathway (GO:0038033)	0.028292	110.833	495.416	VEGFA
positive regulation of glial cell proliferation (GO:0060252)	0.028292	110.833	495.416	TNF
positive regulation of heat generation (GO:0031652)	0.028292	110.833	495.416	TNF
positive regulation of mast cell activation involved in immune response (GO:0033008)	0.028292	110.833	495.416	IL4
positive regulation of mast cell chemotaxis (GO:0060754)	0.028292	110.833	495.416	VEGFA
positive regulation of metallopeptidase activity (GO:1905050)	0.028292	110.833	495.416	STAT3
positive regulation of protein kinase C activity (GO:1900020)	0.028292	110.833	495.416	EGFR
regulation of endopeptidase activity (GO:0052548)	0.0286486	13.0995	58.35	AKT1;GAPDH
negative regulation of neuron apoptotic process (GO:0043524)	0.0286486	13.0995	58.35	BDNF;HIF1A
response to ionizing radiation (GO:0010212)	0.0293801	12.9117	57.1686	MYC;TP53
positive regulation of synaptic transmission (GO:0050806)	0.0301186	12.7292	56.0254	TNF;INS
fibroblast growth factor receptor signaling pathway (GO:0008543)	0.0316161	12.3792	53.8472	PTPN11;FGF2
regulation of transcription from RNA polymerase II promoter in response to hypoxia (GO:0061418)	0.0316161	12.3792	53.8472	HIF1A;VEGFA
positive regulation of GTPase activity (GO:0043547)	0.03198	6.52805	28.3104	ITGB1;ERBB2;HRAS
regulation of cell division (GO:0051302)	0.03198	12.2113	52.8089	MYC;POU5F1
establishment of protein localization to organelle (GO:0072594)	0.03198	12.2113	52.8089	STAT3;AKT1
protein import into nucleus (GO:0006606)	0.03198	12.2113	52.8089	STAT3;AKT1
cellular response to UV (GO:0034644)	0.03198	12.0479	51.8026	MYC;TP53
import into nucleus (GO:0051170)	0.03198	12.0479	51.8026	STAT3;AKT1
activation of Janus kinase activity (GO:0042976)	0.03198	88.6622	380.247	IL4
protein-DNA complex subunit organization (GO:0071824)	0.03198	88.6622	380.247	MYC
radial glial cell differentiation (GO:0060019)	0.03198	88.6622	380.247	STAT3
regulation of cellular response to hypoxia (GO:1900037)	0.03198	88.6622	380.247	CD34
cellular response to granulocyte macrophage colony-stimulating factor stimulus (GO:0097011)	0.03198	88.6622	380.247	CD4
regulation of glutamate receptor signaling pathway (GO:1900449)	0.03198	88.6622	380.247	FYN
regulation of hormone biosynthetic process (GO:0046885)	0.03198	88.6622	380.247	HIF1A
regulation of long-chain fatty acid import across plasma membrane (GO:0010746)	0.03198	88.6622	380.247	AKT1
regulation of mast cell chemotaxis (GO:0060753)	0.03198	88.6622	380.247	VEGFA
embryonic camera-type eye development (GO:0031076)	0.03198	88.6622	380.247	NES
regulation of thymocyte apoptotic process (GO:0070243)	0.03198	88.6622	380.247	TP53
response to granulocyte macrophage colony-stimulating factor (GO:0097012)	0.03198	88.6622	380.247	CD4
T-helper 17 cell lineage commitment (GO:0072540)	0.03198	88.6622	380.247	STAT3
venous blood vessel morphogenesis (GO:0048845)	0.03198	88.6622	380.247	VEGFA
morphogenesis of an endothelium (GO:0003159)	0.03198	88.6622	380.247	CTNNB1
negative regulation of actin filament depolymerization (GO:0030835)	0.03198	88.6622	380.247	PIK3CA
negative regulation of cellular response to hypoxia (GO:1900038)	0.03198	88.6622	380.247	CD34
negative regulation of fibroblast migration (GO:0010764)	0.03198	88.6622	380.247	FGF2
negative regulation of morphogenesis of an epithelium (GO:1905331)	0.03198	88.6622	380.247	TNF
neutrophil extravasation (GO:0072672)	0.03198	88.6622	380.247	PECAM1
oxygen homeostasis (GO:0032364)	0.03198	88.6622	380.247	HIF1A
positive regulation of animal organ morphogenesis (GO:0110110)	0.03198	88.6622	380.247	CD34
positive regulation of deacetylase activity (GO:0090045)	0.03198	88.6622	380.247	VEGFA
positive regulation of fever generation (GO:0031622)	0.03198	88.6622	380.247	TNF
positive regulation of kidney development (GO:0090184)	0.03198	88.6622	380.247	MYC
positive regulation of killing of cells of other organism (GO:0051712)	0.03198	88.6622	380.247	IFNG
positive regulation of receptor binding (GO:1900122)	0.03198	88.6622	380.247	BDNF
protection from natural killer cell mediated cytotoxicity (GO:0042270)	0.03198	88.6622	380.247	HLA-A
regulation of neuron differentiation (GO:0045664)	0.0331617	11.7338	49.8804	SOX2;BDNF
regulation of fat cell differentiation (GO:0045598)	0.0337705	11.5828	48.962	AKT1;TNF
regulation of NIK/NF-kappaB signaling (GO:1901222)	0.0337705	11.5828	48.962	TNF;EGFR
negative regulation of cellular component organization (GO:0051129)	0.0337705	11.5828	48.962	TNF;VEGFA
negative regulation of cellular response to growth factor stimulus (GO:0090288)	0.0337705	11.5828	48.962	IL4;FGF2
regulation of I-kappaB kinase/NF-kappaB signaling (GO:0043122)	0.0341358	6.22951	26.2572	CD4;TNF;GAPDH
activation of cysteine-type endopeptidase activity involved in apoptotic process (GO:0006919)	0.0344693	11.4356	48.0704	LCK;TNF
positive regulation of cytoskeleton organization (GO:0051495)	0.0344693	11.292	47.2047	HRAS;NES
positive regulation of plasma membrane bounded cell projection assembly (GO:0120034)	0.0344693	11.1521	46.3638	PIK3CA;HRAS
antigen processing and presentation of endogenous peptide antigen via MHC class I via ER pathway (GO:0002484)	0.0344693	73.8815	305.551	HLA-A
antigen processing and presentation of endogenous peptide antigen via MHC class I via ER pathway, TAP-independent (GO:0002486)	0.0344693	73.8815	305.551	HLA-A
astrocyte differentiation (GO:0048708)	0.0344693	73.8815	305.551	STAT3
regulation of blood-brain barrier permeability (GO:1905603)	0.0344693	73.8815	305.551	VEGFA
regulation of dopamine metabolic process (GO:0042053)	0.0344693	73.8815	305.551	ITGAM
regulation of endothelial cell chemotaxis to fibroblast growth factor (GO:2000544)	0.0344693	73.8815	305.551	FGF2
cellular response to interleukin-18 (GO:0071351)	0.0344693	73.8815	305.551	AKT1
regulation of histone deacetylase activity (GO:1901725)	0.0344693	73.8815	305.551	VEGFA
chemical homeostasis within a tissue (GO:0048875)	0.0344693	73.8815	305.551	VEGFA
regulation of lens fiber cell differentiation (GO:1902746)	0.0344693	73.8815	305.551	FGF2
death-inducing signaling complex assembly (GO:0071550)	0.0344693	73.8815	305.551	TNF
regulation of miRNA mediated inhibition of translation (GO:1905616)	0.0344693	73.8815	305.551	STAT3
detection of muscle stretch (GO:0035995)	0.0344693	73.8815	305.551	CTNNB1
regulation of myosin-light-chain-phosphatase activity (GO:0035507)	0.0344693	73.8815	305.551	TNF
regulation of NAD(P)H oxidase activity (GO:0033860)	0.0344693	73.8815	305.551	INS
regulation of oxidative stress-induced neuron intrinsic apoptotic signaling pathway (GO:1903376)	0.0344693	73.8815	305.551	HIF1A
regulation of skeletal muscle satellite cell proliferation (GO:0014842)	0.0344693	73.8815	305.551	FGF2
gas homeostasis (GO:0033483)	0.0344693	73.8815	305.551	HIF1A
regulation of transforming growth factor beta2 production (GO:0032909)	0.0344693	73.8815	305.551	HIF1A
interleukin-18-mediated signaling pathway (GO:0035655)	0.0344693	73.8815	305.551	AKT1
sphingosine-1-phosphate receptor signaling pathway (GO:0003376)	0.0344693	73.8815	305.551	AKT1
surfactant homeostasis (GO:0043129)	0.0344693	73.8815	305.551	VEGFA
T cell apoptotic process (GO:0070231)	0.0344693	73.8815	305.551	AKT1
T-helper 17 cell differentiation (GO:0072539)	0.0344693	73.8815	305.551	STAT3
vascular associated smooth muscle cell development (GO:0097084)	0.0344693	73.8815	305.551	VEGFA
negative regulation of cardiocyte differentiation (GO:1905208)	0.0344693	73.8815	305.551	EGFR
negative regulation of glycogen metabolic process (GO:0070874)	0.0344693	73.8815	305.551	INS
negative regulation of membrane protein ectodomain proteolysis (GO:0051045)	0.0344693	73.8815	305.551	IL10
negative regulation of protein sumoylation (GO:0033234)	0.0344693	73.8815	305.551	CTNNB1
negative regulation of stress-activated protein kinase signaling cascade (GO:0070303)	0.0344693	73.8815	305.551	MYC
negative regulation of T-helper 17 type immune response (GO:2000317)	0.0344693	73.8815	305.551	IL4
oxygen transport (GO:0015671)	0.0344693	73.8815	305.551	MYC
photoreceptor cell differentiation (GO:0046530)	0.0344693	73.8815	305.551	STAT3
pituitary gland development (GO:0021983)	0.0344693	73.8815	305.551	SOX2
positive regulation of amyloid-beta clearance (GO:1900223)	0.0344693	73.8815	305.551	IL4
positive regulation of chemokine (C-X-C motif) ligand 2 production (GO:2000343)	0.0344693	73.8815	305.551	TNF
positive regulation of epithelial tube formation (GO:1905278)	0.0344693	73.8815	305.551	FGF2
positive regulation of gliogenesis (GO:0014015)	0.0344693	73.8815	305.551	TNF
positive regulation of hormone metabolic process (GO:0032352)	0.0344693	73.8815	305.551	HIF1A
positive regulation of interleukin-23 production (GO:0032747)	0.0344693	73.8815	305.551	IFNG
positive regulation of lymphocyte apoptotic process (GO:0070230)	0.0344693	73.8815	305.551	IL10
positive regulation of miRNA mediated inhibition of translation (GO:1905618)	0.0344693	73.8815	305.551	STAT3
positive regulation of miRNA metabolic process (GO:2000630)	0.0344693	73.8815	305.551	HRAS
positive regulation of mitochondrial membrane potential (GO:0010918)	0.0344693	73.8815	305.551	AKT1
positive regulation of podosome assembly (GO:0071803)	0.0344693	73.8815	305.551	TNF
positive regulation of respiratory burst (GO:0060267)	0.0344693	73.8815	305.551	INS
positive regulation of RNA polymerase II transcription preinitiation complex assembly (GO:0045899)	0.0344693	73.8815	305.551	TP53
positive regulation of trophoblast cell migration (GO:1901165)	0.0344693	73.8815	305.551	VEGFA
negative regulation of defense response (GO:0031348)	0.0351888	10.8823	44.7522	IL10;IL4
positive regulation of protein catabolic process (GO:0045732)	0.0351888	10.8823	44.7522	IFNG;TNF
negative regulation of angiogenesis (GO:0016525)	0.0367194	10.6251	43.2285	CTNNB1;TNF
regulation of type I interferon production (GO:0032479)	0.0370088	10.3798	41.786	CTNNB1;GAPDH
second-messenger-mediated signaling (GO:0019932)	0.0370088	10.3798	41.786	CXCR4;PLCG1
protein import (GO:0017038)	0.0370088	10.3798	41.786	STAT3;AKT1
membrane organization (GO:0061024)	0.0370088	5.75508	23.0816	CD4;EGFR;ACTB
positive regulation of autophagy (GO:0010508)	0.0370088	10.2614	41.0934	IL4;IFNG
antigen processing and presentation of endogenous peptide antigen via MHC class I (GO:0019885)	0.0370088	63.3238	253.503	HLA-A
antigen processing and presentation of exogenous peptide antigen via MHC class I, TAP-independent (GO:0002480)	0.0370088	63.3238	253.503	HLA-A
regulation of CD8-positive, alpha-beta T cell proliferation (GO:2000564)	0.0370088	63.3238	253.503	HLA-A
regulation of chaperone-mediated autophagy (GO:1904714)	0.0370088	63.3238	253.503	GFAP
regulation of chemokine (C-C motif) ligand 5 production (GO:0071649)	0.0370088	63.3238	253.503	IL10
regulation of chemokine-mediated signaling pathway (GO:0070099)	0.0370088	63.3238	253.503	HIF1A
regulation of collateral sprouting (GO:0048670)	0.0370088	63.3238	253.503	BDNF
regulation of endodeoxyribonuclease activity (GO:0032071)	0.0370088	63.3238	253.503	AKT1
cellular response to interleukin-21 (GO:0098757)	0.0370088	63.3238	253.503	STAT3
regulation of interleukin-18 production (GO:0032661)	0.0370088	63.3238	253.503	IL10
coronary vasculature morphogenesis (GO:0060977)	0.0370088	63.3238	253.503	VEGFA
cytoplasmic sequestering of NF-kappaB (GO:0007253)	0.0370088	63.3238	253.503	IL10
dendritic spine maintenance (GO:0097062)	0.0370088	63.3238	253.503	FYN
regulation of positive chemotaxis (GO:0050926)	0.0370088	63.3238	253.503	VEGFA
regulation of protein ADP-ribosylation (GO:0010835)	0.0370088	63.3238	253.503	IFNG
entry of bacterium into host cell (GO:0035635)	0.0370088	63.3238	253.503	CTNNB1
ER overload response (GO:0006983)	0.0370088	63.3238	253.503	TP53
regulation of response to wounding (GO:1903034)	0.0370088	63.3238	253.503	IL10
regulation of transcription from RNA polymerase II promoter in response to oxidative stress (GO:0043619)	0.0370088	63.3238	253.503	HIF1A
regulation of vascular wound healing (GO:0061043)	0.0370088	63.3238	253.503	TNF
hair cell differentiation (GO:0035315)	0.0370088	63.3238	253.503	CTNNB1
interleukin-21-mediated signaling pathway (GO:0038114)	0.0370088	63.3238	253.503	STAT3
stress-induced premature senescence (GO:0090400)	0.0370088	63.3238	253.503	TP53
mammary gland epithelial cell differentiation (GO:0060644)	0.0370088	63.3238	253.503	AKT1
T cell mediated cytotoxicity (GO:0001913)	0.0370088	63.3238	253.503	HLA-A
T-helper cell lineage commitment (GO:0002295)	0.0370088	63.3238	253.503	STAT3
natural killer cell differentiation (GO:0001779)	0.0370088	63.3238	253.503	PTPRC
negative regulation of B cell apoptotic process (GO:0002903)	0.0370088	63.3238	253.503	IL2
negative regulation of fatty acid oxidation (GO:0046322)	0.0370088	63.3238	253.503	AKT1
negative regulation of microglial cell activation (GO:1903979)	0.0370088	63.3238	253.503	PTPRC
negative regulation of T cell mediated cytotoxicity (GO:0001915)	0.0370088	63.3238	253.503	PTPRC
negative regulation of T-helper 17 cell differentiation (GO:2000320)	0.0370088	63.3238	253.503	IL4
phosphatidylinositol-3-phosphate biosynthetic process (GO:0036092)	0.0370088	63.3238	253.503	PIK3CA
positive regulation of cell migration by vascular endothelial growth factor signaling pathway (GO:0038089)	0.0370088	63.3238	253.503	VEGFA
positive regulation of execution phase of apoptosis (GO:1900119)	0.0370088	63.3238	253.503	TP53
positive regulation of fibroblast migration (GO:0010763)	0.0370088	63.3238	253.503	ITGB1
positive regulation of isomerase activity (GO:0010912)	0.0370088	63.3238	253.503	ITGAM
positive regulation of oligodendrocyte differentiation (GO:0048714)	0.0370088	63.3238	253.503	CXCR4
positive regulation of peptide secretion (GO:0002793)	0.0370088	63.3238	253.503	INS
positive regulation of T-helper 2 cell cytokine production (GO:2000553)	0.0370088	63.3238	253.503	IL4
cellular response to fibroblast growth factor stimulus (GO:0044344)	0.0384684	10.0323	39.7618	PTPN11;FGF2
negative regulation of MAPK cascade (GO:0043409)	0.039718	9.81324	38.4975	PTPRC;MYC
regulation of canonical Wnt signaling pathway (GO:0060828)	0.039718	5.49879	21.4133	SOX2;CTNNB1;EGFR
actin-mediated cell contraction (GO:0070252)	0.039718	55.4056	215.341	PIK3CA
regulation of actin filament organization (GO:0110053)	0.039718	55.4056	215.341	PIK3CA
regulation of CD8-positive, alpha-beta T cell activation (GO:2001185)	0.039718	55.4056	215.341	HLA-A
CD40 signaling pathway (GO:0023035)	0.039718	55.4056	215.341	ITGB1
regulation of endothelial cell development (GO:1901550)	0.039718	55.4056	215.341	TNF
cellular response to interleukin-9 (GO:0071355)	0.039718	55.4056	215.341	STAT3
regulation of glial cell proliferation (GO:0060251)	0.039718	55.4056	215.341	TNF
cellular response to leptin stimulus (GO:0044320)	0.039718	55.4056	215.341	STAT3
regulation of glucan biosynthetic process (GO:0010962)	0.039718	55.4056	215.341	AKT1
regulation of helicase activity (GO:0051095)	0.039718	55.4056	215.341	TP53
regulation of interleukin-23 production (GO:0032667)	0.039718	55.4056	215.341	IFNG
regulation of nephron tubule epithelial cell differentiation (GO:0072182)	0.039718	55.4056	215.341	CTNNB1
regulation of protein deacetylation (GO:0090311)	0.039718	55.4056	215.341	IFNG
endothelial cell chemotaxis (GO:0035767)	0.039718	55.4056	215.341	VEGFA
epithelial cell apoptotic process (GO:1904019)	0.039718	55.4056	215.341	IL10
regulation of respiratory burst (GO:0060263)	0.039718	55.4056	215.341	INS
regulation of smooth muscle cell apoptotic process (GO:0034391)	0.039718	55.4056	215.341	IFNG
glomerular filtration (GO:0003094)	0.039718	55.4056	215.341	CD34
response to leptin (GO:0044321)	0.039718	55.4056	215.341	STAT3
interleukin-23-mediated signaling pathway (GO:0038155)	0.039718	55.4056	215.341	STAT3
interleukin-9-mediated signaling pathway (GO:0038113)	0.039718	55.4056	215.341	STAT3
sympathetic ganglion development (GO:0061549)	0.039718	55.4056	215.341	CTNNB1
synapse pruning (GO:0098883)	0.039718	55.4056	215.341	ITGAM
mesodermal cell differentiation (GO:0048333)	0.039718	55.4056	215.341	ITGB1
negative regulation of lipid localization (GO:1905953)	0.039718	55.4056	215.341	TNF
negative regulation of nitric oxide biosynthetic process (GO:0045019)	0.039718	55.4056	215.341	CD34
negative regulation of nitric oxide metabolic process (GO:1904406)	0.039718	55.4056	215.341	CD34
negative regulation of protein-containing complex disassembly (GO:0043242)	0.039718	55.4056	215.341	TNF
positive regulation of ATP biosynthetic process (GO:2001171)	0.039718	55.4056	215.341	IL4
positive regulation of blood vessel endothelial cell proliferation involved in sprouting angiogenesis (GO:1903589)	0.039718	55.4056	215.341	VEGFA
positive regulation of CD8-positive, alpha-beta T cell activation (GO:2001187)	0.039718	55.4056	215.341	HLA-A
positive regulation of mast cell degranulation (GO:0043306)	0.039718	55.4056	215.341	IL4
positive regulation of membrane potential (GO:0045838)	0.039718	55.4056	215.341	AKT1
positive regulation of protein kinase C signaling (GO:0090037)	0.039718	55.4056	215.341	VEGFA
positive regulation of smooth muscle cell apoptotic process (GO:0034393)	0.039718	55.4056	215.341	IFNG
cellular transition metal ion homeostasis (GO:0046916)	0.039792	9.60348	37.2959	LCK;MYC
positive regulation of stress-activated MAPK cascade (GO:0032874)	0.0418058	9.30506	35.6017	HRAS;VEGFA
cell-matrix adhesion (GO:0007160)	0.0418058	9.20965	35.0639	ITGB1;CD34
positive regulation of translation (GO:0045727)	0.0418058	9.20965	35.0639	ERBB2;CD28
epithelial cell differentiation (GO:0030855)	0.0418058	9.11616	34.5388	AKT1;VEGFA
positive regulation of cell cycle process (GO:0090068)	0.0418058	9.11616	34.5388	CD28;INS
apical protein localization (GO:0045176)	0.0418058	49.2469	186.271	ACTB
regulation of axon guidance (GO:1902667)	0.0418058	49.2469	186.271	VEGFA
regulation of cell-cell adhesion involved in gastrulation (GO:0070587)	0.0418058	49.2469	186.271	IL10
regulation of DNA methylation (GO:0044030)	0.0418058	49.2469	186.271	MYC
regulation of epithelial cell apoptotic process (GO:1904035)	0.0418058	49.2469	186.271	TNF
cellular response to oxidised low-density lipoprotein particle stimulus (GO:0140052)	0.0418058	49.2469	186.271	AKT1
DNA damage response, signal transduction by p53 class mediator resulting in transcription of p21 class mediator (GO:0006978)	0.0418058	49.2469	186.271	TP53
ectoderm development (GO:0007398)	0.0418058	49.2469	186.271	ITGAM
regulation of podosome assembly (GO:0071801)	0.0418058	49.2469	186.271	TNF
endothelial tube morphogenesis (GO:0061154)	0.0418058	49.2469	186.271	CTNNB1
regulation of protein neddylation (GO:2000434)	0.0418058	49.2469	186.271	HIF1A
regulation of receptor binding (GO:1900120)	0.0418058	49.2469	186.271	BDNF
regulation of RNA polymerase II transcription preinitiation complex assembly (GO:0045898)	0.0418058	49.2469	186.271	TP53
regulation of T-helper 17 cell differentiation (GO:2000319)	0.0418058	49.2469	186.271	IL4
regulation of tau-protein kinase activity (GO:1902947)	0.0418058	49.2469	186.271	IFNG
regulation of type B pancreatic cell development (GO:2000074)	0.0418058	49.2469	186.271	AKT1
renal filtration (GO:0097205)	0.0418058	49.2469	186.271	CD34
hematopoietic stem cell differentiation (GO:0060218)	0.0418058	49.2469	186.271	TP53
lactation (GO:0007595)	0.0418058	49.2469	186.271	VEGFA
leptin-mediated signaling pathway (GO:0033210)	0.0418058	49.2469	186.271	STAT3
Wnt signaling pathway involved in midbrain dopaminergic neuron differentiation (GO:1904953)	0.0418058	49.2469	186.271	CTNNB1
myelin maintenance (GO:0043217)	0.0418058	49.2469	186.271	CXCR4
myeloid dendritic cell differentiation (GO:0043011)	0.0418058	49.2469	186.271	IL4
negative regulation of cell-cell adhesion mediated by cadherin (GO:2000048)	0.0418058	49.2469	186.271	VEGFA
negative regulation of heterotypic cell-cell adhesion (GO:0034115)	0.0418058	49.2469	186.271	IL10
negative regulation of lymphocyte apoptotic process (GO:0070229)	0.0418058	49.2469	186.271	IL2
negative regulation of receptor binding (GO:1900121)	0.0418058	49.2469	186.271	IL10
negative regulation of telomerase activity (GO:0051974)	0.0418058	49.2469	186.271	TP53
negative regulation of transmembrane transport (GO:0034763)	0.0418058	49.2469	186.271	AKT1
nerve growth factor signaling pathway (GO:0038180)	0.0418058	49.2469	186.271	BDNF
neuron projection maintenance (GO:1990535)	0.0418058	49.2469	186.271	INS
positive regulation by symbiont of entry into host (GO:0075294)	0.0418058	49.2469	186.271	CD4
positive regulation of mesenchymal cell proliferation (GO:0002053)	0.0418058	49.2469	186.271	MYC
positive regulation of monocyte differentiation (GO:0045657)	0.0418058	49.2469	186.271	CD4
positive regulation of myoblast fusion (GO:1901741)	0.0418058	49.2469	186.271	IL4
positive regulation of T cell apoptotic process (GO:0070234)	0.0418058	49.2469	186.271	TP53
positive regulation of tissue remodeling (GO:0034105)	0.0418058	49.2469	186.271	IL2
positive regulation of vascular endothelial growth factor receptor signaling pathway (GO:0030949)	0.0418058	49.2469	186.271	HIF1A
positive regulation of vasculogenesis (GO:2001214)	0.0418058	49.2469	186.271	CD34
positive regulation of viral entry into host cell (GO:0046598)	0.0418058	49.2469	186.271	CD4
cell junction assembly (GO:0034329)	0.0422629	9.02455	34.0261	BDNF;ACTB
cellular response to organonitrogen compound (GO:0071417)	0.0429412	8.93474	33.5252	CTNNB1;ACTB
chromatin remodeling (GO:0006338)	0.0429412	8.93474	33.5252	MYC;ACTB
regulation of insulin secretion (GO:0050796)	0.0436711	8.8467	33.0358	IFNG;TNF
regulation of JNK cascade (GO:0046328)	0.0440085	8.76037	32.5576	HRAS;EGFR
neutrophil degranulation (GO:0043312)	0.0440085	3.88879	14.4493	ITGAM;PTPRC;PECAM1;PTPN6
regulation of cell cycle process (GO:0010564)	0.0440085	8.6757	32.0902	CTNNB1;MKI67
chromosome organization (GO:0051276)	0.0440085	8.6757	32.0902	SOX2;MYC
protein localization to nucleus (GO:0034504)	0.0440085	8.6757	32.0902	STAT3;AKT1
neutrophil activation involved in immune response (GO:0002283)	0.0440085	3.85566	14.2236	ITGAM;PTPRC;PECAM1;PTPN6
axonal transport of mitochondrion (GO:0019896)	0.0440085	44.32	163.461	HIF1A
camera-type eye morphogenesis (GO:0048593)	0.0440085	44.32	163.461	VEGFA
cellular response to interleukin-2 (GO:0071352)	0.0440085	44.32	163.461	IL2
regulation of lymphocyte migration (GO:2000401)	0.0440085	44.32	163.461	AKT1
regulation of mesenchymal cell proliferation (GO:0010464)	0.0440085	44.32	163.461	MYC
DNA damage response, signal transduction resulting in transcription (GO:0042772)	0.0440085	44.32	163.461	TP53
fatty acid homeostasis (GO:0055089)	0.0440085	44.32	163.461	INS
regulation of T-helper 2 cell cytokine production (GO:2000551)	0.0440085	44.32	163.461	IL4
hematopoietic stem cell proliferation (GO:0071425)	0.0440085	44.32	163.461	CD34
induction of positive chemotaxis (GO:0050930)	0.0440085	44.32	163.461	VEGFA
inositol phosphate biosynthetic process (GO:0032958)	0.0440085	44.32	163.461	FGF2
insulin-like growth factor receptor signaling pathway (GO:0048009)	0.0440085	44.32	163.461	AKT1
interleukin-2-mediated signaling pathway (GO:0038110)	0.0440085	44.32	163.461	IL2
interleukin-35-mediated signaling pathway (GO:0070757)	0.0440085	44.32	163.461	STAT3
T cell homeostasis (GO:0043029)	0.0440085	44.32	163.461	AKT1
tetrahydrobiopterin metabolic process (GO:0046146)	0.0440085	44.32	163.461	AKT1
midbrain dopaminergic neuron differentiation (GO:1904948)	0.0440085	44.32	163.461	CTNNB1
monocyte differentiation (GO:0030224)	0.0440085	44.32	163.461	VEGFA
negative regulation of interleukin-17 production (GO:0032700)	0.0440085	44.32	163.461	IFNG
negative regulation of lymphocyte migration (GO:2000402)	0.0440085	44.32	163.461	AKT1
negative regulation of response to cytokine stimulus (GO:0060761)	0.0440085	44.32	163.461	PTPRC
negative regulation of T-helper cell differentiation (GO:0045623)	0.0440085	44.32	163.461	IL4
positive regulation of ceramide biosynthetic process (GO:2000304)	0.0440085	44.32	163.461	TNF
positive regulation of interleukin-13 production (GO:0032736)	0.0440085	44.32	163.461	IL4
positive regulation of nitric-oxide synthase biosynthetic process (GO:0051770)	0.0440085	44.32	163.461	IFNG
positive regulation of posttranscriptional gene silencing (GO:0060148)	0.0440085	44.32	163.461	STAT3
positive regulation of sphingolipid biosynthetic process (GO:0090154)	0.0440085	44.32	163.461	TNF
positive regulation of transcription from RNA polymerase II promoter in response to endoplasmic reticulum stress (GO:1990440)	0.0440085	44.32	163.461	TP53
positive regulation of transforming growth factor beta production (GO:0071636)	0.0440085	44.32	163.461	CD34
neutrophil mediated immunity (GO:0002446)	0.0448035	3.83117	14.0574	ITGAM;PTPRC;PECAM1;PTPN6
response to tumor necrosis factor (GO:0034612)	0.0465356	8.35269	30.3221	CASP3;AKT1
Fc-epsilon receptor signaling pathway (GO:0038095)	0.0466025	8.27565	29.9038	PIK3CA;PLCG1
regulation of actin filament depolymerization (GO:0030834)	0.0466025	40.2889	145.133	PIK3CA
cellular response to growth hormone stimulus (GO:0071378)	0.0466025	40.2889	145.133	STAT3
regulation of glycogen metabolic process (GO:0070873)	0.0466025	40.2889	145.133	AKT1
chromatin assembly or disassembly (GO:0006333)	0.0466025	40.2889	145.133	TP53
regulation of myoblast fusion (GO:1901739)	0.0466025	40.2889	145.133	IL4
regulation of oxidative stress-induced cell death (GO:1903201)	0.0466025	40.2889	145.133	FYN
regulation of sister chromatid cohesion (GO:0007063)	0.0466025	40.2889	145.133	CTNNB1
ganglion development (GO:0061548)	0.0466025	40.2889	145.133	CTNNB1
gas transport (GO:0015669)	0.0466025	40.2889	145.133	MYC
replicative senescence (GO:0090399)	0.0466025	40.2889	145.133	TP53
mesoderm morphogenesis (GO:0048332)	0.0466025	40.2889	145.133	EOMES
mitotic G1/S transition checkpoint signaling (GO:0044819)	0.0466025	40.2889	145.133	TP53
morphogenesis of a polarized epithelium (GO:0001738)	0.0466025	40.2889	145.133	ACTB
mRNA transcription (GO:0009299)	0.0466025	40.2889	145.133	TP53
negative regulation of B cell proliferation (GO:0030889)	0.0466025	40.2889	145.133	IL10
negative regulation of cell division (GO:0051782)	0.0466025	40.2889	145.133	MYC
negative regulation of hemostasis (GO:1900047)	0.0466025	40.2889	145.133	CD34
negative regulation of oxidoreductase activity (GO:0051354)	0.0466025	40.2889	145.133	INS
negative regulation of vascular permeability (GO:0043116)	0.0466025	40.2889	145.133	VEGFA
positive regulation of branching involved in ureteric bud morphogenesis (GO:0090190)	0.0466025	40.2889	145.133	VEGFA
positive regulation of myeloid leukocyte mediated immunity (GO:0002888)	0.0466025	40.2889	145.133	ITGAM
positive regulation of neuroinflammatory response (GO:0150078)	0.0466025	40.2889	145.133	TNF
positive regulation of protein depolymerization (GO:1901881)	0.0466025	40.2889	145.133	NES
positive regulation of vascular permeability (GO:0043117)	0.0466025	40.2889	145.133	VEGFA
Fc receptor signaling pathway (GO:0038093)	0.0468062	8.2	29.4946	PIK3CA;PLCG1
response to lipid (GO:0033993)	0.0483102	8.05276	28.7019	STAT3;CTNNB1
cellular response to lectin (GO:1990858)	0.0488472	7.98109	28.318	FYN;HRAS
stimulatory C-type lectin receptor signaling pathway (GO:0002223)	0.0488472	7.98109	28.318	FYN;HRAS
tumor necrosis factor-mediated signaling pathway (GO:0033209)	0.0488472	7.91069	27.942	TNF;TP53
pteridine-containing compound metabolic process (GO:0042558)	0.0488472	36.9296	130.117	AKT1
regulation of antigen receptor-mediated signaling pathway (GO:0050854)	0.0488472	36.9296	130.117	PTPRC
cardiac cell development (GO:0055006)	0.0488472	36.9296	130.117	VEGFA
regulation of chemokine (C-X-C motif) ligand 2 production (GO:2000341)	0.0488472	36.9296	130.117	TNF
cellular component maintenance (GO:0043954)	0.0488472	36.9296	130.117	FYN
regulation of leukocyte adhesion to vascular endothelial cell (GO:1904994)	0.0488472	36.9296	130.117	TNF
regulation of receptor signaling pathway via STAT (GO:1904892)	0.0488472	36.9296	130.117	PTPRC
regulation of response to stress (GO:0080134)	0.0488472	36.9296	130.117	IL10
relaxation of cardiac muscle (GO:0055119)	0.0488472	36.9296	130.117	PIK3CA
response to iron ion (GO:0010039)	0.0488472	36.9296	130.117	HIF1A
lymphocyte mediated immunity (GO:0002449)	0.0488472	36.9296	130.117	CD8A
macrophage activation involved in immune response (GO:0002281)	0.0488472	36.9296	130.117	IFNG
mitochondrion transport along microtubule (GO:0047497)	0.0488472	36.9296	130.117	HIF1A
negative regulation of gluconeogenesis (GO:0045721)	0.0488472	36.9296	130.117	INS
negative regulation of hydrogen peroxide-induced cell death (GO:1903206)	0.0488472	36.9296	130.117	IL10
negative regulation of macromolecule biosynthetic process (GO:0010558)	0.0488472	36.9296	130.117	IL10
negative regulation of mononuclear cell migration (GO:0071676)	0.0488472	36.9296	130.117	AKT1
negative regulation of myotube differentiation (GO:0010832)	0.0488472	36.9296	130.117	BDNF
positive regulation of calcineurin-mediated signaling (GO:0106058)	0.0488472	36.9296	130.117	TNF
positive regulation of calcineurin-NFAT signaling cascade (GO:0070886)	0.0488472	36.9296	130.117	TNF
positive regulation of cellular carbohydrate metabolic process (GO:0010676)	0.0488472	36.9296	130.117	AKT1
positive regulation of histone deacetylation (GO:0031065)	0.0488472	36.9296	130.117	VEGFA
positive regulation of protein localization to cell surface (GO:2000010)	0.0488472	36.9296	130.117	TNF
positive regulation of purine nucleotide biosynthetic process (GO:1900373)	0.0488472	36.9296	130.117	IL4
positive regulation of ruffle assembly (GO:1900029)	0.0488472	36.9296	130.117	HRAS
protein localization to mitochondrion (GO:0070585)	0.0488472	36.9296	130.117	AKT1
positive regulation of cell projection organization (GO:0031346)	0.0491408	7.8415	27.5737	BDNF;INS
innate immune response activating cell surface receptor signaling pathway (GO:0002220)	0.0505011	7.70668	26.8595	FYN;HRAS
cellular response to lipopolysaccharide (GO:0071222)	0.0505011	7.64099	26.5131	IL10;TNF
antigen processing and presentation of endogenous peptide antigen (GO:0002483)	0.0505011	34.0872	117.614	HLA-A
regulation of chromatin organization (GO:1902275)	0.0505011	34.0872	117.614	MKI67
regulation of fatty acid beta-oxidation (GO:0031998)	0.0505011	34.0872	117.614	AKT1
cellular response to low-density lipoprotein particle stimulus (GO:0071404)	0.0505011	34.0872	117.614	ITGB1
cGMP-mediated signaling (GO:0019934)	0.0505011	34.0872	117.614	INS
cytoplasmic sequestering of transcription factor (GO:0042994)	0.0505011	34.0872	117.614	IL10
detection of bacterium (GO:0016045)	0.0505011	34.0872	117.614	HLA-A
regulation of nitric-oxide synthase biosynthetic process (GO:0051769)	0.0505011	34.0872	117.614	IFNG
regulation of protein kinase C signaling (GO:0090036)	0.0505011	34.0872	117.614	VEGFA
regulation of response to interferon-gamma (GO:0060330)	0.0505011	34.0872	117.614	IFNG
genitalia development (GO:0048806)	0.0505011	34.0872	117.614	PTPN11
regulation of trophoblast cell migration (GO:1901163)	0.0505011	34.0872	117.614	VEGFA
regulation of vasculogenesis (GO:2001212)	0.0505011	34.0872	117.614	CD34
relaxation of muscle (GO:0090075)	0.0505011	34.0872	117.614	PIK3CA
growth hormone receptor signaling pathway via JAK-STAT (GO:0060397)	0.0505011	34.0872	117.614	STAT3
heart process (GO:0003015)	0.0505011	34.0872	117.614	FYN
substrate-dependent cell migration (GO:0006929)	0.0505011	34.0872	117.614	PTPRC
T cell differentiation in thymus (GO:0033077)	0.0505011	34.0872	117.614	PTPRC
T-helper cell differentiation (GO:0042093)	0.0505011	34.0872	117.614	IL4
vasodilation (GO:0042311)	0.0505011	34.0872	117.614	INS
myeloid dendritic cell activation (GO:0001773)	0.0505011	34.0872	117.614	IL4
negative regulation of cartilage development (GO:0061037)	0.0505011	34.0872	117.614	PTPN11
negative regulation of coagulation (GO:0050819)	0.0505011	34.0872	117.614	CD34
negative regulation of fibroblast growth factor receptor signaling pathway (GO:0040037)	0.0505011	34.0872	117.614	FGF2
negative regulation of interleukin-12 production (GO:0032695)	0.0505011	34.0872	117.614	IL10
negative regulation of pri-miRNA transcription by RNA polymerase II (GO:1902894)	0.0505011	34.0872	117.614	POU5F1
negative regulation of T cell mediated immunity (GO:0002710)	0.0505011	34.0872	117.614	PTPRC
ovarian follicle development (GO:0001541)	0.0505011	34.0872	117.614	VEGFA
positive regulation of brown fat cell differentiation (GO:0090336)	0.0505011	34.0872	117.614	INS
positive regulation of cardiac muscle cell proliferation (GO:0060045)	0.0505011	34.0872	117.614	FGF2
positive regulation of glucose metabolic process (GO:0010907)	0.0505011	34.0872	117.614	AKT1
positive regulation of long-term synaptic potentiation (GO:1900273)	0.0505011	34.0872	117.614	INS
positive regulation of protein deacetylation (GO:0090312)	0.0505011	34.0872	117.614	IFNG
positive regulation of protein-containing complex disassembly (GO:0043243)	0.0505011	34.0872	117.614	TNF
positive regulation of superoxide anion generation (GO:0032930)	0.0505011	34.0872	117.614	ITGAM
positive regulation of T cell receptor signaling pathway (GO:0050862)	0.0505011	34.0872	117.614	LCK
positive regulation of type 2 immune response (GO:0002830)	0.0505011	34.0872	117.614	IL4
epithelium development (GO:0060429)	0.0510023	7.51288	25.8409	CD34;VEGFA
innate immune response (GO:0045087)	0.0510023	4.58622	15.7701	IL4;LCK;FYN
platelet degranulation (GO:0002576)	0.0527145	7.32853	24.881	PECAM1;VEGFA
acute-phase response (GO:0006953)	0.0527145	31.6508	107.06	INS
regulation of branching involved in ureteric bud morphogenesis (GO:0090189)	0.0527145	31.6508	107.06	VEGFA
regulation of endothelial cell chemotaxis (GO:2001026)	0.0527145	31.6508	107.06	FGF2
contractile actin filament bundle assembly (GO:0030038)	0.0527145	31.6508	107.06	ITGB1
regulation of microglial cell activation (GO:1903978)	0.0527145	31.6508	107.06	PTPRC
endoderm development (GO:0007492)	0.0527145	31.6508	107.06	EOMES
eye photoreceptor cell development (GO:0042462)	0.0527145	31.6508	107.06	VEGFA
regulation of superoxide anion generation (GO:0032928)	0.0527145	31.6508	107.06	ITGAM
interleukin-27-mediated signaling pathway (GO:0070106)	0.0527145	31.6508	107.06	STAT3
stress fiber assembly (GO:0043149)	0.0527145	31.6508	107.06	ITGB1
mammary gland epithelium development (GO:0061180)	0.0527145	31.6508	107.06	AKT1
negative regulation of chondrocyte differentiation (GO:0032331)	0.0527145	31.6508	107.06	PTPN11
negative regulation of leukocyte activation (GO:0002695)	0.0527145	31.6508	107.06	IL4
negative regulation of leukocyte mediated cytotoxicity (GO:0001911)	0.0527145	31.6508	107.06	PTPRC
nitric oxide biosynthetic process (GO:0006809)	0.0527145	31.6508	107.06	AKT1
peptidyl-tyrosine autophosphorylation (GO:0038083)	0.0527145	31.6508	107.06	EGFR
photoreceptor cell development (GO:0042461)	0.0527145	31.6508	107.06	VEGFA
positive regulation of acute inflammatory response (GO:0002675)	0.0527145	31.6508	107.06	TNF
positive regulation of cell killing (GO:0031343)	0.0527145	31.6508	107.06	IFNG
positive regulation of exosomal secretion (GO:1903543)	0.0527145	31.6508	107.06	IFNG
positive regulation of histone H3-K4 methylation (GO:0051571)	0.0527145	31.6508	107.06	CTNNB1
positive regulation of protein export from nucleus (GO:0046827)	0.0527145	31.6508	107.06	TP53
protein localization to cell-cell junction (GO:0150105)	0.0527145	31.6508	107.06	ACTB
circulatory system development (GO:0072359)	0.0527202	7.26906	24.5732	PIK3CA;PTPN11
phosphatidylinositol biosynthetic process (GO:0006661)	0.0527202	7.26906	24.5732	PIK3CA;FGF2
cellular response to insulin stimulus (GO:0032869)	0.0547124	7.09628	23.6845	AKT1;INS
apoptotic DNA fragmentation (GO:0006309)	0.0547124	29.5393	98.044	CASP3
regulation of ATP biosynthetic process (GO:2001169)	0.0547124	29.5393	98.044	IL4
body fluid secretion (GO:0007589)	0.0547124	29.5393	98.044	VEGFA
regulation of ceramide biosynthetic process (GO:2000303)	0.0547124	29.5393	98.044	TNF
regulation of interleukin-1 production (GO:0032652)	0.0547124	29.5393	98.044	IL10
regulation of interleukin-13 production (GO:0032656)	0.0547124	29.5393	98.044	IL4
regulation of leukocyte activation (GO:0002694)	0.0547124	29.5393	98.044	LCK
regulation of mast cell degranulation (GO:0043304)	0.0547124	29.5393	98.044	IL4
dendritic cell chemotaxis (GO:0002407)	0.0547124	29.5393	98.044	CXCR4
regulation of phosphate metabolic process (GO:0019220)	0.0547124	29.5393	98.044	IL4
killing by host of symbiont cells (GO:0051873)	0.0547124	29.5393	98.044	GAPDH
sympathetic nervous system development (GO:0048485)	0.0547124	29.5393	98.044	CTNNB1
negative regulation of epithelial cell differentiation (GO:0030857)	0.0547124	29.5393	98.044	IFNG
negative regulation of immune effector process (GO:0002698)	0.0547124	29.5393	98.044	INS
negative regulation of natural killer cell mediated cytotoxicity (GO:0045953)	0.0547124	29.5393	98.044	HLA-A
negative regulation of release of cytochrome c from mitochondria (GO:0090201)	0.0547124	29.5393	98.044	AKT1
neuron projection organization (GO:0106027)	0.0547124	29.5393	98.044	INS
nitric oxide metabolic process (GO:0046209)	0.0547124	29.5393	98.044	AKT1
polyol biosynthetic process (GO:0046173)	0.0547124	29.5393	98.044	FGF2
positive regulation of alpha-beta T cell proliferation (GO:0046641)	0.0547124	29.5393	98.044	HLA-A
positive regulation of endothelial cell apoptotic process (GO:2000353)	0.0547124	29.5393	98.044	PLCG1
positive regulation of isotype switching (GO:0045830)	0.0547124	29.5393	98.044	IL4
positive regulation of leukocyte adhesion to vascular endothelial cell (GO:1904996)	0.0547124	29.5393	98.044	TNF
positive regulation of small molecule metabolic process (GO:0062013)	0.0547124	29.5393	98.044	AKT1
positive regulation of syncytium formation by plasma membrane fusion (GO:0060143)	0.0547124	29.5393	98.044	IL4
cellular response to metal ion (GO:0071248)	0.0551849	6.98555	23.1193	AKT1;EGFR
regulation of cell killing (GO:0031341)	0.0573775	27.6917	90.2638	IL10
regulation of leukocyte migration (GO:0002685)	0.0573775	27.6917	90.2638	VEGFA
regulation of metal ion transport (GO:0010959)	0.0573775	27.6917	90.2638	CD4
stem cell development (GO:0048864)	0.0573775	27.6917	90.2638	PTPRC
vasculature development (GO:0001944)	0.0573775	27.6917	90.2638	PIK3CA
negative regulation of ATPase activity (GO:0032780)	0.0573775	27.6917	90.2638	TP53
negative regulation of chemokine production (GO:0032682)	0.0573775	27.6917	90.2638	IL10
negative regulation of fatty acid metabolic process (GO:0045922)	0.0573775	27.6917	90.2638	INS
negative regulation of vascular associated smooth muscle cell proliferation (GO:1904706)	0.0573775	27.6917	90.2638	IL10
positive regulation of cardiac muscle tissue growth (GO:0055023)	0.0573775	27.6917	90.2638	FGF2
positive regulation of DNA replication (GO:0045740)	0.0573775	27.6917	90.2638	EGFR
positive regulation of positive chemotaxis (GO:0050927)	0.0573775	27.6917	90.2638	VEGFA
regulation of brown fat cell differentiation (GO:0090335)	0.0594895	26.0614	83.4895	INS
regulation of catabolic process (GO:0009894)	0.0594895	26.0614	83.4895	ITGB1
regulation of chromosome segregation (GO:0051983)	0.0594895	26.0614	83.4895	MKI67
cellular response to alkaloid (GO:0071312)	0.0594895	26.0614	83.4895	CASP3
regulation of fatty acid metabolic process (GO:0019217)	0.0594895	26.0614	83.4895	INS
dendritic cell migration (GO:0036336)	0.0594895	26.0614	83.4895	CXCR4
endothelial cell proliferation (GO:0001935)	0.0594895	26.0614	83.4895	CD34
regulation of protein sumoylation (GO:0033233)	0.0594895	26.0614	83.4895	CTNNB1
regulation of protein-containing complex disassembly (GO:0043244)	0.0594895	26.0614	83.4895	TNF
regulation of transcription by RNA polymerase I (GO:0006356)	0.0594895	26.0614	83.4895	ERBB2
hyaluronan catabolic process (GO:0030214)	0.0594895	26.0614	83.4895	FGF2
intermediate filament organization (GO:0045109)	0.0594895	26.0614	83.4895	GFAP
negative regulation of biosynthetic process (GO:0009890)	0.0594895	26.0614	83.4895	INS
negative regulation of interleukin-8 production (GO:0032717)	0.0594895	26.0614	83.4895	IL10
negative regulation of leukocyte cell-cell adhesion (GO:1903038)	0.0594895	26.0614	83.4895	AKT1
nitric oxide mediated signal transduction (GO:0007263)	0.0594895	26.0614	83.4895	INS
positive chemotaxis (GO:0050918)	0.0594895	26.0614	83.4895	VEGFA
positive regulation of CREB transcription factor activity (GO:0032793)	0.0594895	26.0614	83.4895	VEGFA
positive regulation of glial cell differentiation (GO:0045687)	0.0594895	26.0614	83.4895	CXCR4
positive regulation of interleukin-4 production (GO:0032753)	0.0594895	26.0614	83.4895	CD28
positive regulation of peptidyl-serine phosphorylation of STAT protein (GO:0033141)	0.0594895	26.0614	83.4895	IFNG
positive regulation of phosphoprotein phosphatase activity (GO:0032516)	0.0594895	26.0614	83.4895	PTPRC
chromatin organization (GO:0006325)	0.0612974	6.43312	20.3515	SOX2;MYC
receptor-mediated endocytosis (GO:0006898)	0.0612974	6.38717	20.1253	ITGB1;ITGAM
regulation of bicellular tight junction assembly (GO:2000810)	0.0612974	24.6123	77.544	TNF
regulation of cell-cell adhesion mediated by cadherin (GO:2000047)	0.0612974	24.6123	77.544	VEGFA
cardiac muscle cell contraction (GO:0086003)	0.0612974	24.6123	77.544	PIK3CA
regulation of epithelial cell differentiation (GO:0030856)	0.0612974	24.6123	77.544	IFNG
regulation of exosomal secretion (GO:1903541)	0.0612974	24.6123	77.544	IFNG
cellular response to interleukin-7 (GO:0098761)	0.0612974	24.6123	77.544	STAT3
regulation of histone H3-K4 methylation (GO:0051569)	0.0612974	24.6123	77.544	CTNNB1
detection of mechanical stimulus (GO:0050982)	0.0612974	24.6123	77.544	CTNNB1
diol metabolic process (GO:0034311)	0.0612974	24.6123	77.544	AKT1
regulation of oligodendrocyte differentiation (GO:0048713)	0.0612974	24.6123	77.544	CXCR4
regulation of peptidyl-serine phosphorylation of STAT protein (GO:0033139)	0.0612974	24.6123	77.544	IFNG
excitatory postsynaptic potential (GO:0060079)	0.0612974	24.6123	77.544	AKT1
regulation of stem cell population maintenance (GO:2000036)	0.0612974	24.6123	77.544	MYC
regulation of T cell cytokine production (GO:0002724)	0.0612974	24.6123	77.544	HLA-A
interleukin-7-mediated signaling pathway (GO:0038111)	0.0612974	24.6123	77.544	STAT3
maintenance of protein localization in organelle (GO:0072595)	0.0612974	24.6123	77.544	AKT1
myeloid cell activation involved in immune response (GO:0002275)	0.0612974	24.6123	77.544	IFNG
negative regulation of nervous system development (GO:0051961)	0.0612974	24.6123	77.544	TNF
negative regulation of RNA metabolic process (GO:0051253)	0.0612974	24.6123	77.544	TNF
negative regulation of striated muscle cell differentiation (GO:0051154)	0.0612974	24.6123	77.544	BDNF
positive regulation of actin cytoskeleton reorganization (GO:2000251)	0.0612974	24.6123	77.544	HRAS
positive regulation of establishment of protein localization (GO:1904951)	0.0612974	24.6123	77.544	TNF
positive regulation of focal adhesion assembly (GO:0051894)	0.0612974	24.6123	77.544	VEGFA
positive regulation of oxidoreductase activity (GO:0051353)	0.0612974	24.6123	77.544	TNF
negative regulation of cell migration (GO:0030336)	0.0619996	6.34187	19.903	IL4;FGF2
protein-DNA complex disassembly (GO:0032986)	0.0632887	23.3158	72.2892	MYC
regulation of fibroblast growth factor receptor signaling pathway (GO:0040036)	0.0632887	23.3158	72.2892	FGF2
cortical actin cytoskeleton organization (GO:0030866)	0.0632887	23.3158	72.2892	TNF
regulation of nuclear division (GO:0051783)	0.0632887	23.3158	72.2892	MKI67
embryonic digestive tract development (GO:0048566)	0.0632887	23.3158	72.2892	TNF
energy reserve metabolic process (GO:0006112)	0.0632887	23.3158	72.2892	MYC
regulation of protein modification by small protein conjugation or removal (GO:1903320)	0.0632887	23.3158	72.2892	HIF1A
regulation of tissue remodeling (GO:0034103)	0.0632887	23.3158	72.2892	IL2
gastrulation (GO:0007369)	0.0632887	23.3158	72.2892	EOMES
growth hormone receptor signaling pathway (GO:0060396)	0.0632887	23.3158	72.2892	STAT3
lipopolysaccharide-mediated signaling pathway (GO:0031663)	0.0632887	23.3158	72.2892	TNF
toll-like receptor 4 signaling pathway (GO:0034142)	0.0632887	23.3158	72.2892	ITGAM
mesoderm development (GO:0007498)	0.0632887	23.3158	72.2892	VEGFA
negative regulation of lipid storage (GO:0010888)	0.0632887	23.3158	72.2892	TNF
negative regulation of osteoclast differentiation (GO:0045671)	0.0632887	23.3158	72.2892	IL4
positive regulation of activated T cell proliferation (GO:0042104)	0.0632887	23.3158	72.2892	IL2
positive regulation of alpha-beta T cell activation (GO:0046635)	0.0632887	23.3158	72.2892	HLA-A
positive regulation of epithelial cell differentiation (GO:0030858)	0.0632887	23.3158	72.2892	FGF2
positive regulation of hormone secretion (GO:0046887)	0.0632887	23.3158	72.2892	INS
positive regulation of lymphocyte differentiation (GO:0045621)	0.0632887	23.3158	72.2892	IL4
beta-catenin destruction complex disassembly (GO:1904886)	0.0657574	22.1489	67.6154	CTNNB1
regulation of cardiac muscle cell proliferation (GO:0060043)	0.0657574	22.1489	67.6154	FGF2
calcium-mediated signaling using intracellular calcium source (GO:0035584)	0.0657574	22.1489	67.6154	PTPRC
cellular response to estradiol stimulus (GO:0071392)	0.0657574	22.1489	67.6154	EGFR
innate immune response in mucosa (GO:0002227)	0.0657574	22.1489	67.6154	IL4
intrinsic apoptotic signaling pathway in response to DNA damage by p53 class mediator (GO:0042771)	0.0657574	22.1489	67.6154	TP53
negative regulation of response to wounding (GO:1903035)	0.0657574	22.1489	67.6154	FGF2
neuron apoptotic process (GO:0051402)	0.0657574	22.1489	67.6154	GAPDH
positive regulation of immune system process (GO:0002684)	0.0657574	22.1489	67.6154	VEGFA
positive regulation of phosphatase activity (GO:0010922)	0.0657574	22.1489	67.6154	IFNG
positive regulation of transcription regulatory region DNA binding (GO:2000679)	0.0657574	22.1489	67.6154	IFNG
dephosphorylation (GO:0016311)	0.067241	5.96117	18.06	PTPRC;PTPN6
regulation of chromosome organization (GO:0033044)	0.0682311	21.0931	63.4348	MYC
regulation of execution phase of apoptosis (GO:1900117)	0.0682311	21.0931	63.4348	TP53
regulation of lipid storage (GO:0010883)	0.0682311	21.0931	63.4348	TNF
female gonad development (GO:0008585)	0.0682311	21.0931	63.4348	VEGFA
negative regulation of B cell activation (GO:0050869)	0.0682311	21.0931	63.4348	IL10
negative regulation of phosphate metabolic process (GO:0045936)	0.0682311	21.0931	63.4348	TP53
negative regulation of small molecule metabolic process (GO:0062014)	0.0682311	21.0931	63.4348	INS
positive regulation of axon extension (GO:0045773)	0.0682311	21.0931	63.4348	VEGFA
positive regulation of granulocyte chemotaxis (GO:0071624)	0.0682311	21.0931	63.4348	IL4
regulation of signal transduction by p53 class mediator (GO:1901796)	0.0690256	5.84416	17.5029	AKT1;TP53
artery development (GO:0060840)	0.0700702	20.1333	59.6759	VEGFA
regulation of calcium ion transmembrane transport (GO:1903169)	0.0700702	20.1333	59.6759	FYN
regulation of interferon-gamma-mediated signaling pathway (GO:0060334)	0.0700702	20.1333	59.6759	IFNG
regulation of interleukin-4 production (GO:0032673)	0.0700702	20.1333	59.6759	CD28
regulation of neural precursor cell proliferation (GO:2000177)	0.0700702	20.1333	59.6759	NES
DNA catabolic process, endonucleolytic (GO:0000737)	0.0700702	20.1333	59.6759	CASP3
regulation of protein export from nucleus (GO:0046825)	0.0700702	20.1333	59.6759	TP53
ERK1 and ERK2 cascade (GO:0070371)	0.0700702	20.1333	59.6759	MYC
regulation of supramolecular fiber organization (GO:1902903)	0.0700702	20.1333	59.6759	PIK3CA
hyaluronan metabolic process (GO:0030212)	0.0700702	20.1333	59.6759	FGF2
negative regulation of GTPase activity (GO:0034260)	0.0700702	20.1333	59.6759	HRAS
negative regulation of phosphoprotein phosphatase activity (GO:0032515)	0.0700702	20.1333	59.6759	TNF
negative regulation of reactive oxygen species metabolic process (GO:2000378)	0.0700702	20.1333	59.6759	INS
positive regulation of epithelial cell apoptotic process (GO:1904037)	0.0700702	20.1333	59.6759	PLCG1
positive regulation of interleukin-17 production (GO:0032740)	0.0700702	20.1333	59.6759	IL2
positive regulation of JUN kinase activity (GO:0043507)	0.0700702	20.1333	59.6759	TNF
positive regulation of receptor internalization (GO:0002092)	0.0700702	20.1333	59.6759	VEGFA
positive regulation of transcription by RNA polymerase I (GO:0045943)	0.0700702	20.1333	59.6759	ERBB2
positive regulation of transcription initiation from RNA polymerase II promoter (GO:0060261)	0.0700702	20.1333	59.6759	TP53
apoptotic nuclear changes (GO:0030262)	0.0717256	19.257	56.2803	CASP3
regulation of axon extension involved in axon guidance (GO:0048841)	0.0717256	19.257	56.2803	VEGFA
canonical glycolysis (GO:0061621)	0.0717256	19.257	56.2803	GAPDH
regulation of cellular response to transforming growth factor beta stimulus (GO:1903844)	0.0717256	19.257	56.2803	IL4
cardiac muscle cell development (GO:0055013)	0.0717256	19.257	56.2803	VEGFA
cardiac muscle cell differentiation (GO:0055007)	0.0717256	19.257	56.2803	VEGFA
defense response to fungus (GO:0050832)	0.0717256	19.257	56.2803	GAPDH
dendritic cell differentiation (GO:0097028)	0.0717256	19.257	56.2803	IL4
DNA packaging (GO:0006323)	0.0717256	19.257	56.2803	TP53
endocrine system development (GO:0035270)	0.0717256	19.257	56.2803	SOX2
establishment of mitotic spindle orientation (GO:0000132)	0.0717256	19.257	56.2803	ITGB1
regulation of ruffle assembly (GO:1900027)	0.0717256	19.257	56.2803	HRAS
glucose catabolic process to pyruvate (GO:0061718)	0.0717256	19.257	56.2803	GAPDH
regulation of vascular endothelial growth factor receptor signaling pathway (GO:0030947)	0.0717256	19.257	56.2803	HIF1A
mammary gland development (GO:0030879)	0.0717256	19.257	56.2803	VEGFA
negative regulation of neuron differentiation (GO:0045665)	0.0717256	19.257	56.2803	SOX2
negative regulation of protein depolymerization (GO:1901880)	0.0717256	19.257	56.2803	PIK3CA
negative regulation of protein tyrosine kinase activity (GO:0061099)	0.0717256	19.257	56.2803	PTPRC
positive regulation of cell-substrate junction organization (GO:0150117)	0.0717256	19.257	56.2803	VEGFA
positive regulation of lamellipodium assembly (GO:0010592)	0.0717256	19.257	56.2803	PIK3CA
positive regulation of p38MAPK cascade (GO:1900745)	0.0717256	19.257	56.2803	VEGFA
positive regulation of viral life cycle (GO:1903902)	0.0717256	19.257	56.2803	CD4
heart development (GO:0007507)	0.0728609	5.55331	16.1383	PTPN11;VEGFA
regulation of neuron projection development (GO:0010975)	0.0735895	5.51896	15.9791	BDNF;AKT1
regulation of interferon-alpha production (GO:0032647)	0.0737888	18.4537	53.1999	IL10
chemical synaptic transmission, postsynaptic (GO:0099565)	0.0737888	18.4537	53.1999	AKT1
regulation of myotube differentiation (GO:0010830)	0.0737888	18.4537	53.1999	BDNF
energy derivation by oxidation of organic compounds (GO:0015980)	0.0737888	18.4537	53.1999	MYC
glycolytic process through glucose-6-phosphate (GO:0061620)	0.0737888	18.4537	53.1999	GAPDH
in utero embryonic development (GO:0001701)	0.0737888	18.4537	53.1999	VEGFA
negative regulation of cell junction assembly (GO:1901889)	0.0737888	18.4537	53.1999	TNF
negative regulation of cellular carbohydrate metabolic process (GO:0010677)	0.0737888	18.4537	53.1999	INS
peripheral nervous system development (GO:0007422)	0.0737888	18.4537	53.1999	BDNF
positive regulation of ERBB signaling pathway (GO:1901186)	0.0737888	18.4537	53.1999	AKT1
positive regulation of release of cytochrome c from mitochondria (GO:0090200)	0.0737888	18.4537	53.1999	TP53
positive regulation of vascular endothelial growth factor production (GO:0010575)	0.0737888	18.4537	53.1999	HIF1A
regulation of chondrocyte differentiation (GO:0032330)	0.0757393	17.7147	50.3943	PTPN11
regulation of potassium ion transmembrane transporter activity (GO:1901016)	0.0757393	17.7147	50.3943	ITGB1
regulation of protein insertion into mitochondrial membrane involved in apoptotic signaling pathway (GO:1900739)	0.0757393	17.7147	50.3943	TP53
endothelial cell development (GO:0001885)	0.0757393	17.7147	50.3943	PECAM1
regulation of synapse organization (GO:0050807)	0.0757393	17.7147	50.3943	TNF
regulation of telomere maintenance (GO:0032204)	0.0757393	17.7147	50.3943	MYC
hippo signaling (GO:0035329)	0.0757393	17.7147	50.3943	CASP3
lamellipodium assembly (GO:0030032)	0.0757393	17.7147	50.3943	ITGB1
TOR signaling (GO:0031929)	0.0757393	17.7147	50.3943	AKT1
negative regulation of cell development (GO:0010721)	0.0757393	17.7147	50.3943	TNF
negative regulation of protein transport (GO:0051224)	0.0757393	17.7147	50.3943	INS
negative regulation of signaling receptor activity (GO:2000272)	0.0757393	17.7147	50.3943	TNF
positive regulation of histone methylation (GO:0031062)	0.0757393	17.7147	50.3943	CTNNB1
positive regulation of protein insertion into mitochondrial membrane involved in apoptotic signaling pathway (GO:1900740)	0.0757393	17.7147	50.3943	TP53
positive regulation of T cell mediated cytotoxicity (GO:0001916)	0.0757393	17.7147	50.3943	HLA-A
acute inflammatory response (GO:0002526)	0.0780057	17.0325	47.8299	INS
regulation of blood coagulation (GO:0030193)	0.0780057	17.0325	47.8299	CD34
cellular senescence (GO:0090398)	0.0780057	17.0325	47.8299	HRAS
dendritic spine organization (GO:0097061)	0.0780057	17.0325	47.8299	FYN
entrainment of circadian clock by photoperiod (GO:0043153)	0.0780057	17.0325	47.8299	TP53
regulation of vascular endothelial growth factor production (GO:0010574)	0.0780057	17.0325	47.8299	HIF1A
positive regulation of calcium ion transmembrane transport (GO:1904427)	0.0780057	17.0325	47.8299	PLCG1
positive regulation of cellular component movement (GO:0051272)	0.0780057	17.0325	47.8299	VEGFA
positive regulation of muscle cell differentiation (GO:0051149)	0.0780057	17.0325	47.8299	CTNNB1
regulation of calcineurin-NFAT signaling cascade (GO:0070884)	0.0799201	16.4008	45.4779	TNF
cellular response to acid chemical (GO:0071229)	0.0799201	16.4008	45.4779	VEGFA
cellular zinc ion homeostasis (GO:0006882)	0.0799201	16.4008	45.4779	LCK
regulation of plasma membrane bounded cell projection organization (GO:0120035)	0.0799201	16.4008	45.4779	AKT1
regulation of reactive oxygen species biosynthetic process (GO:1903426)	0.0799201	16.4008	45.4779	INS
mucosal immune response (GO:0002385)	0.0799201	16.4008	45.4779	IL4
photoperiodism (GO:0009648)	0.0799201	16.4008	45.4779	TP53
positive regulation of cell communication (GO:0010647)	0.0799201	16.4008	45.4779	TNF
positive regulation of defense response to virus by host (GO:0002230)	0.0799201	16.4008	45.4779	IL4
positive regulation of fibroblast proliferation (GO:0048146)	0.0799201	16.4008	45.4779	MYC
positive regulation of phosphatidylinositol 3-kinase activity (GO:0043552)	0.0799201	16.4008	45.4779	FGF2
positive regulation of protein import into nucleus (GO:0042307)	0.0799201	16.4008	45.4779	IFNG
positive regulation of synapse assembly (GO:0051965)	0.0799201	16.4008	45.4779	BDNF
protein localization to cell surface (GO:0034394)	0.0799201	16.4008	45.4779	CTNNB1
glycerophospholipid biosynthetic process (GO:0046474)	0.0799583	5.1374	14.2391	PIK3CA;FGF2
regulation of mitotic cell cycle (GO:0007346)	0.0806884	5.10795	14.107	IL10;MKI67
regulated exocytosis (GO:0045055)	0.0819771	5.05005	13.8484	PECAM1;VEGFA
regulation of gluconeogenesis (GO:0006111)	0.0819771	15.8143	43.3142	INS
establishment of endothelial barrier (GO:0061028)	0.0819771	15.8143	43.3142	PECAM1
establishment of mitotic spindle localization (GO:0040001)	0.0819771	15.8143	43.3142	ITGB1
glycolytic process (GO:0006096)	0.0819771	15.8143	43.3142	GAPDH
lamellipodium organization (GO:0097581)	0.0819771	15.8143	43.3142	ITGB1
negative regulation of transferase activity (GO:0051348)	0.0819771	15.8143	43.3142	TP53
positive regulation of extrinsic apoptotic signaling pathway (GO:2001238)	0.0819771	15.8143	43.3142	TNF
positive regulation of viral genome replication (GO:0045070)	0.0819771	15.8143	43.3142	CD28
artery morphogenesis (GO:0048844)	0.0837999	15.2682	41.3179	VEGFA
cell projection organization (GO:0030030)	0.0837999	15.2682	41.3179	ITGB1
regulation of long-term synaptic potentiation (GO:1900271)	0.0837999	15.2682	41.3179	INS
regulation of macrophage activation (GO:0043030)	0.0837999	15.2682	41.3179	IL4
establishment of spindle orientation (GO:0051294)	0.0837999	15.2682	41.3179	ITGB1
extrinsic apoptotic signaling pathway via death domain receptors (GO:0008625)	0.0837999	15.2682	41.3179	TNF
heterotypic cell-cell adhesion (GO:0034113)	0.0837999	15.2682	41.3179	ITGB1
zinc ion homeostasis (GO:0055069)	0.0837999	15.2682	41.3179	LCK
morphogenesis of an epithelium (GO:0002009)	0.0837999	15.2682	41.3179	ACTB
negative regulation of cytoskeleton organization (GO:0051494)	0.0837999	15.2682	41.3179	PIK3CA
negative regulation of interleukin-1 production (GO:0032692)	0.0837999	15.2682	41.3179	IL10
plasma membrane invagination (GO:0099024)	0.0837999	15.2682	41.3179	ITGAM
positive regulation of lipid kinase activity (GO:0090218)	0.0837999	15.2682	41.3179	FGF2
positive regulation of protein import (GO:1904591)	0.0837999	15.2682	41.3179	IFNG
cellular nitrogen compound biosynthetic process (GO:0044271)	0.0864305	14.7585	39.4712	AKT1
regulation of chemotaxis (GO:0050920)	0.0888469	14.2817	37.7585	CXCR4
regulation of NMDA receptor activity (GO:2000310)	0.0888469	14.2817	37.7585	IFNG
negative regulation of DNA biosynthetic process (GO:2000279)	0.0888469	14.2817	37.7585	TP53
positive regulation of lamellipodium organization (GO:1902745)	0.0888469	14.2817	37.7585	PIK3CA
antigen processing and presentation of peptide antigen via MHC class I (GO:0002474)	0.0910346	13.8347	36.1664	HLA-A
signal transduction by p53 class mediator (GO:0072331)	0.0910346	13.8347	36.1664	TP53
vasculogenesis (GO:0001570)	0.0910346	13.8347	36.1664	VEGFA
muscle cell development (GO:0055001)	0.0910346	13.8347	36.1664	VEGFA
neuron projection extension (GO:1990138)	0.0910346	13.8347	36.1664	CTNNB1
positive regulation of cytokine production involved in immune response (GO:0002720)	0.0910346	13.8347	36.1664	HLA-A
positive regulation of telomere maintenance via telomerase (GO:0032212)	0.0910346	13.8347	36.1664	CTNNB1
regulation of activated T cell proliferation (GO:0046006)	0.092633	13.4148	34.6831	IL2
regulation of cell adhesion mediated by integrin (GO:0033628)	0.092633	13.4148	34.6831	PTPN11
cardiac muscle contraction (GO:0060048)	0.092633	13.4148	34.6831	PIK3CA
cellular response to amino acid stimulus (GO:0071230)	0.092633	13.4148	34.6831	FYN
regulation of glucose metabolic process (GO:0010906)	0.092633	13.4148	34.6831	AKT1
central nervous system neuron differentiation (GO:0021953)	0.092633	13.4148	34.6831	CTNNB1
regulation of lamellipodium assembly (GO:0010591)	0.092633	13.4148	34.6831	PIK3CA
epithelial tube morphogenesis (GO:0060562)	0.092633	13.4148	34.6831	CTNNB1
negative regulation of mitochondrion organization (GO:0010823)	0.092633	13.4148	34.6831	AKT1
positive regulation of calcium ion transport into cytosol (GO:0010524)	0.092633	13.4148	34.6831	PLCG1
positive regulation of epidermal growth factor receptor signaling pathway (GO:0045742)	0.092633	13.4148	34.6831	AKT1
positive regulation of interleukin-12 production (GO:0032735)	0.092633	13.4148	34.6831	IFNG
positive regulation of mitochondrial outer membrane permeabilization involved in apoptotic signaling pathway (GO:1901030)	0.092633	13.4148	34.6831	TP53
positive regulation of release of sequestered calcium ion into cytosol (GO:0051281)	0.092633	13.4148	34.6831	PLCG1
protein insertion into membrane (GO:0051205)	0.092633	13.4148	34.6831	EGFR
regulation of signal transduction (GO:0009966)	0.0933702	4.5821	11.8069	FYN;NCAM1
blood vessel diameter maintenance (GO:0097746)	0.09419	13.0196	33.2984	INS
cellular response to amyloid-beta (GO:1904646)	0.09419	13.0196	33.2984	FYN
cellular response to virus (GO:0098586)	0.09419	13.0196	33.2984	HIF1A
regulation of JUN kinase activity (GO:0043506)	0.09419	13.0196	33.2984	TNF
regulation of muscle cell differentiation (GO:0051147)	0.09419	13.0196	33.2984	CTNNB1
regulation of phosphatidylinositol 3-kinase activity (GO:0043551)	0.09419	13.0196	33.2984	FGF2
regulation of postsynaptic membrane potential (GO:0060078)	0.09419	13.0196	33.2984	AKT1
regulation of T cell receptor signaling pathway (GO:0050856)	0.09419	13.0196	33.2984	LCK
regulation of trans-synaptic signaling (GO:0099177)	0.09419	13.0196	33.2984	BDNF
negative regulation of epithelial cell migration (GO:0010633)	0.09419	13.0196	33.2984	IL4
negative regulation of neurogenesis (GO:0050768)	0.09419	13.0196	33.2984	TNF
negative regulation of T cell proliferation (GO:0042130)	0.09419	13.0196	33.2984	IL10
positive regulation of lymphocyte activation (GO:0051251)	0.09419	13.0196	33.2984	LCK
positive regulation of reproductive process (GO:2000243)	0.09419	13.0196	33.2984	VEGFA
axonal transport (GO:0098930)	0.0955664	12.647	32.0032	HIF1A
regulation of cell cycle G1/S phase transition (GO:1902806)	0.0955664	12.647	32.0032	PTPN6
regulation of defense response to virus by host (GO:0050691)	0.0955664	12.647	32.0032	IL4
regulation of microtubule-based process (GO:0032886)	0.0955664	12.647	32.0032	ERBB2
regulation of ossification (GO:0030278)	0.0955664	12.647	32.0032	PTPN11
embryonic limb morphogenesis (GO:0030326)	0.0955664	12.647	32.0032	CTNNB1
endoderm formation (GO:0001706)	0.0955664	12.647	32.0032	EOMES
regulation of protein import into nucleus (GO:0042306)	0.0955664	12.647	32.0032	IFNG
regulation of receptor internalization (GO:0002090)	0.0955664	12.647	32.0032	VEGFA
retina homeostasis (GO:0001895)	0.0955664	12.647	32.0032	ACTB
intrinsic apoptotic signaling pathway by p53 class mediator (GO:0072332)	0.0955664	12.647	32.0032	TP53
Wnt signaling pathway, calcium modulating pathway (GO:0007223)	0.0955664	12.647	32.0032	CTNNB1
negative regulation of fat cell differentiation (GO:0045599)	0.0955664	12.647	32.0032	TNF
platelet aggregation (GO:0070527)	0.0955664	12.647	32.0032	ACTB
positive regulation of interferon-beta production (GO:0032728)	0.0955664	12.647	32.0032	PTPN11
positive regulation of T cell mediated immunity (GO:0002711)	0.0955664	12.647	32.0032	HLA-A
positive regulation of telomere maintenance via telomere lengthening (GO:1904358)	0.0955664	12.647	32.0032	CTNNB1
regulation of actin cytoskeleton reorganization (GO:2000249)	0.0976818	12.2951	30.7895	HRAS
regulation of p38MAPK cascade (GO:1900744)	0.0976818	12.2951	30.7895	VEGFA
regulation of transport (GO:0051049)	0.0976818	12.2951	30.7895	ACTB
negative regulation of stress-activated MAPK cascade (GO:0032873)	0.0976818	12.2951	30.7895	MYC
phagocytosis, engulfment (GO:0006911)	0.0976818	12.2951	30.7895	ITGAM
positive regulation of exocytosis (GO:0045921)	0.0976818	12.2951	30.7895	IFNG
mitotic cell cycle phase transition (GO:0044772)	0.0996038	4.33619	10.7711	MYC;NES
negative regulation of innate immune response (GO:0045824)	0.0999185	11.9622	29.6501	INS
positive regulation of cell development (GO:0010720)	0.0999185	11.9622	29.6501	IFNG
positive regulation of signaling (GO:0023056)	0.0999185	11.9622	29.6501	TNF
regulation of protein tyrosine kinase activity (GO:0061097)	0.101841	11.6468	28.5788	PTPRC
regulation of receptor-mediated endocytosis (GO:0048259)	0.101841	11.6468	28.5788	IL4
regulation of viral entry into host cell (GO:0046596)	0.101841	11.6468	28.5788	CD4
negative regulation of cellular metabolic process (GO:0031324)	0.101841	11.6468	28.5788	INS
negative regulation of lymphocyte proliferation (GO:0050672)	0.101841	11.6468	28.5788	IL10
negative regulation of protein secretion (GO:0050709)	0.101841	11.6468	28.5788	INS
negative regulation of secretion by cell (GO:1903531)	0.101841	11.6468	28.5788	INS
organophosphate biosynthetic process (GO:0090407)	0.101841	11.6468	28.5788	FGF2
digestive tract development (GO:0048565)	0.10396	11.3476	27.5699	TNF
negative regulation of blood coagulation (GO:0030195)	0.10396	11.3476	27.5699	CD34
negative regulation of protein kinase B signaling (GO:0051898)	0.10396	11.3476	27.5699	AKT1
positive regulation of cation channel activity (GO:2001259)	0.10396	11.3476	27.5699	IFNG
positive regulation of ossification (GO:0045778)	0.10396	11.3476	27.5699	PTPN11
carbohydrate catabolic process (GO:0016052)	0.105754	11.0633	26.6184	GAPDH
cortical cytoskeleton organization (GO:0030865)	0.105754	11.0633	26.6184	TNF
regulation of mitochondrial membrane potential (GO:0051881)	0.105754	11.0633	26.6184	AKT1
epithelial cell migration (GO:0010631)	0.105754	11.0633	26.6184	PIK3CA
regulation of response to DNA damage stimulus (GO:2001020)	0.105754	11.0633	26.6184	MYC
gluconeogenesis (GO:0006094)	0.105754	11.0633	26.6184	GAPDH
heart contraction (GO:0060047)	0.105754	11.0633	26.6184	PIK3CA
keratinocyte differentiation (GO:0030216)	0.105754	11.0633	26.6184	CASP3
positive regulation of TOR signaling (GO:0032008)	0.105754	11.0633	26.6184	PIK3CA
cellular response to lipid (GO:0071396)	0.105837	4.13427	9.94086	IL10;EGFR
ATP-dependent chromatin remodeling (GO:0043044)	0.107826	10.793	25.7198	ACTB
regulation of nervous system development (GO:0051960)	0.107826	10.793	25.7198	CTNNB1
phosphatidylinositol phosphate biosynthetic process (GO:0046854)	0.107826	10.793	25.7198	PIK3CA
positive regulation of epithelial to mesenchymal transition (GO:0010718)	0.107826	10.793	25.7198	CTNNB1
regulation of carbohydrate catabolic process (GO:0043470)	0.109489	10.5354	24.8699	HIF1A
cellular glucose homeostasis (GO:0001678)	0.109489	10.5354	24.8699	HIF1A
cellular response to glucose starvation (GO:0042149)	0.109489	10.5354	24.8699	TP53
regulation of purine nucleotide metabolic process (GO:1900542)	0.109489	10.5354	24.8699	HIF1A
heart looping (GO:0001947)	0.109489	10.5354	24.8699	EOMES
substantia nigra development (GO:0021762)	0.109489	10.5354	24.8699	ACTB
negative regulation of type I interferon production (GO:0032480)	0.109489	10.5354	24.8699	IL10
positive regulation of axonogenesis (GO:0050772)	0.109489	10.5354	24.8699	BDNF
positive regulation of peptide hormone secretion (GO:0090277)	0.109489	10.5354	24.8699	INS
positive regulation of T cell differentiation (GO:0045582)	0.109489	10.5354	24.8699	IL4
antibacterial humoral response (GO:0019731)	0.111358	10.2899	24.0652	HLA-A
response to amyloid-beta (GO:1904645)	0.111358	10.2899	24.0652	FYN
hexose biosynthetic process (GO:0019319)	0.111358	10.2899	24.0652	GAPDH
homotypic cell-cell adhesion (GO:0034109)	0.111358	10.2899	24.0652	ACTB
negative regulation of epidermal growth factor receptor signaling pathway (GO:0042059)	0.111358	10.2899	24.0652	EGFR
neurogenesis (GO:0022008)	0.111358	10.2899	24.0652	CXCR4
positive regulation of cell-matrix adhesion (GO:0001954)	0.111358	10.2899	24.0652	VEGFA
regulation of DNA repair (GO:0006282)	0.113443	10.0556	23.3023	EGFR
cellular response to radiation (GO:0071478)	0.113443	10.0556	23.3023	TP53
negative regulation of T cell activation (GO:0050868)	0.113443	10.0556	23.3023	IL10
positive regulation of Notch signaling pathway (GO:0045747)	0.113443	10.0556	23.3023	STAT3
regulation of DNA metabolic process (GO:0051052)	0.115429	9.8316	22.5781	MYC
regulation of synaptic transmission, glutamatergic (GO:0051966)	0.115429	9.8316	22.5781	TNF
vesicle organization (GO:0016050)	0.115429	9.8316	22.5781	CD34
positive regulation of organelle assembly (GO:1902117)	0.115429	9.8316	22.5781	TNF
positive regulation of response to stimulus (GO:0048584)	0.115429	9.8316	22.5781	MYC
determination of heart left/right asymmetry (GO:0061371)	0.117478	9.61739	21.89	EOMES
embryonic heart tube morphogenesis (GO:0003143)	0.117478	9.61739	21.89	EOMES
regulation of synapse assembly (GO:0051963)	0.117478	9.61739	21.89	BDNF
polyol metabolic process (GO:0019751)	0.117478	9.61739	21.89	PLCG1
cellular response to alcohol (GO:0097306)	0.119427	9.41229	21.2354	CTNNB1
establishment of protein localization to mitochondrion (GO:0072655)	0.119427	9.41229	21.2354	AKT1
myelination (GO:0042552)	0.119427	9.41229	21.2354	CXCR4
positive regulation of DNA repair (GO:0045739)	0.119427	9.41229	21.2354	EGFR
positive regulation of endocytosis (GO:0045807)	0.119427	9.41229	21.2354	IL4
receptor internalization (GO:0031623)	0.121273	9.21574	20.6122	ITGB1
cellular defense response (GO:0006968)	0.121273	9.21574	20.6122	ITGB1
regulation of interferon-beta production (GO:0032648)	0.121273	9.21574	20.6122	PTPN11
response to hydrogen peroxide (GO:0042542)	0.121273	9.21574	20.6122	FYN
secondary alcohol metabolic process (GO:1902652)	0.121273	9.21574	20.6122	IL4
negative regulation of cell projection organization (GO:0031345)	0.121273	9.21574	20.6122	FYN
regulation of generation of precursor metabolites and energy (GO:0043467)	0.123354	9.02721	20.0181	HIF1A
negative regulation of ERK1 and ERK2 cascade (GO:0070373)	0.123354	9.02721	20.0181	PTPRC
neuron migration (GO:0001764)	0.123354	9.02721	20.0181	VEGFA
regulation of cellular amine metabolic process (GO:0033238)	0.125249	8.84622	19.4514	INS
regulation of protein modification process (GO:0031399)	0.125249	8.84622	19.4514	IFNG
inositol lipid-mediated signaling (GO:0048017)	0.125249	8.84622	19.4514	PIK3CA
intrinsic apoptotic signaling pathway in response to DNA damage (GO:0008630)	0.125249	8.84622	19.4514	TP53
negative regulation of protein ubiquitination (GO:0031397)	0.125249	8.84622	19.4514	AKT1
ameboidal-type cell migration (GO:0001667)	0.126863	8.67233	18.9102	AKT1
cartilage development (GO:0051216)	0.126863	8.67233	18.9102	FGF2
regulation of release of sequestered calcium ion into cytosol (GO:0051279)	0.126863	8.67233	18.9102	PLCG1
regulation of telomere maintenance via telomerase (GO:0032210)	0.126863	8.67233	18.9102	CTNNB1
signal transduction in response to DNA damage (GO:0042770)	0.126863	8.67233	18.9102	TP53
myeloid cell differentiation (GO:0030099)	0.126863	8.67233	18.9102	CASP3
plasma membrane bounded cell projection morphogenesis (GO:0120039)	0.126863	8.67233	18.9102	BDNF
positive regulation of developmental growth (GO:0048639)	0.126863	8.67233	18.9102	BDNF
bicellular tight junction assembly (GO:0070830)	0.128806	8.50513	18.393	PECAM1
regulation of DNA replication (GO:0006275)	0.128806	8.50513	18.393	EGFR
heart morphogenesis (GO:0003007)	0.128806	8.50513	18.393	VEGFA
positive regulation of macroautophagy (GO:0016239)	0.128806	8.50513	18.393	IL4
regulation of cellular amino acid metabolic process (GO:0006521)	0.130555	8.34423	17.8983	INS
regulation of cyclin-dependent protein kinase activity (GO:1904029)	0.130555	8.34423	17.8983	ACTB
regulation of focal adhesion assembly (GO:0051893)	0.130555	8.34423	17.8983	VEGFA
striated muscle contraction (GO:0006941)	0.130555	8.34423	17.8983	PIK3CA
negative regulation of viral genome replication (GO:0045071)	0.130555	8.34423	17.8983	TNF
positive regulation of leukocyte chemotaxis (GO:0002690)	0.130555	8.34423	17.8983	VEGFA
pyruvate metabolic process (GO:0006090)	0.132555	8.1893	17.4248	GAPDH
glycoprotein metabolic process (GO:0009100)	0.132555	8.1893	17.4248	HIF1A
negative regulation of cytokine-mediated signaling pathway (GO:0001960)	0.132555	8.1893	17.4248	PTPRC
protein ubiquitination (GO:0016567)	0.133025	2.59717	5.51516	CTNNB1;HLA-A;HIF1A
cellular component assembly (GO:0022607)	0.133996	3.45648	7.30088	TP53;ACTB
regulation of ATP metabolic process (GO:1903578)	0.133996	8.04	16.9711	HIF1A
blood vessel morphogenesis (GO:0048514)	0.133996	8.04	16.9711	VEGFA
DNA damage response, signal transduction by p53 class mediator resulting in cell cycle arrest (GO:0006977)	0.133996	8.04	16.9711	TP53
glycosaminoglycan catabolic process (GO:0006027)	0.133996	8.04	16.9711	FGF2
sensory organ development (GO:0007423)	0.133996	8.04	16.9711	SOX2
tight junction assembly (GO:0120192)	0.133996	8.04	16.9711	PECAM1
positive regulation of establishment of protein localization to mitochondrion (GO:1903749)	0.133996	8.04	16.9711	TP53
regulation of reactive oxygen species metabolic process (GO:2000377)	0.13587	7.89603	16.5362	TP53
renal system development (GO:0072001)	0.13587	7.89603	16.5362	VEGFA
positive regulation of gene expression, epigenetic (GO:0045815)	0.13587	7.89603	16.5362	ACTB
positive regulation of interferon-gamma production (GO:0032729)	0.13587	7.89603	16.5362	HLA-A
receptor metabolic process (GO:0043112)	0.137361	7.75712	16.1189	ITGB1
cellular iron ion homeostasis (GO:0006879)	0.137361	7.75712	16.1189	MYC
chordate embryonic development (GO:0043009)	0.137361	7.75712	16.1189	VEGFA
eye development (GO:0001654)	0.137361	7.75712	16.1189	SOX2
regulation of tumor necrosis factor-mediated signaling pathway (GO:0010803)	0.137361	7.75712	16.1189	TNF
negative regulation of hydrolase activity (GO:0051346)	0.137361	7.75712	16.1189	HRAS
positive regulation of mitochondrion organization (GO:0010822)	0.137361	7.75712	16.1189	TP53
positive regulation of protein binding (GO:0032092)	0.137361	7.75712	16.1189	BDNF
regulation of secretion by cell (GO:1903530)	0.139388	7.62299	15.7183	INS
mitotic DNA damage checkpoint signaling (GO:0044773)	0.139388	7.62299	15.7183	TP53
apical junction assembly (GO:0043297)	0.14131	7.49341	15.3335	PECAM1
Notch signaling pathway (GO:0007219)	0.14131	7.49341	15.3335	MYC
peptidyl-threonine phosphorylation (GO:0018107)	0.14131	7.49341	15.3335	AKT1
iron ion homeostasis (GO:0055072)	0.143315	7.36815	14.9635	MYC
negative regulation of response to stimulus (GO:0048585)	0.143315	7.36815	14.9635	CD34
glucose metabolic process (GO:0006006)	0.145407	7.24699	14.6076	GAPDH
amyloid fibril formation (GO:1990000)	0.147295	7.12975	14.265	INS
cell cycle G1/S phase transition (GO:0044843)	0.147295	7.12975	14.265	MYC
positive regulation of viral process (GO:0048524)	0.147295	7.12975	14.265	CD28
antimicrobial humoral immune response mediated by antimicrobial peptide (GO:0061844)	0.149071	7.01623	13.9351	GAPDH
regulation of cellular ketone metabolic process (GO:0010565)	0.149071	7.01623	13.9351	INS
lipid homeostasis (GO:0055088)	0.149071	7.01623	13.9351	INS
plasma membrane organization (GO:0007009)	0.149071	7.01623	13.9351	CXCR4
cellular response to type I interferon (GO:0071357)	0.150933	6.90625	13.6172	HLA-A
type I interferon signaling pathway (GO:0060337)	0.150933	6.90625	13.6172	HLA-A
mitotic G1 DNA damage checkpoint signaling (GO:0031571)	0.150933	6.90625	13.6172	TP53
regulation of protein localization (GO:0032880)	0.152985	6.79966	13.3107	INS
peptidyl-threonine modification (GO:0018210)	0.154927	6.6963	13.0151	AKT1
positive regulation of catabolic process (GO:0009896)	0.154927	6.6963	13.0151	TNF
canonical Wnt signaling pathway (GO:0060070)	0.156963	6.59602	12.7297	CTNNB1
synapse assembly (GO:0007416)	0.158886	6.49869	12.4541	BDNF
positive regulation of protein transport (GO:0051222)	0.158886	6.49869	12.4541	TNF
defense response to Gram-positive bacterium (GO:0050830)	0.160482	6.40419	12.1879	HLA-A
establishment of protein localization to membrane (GO:0090150)	0.160482	6.40419	12.1879	EGFR
kidney development (GO:0001822)	0.160482	6.40419	12.1879	VEGFA
sterol metabolic process (GO:0016125)	0.160482	6.40419	12.1879	IL4
negative regulation of viral process (GO:0048525)	0.160482	6.40419	12.1879	TNF
regulation of TOR signaling (GO:0032006)	0.162275	6.31238	11.9306	PIK3CA
gland development (GO:0048732)	0.162275	6.31238	11.9306	SOX2
response to metal ion (GO:0010038)	0.162275	6.31238	11.9306	HIF1A
cell junction organization (GO:0034330)	0.164057	6.22316	11.6818	ACTB
negative regulation of epithelial cell proliferation (GO:0050680)	0.164057	6.22316	11.6818	SOX2
negative regulation of supramolecular fiber organization (GO:1902904)	0.164057	6.22316	11.6818	PIK3CA
antigen processing and presentation of exogenous peptide antigen via MHC class I, TAP-dependent (GO:0002479)	0.16561	6.13642	11.4411	HLA-A
chromatin assembly (GO:0031497)	0.16561	6.13642	11.4411	TP53
response to molecule of bacterial origin (GO:0002237)	0.16561	6.13642	11.4411	IL10
negative regulation of cell adhesion (GO:0007162)	0.16561	6.13642	11.4411	PTPRC
positive regulation of JNK cascade (GO:0046330)	0.16561	6.13642	11.4411	HRAS
DNA damage response, signal transduction by p53 class mediator (GO:0030330)	0.167476	6.05205	11.2081	TP53
NIK/NF-kappaB signaling (GO:0038061)	0.167476	6.05205	11.2081	AKT1
integrin-mediated signaling pathway (GO:0007229)	0.169443	5.96997	10.9825	ITGB1
actomyosin structure organization (GO:0031032)	0.171067	5.89007	10.7639	ITGB1
cell morphogenesis involved in neuron differentiation (GO:0048667)	0.171067	5.89007	10.7639	ACTB
regulation of epithelial to mesenchymal transition (GO:0010717)	0.171067	5.89007	10.7639	CTNNB1
cellular response to hormone stimulus (GO:0032870)	0.171067	5.89007	10.7639	STAT3
cholesterol metabolic process (GO:0008203)	0.172904	5.81228	10.5522	IL4
neutrophil migration (GO:1990266)	0.172904	5.81228	10.5522	PECAM1
antigen processing and presentation of exogenous peptide antigen via MHC class I (GO:0042590)	0.174617	5.73651	10.3469	HLA-A
negative regulation of blood vessel morphogenesis (GO:2000181)	0.174617	5.73651	10.3469	CTNNB1
negative regulation of protein serine/threonine kinase activity (GO:0071901)	0.174617	5.73651	10.3469	AKT1
axon development (GO:0061564)	0.176319	5.66268	10.1478	ACTB
regulation of cellular response to heat (GO:1900034)	0.176319	5.66268	10.1478	CD34
negative regulation of NF-kappaB transcription factor activity (GO:0032088)	0.176319	5.66268	10.1478	IL10
glycerophospholipid metabolic process (GO:0006650)	0.177895	5.59072	9.95461	PLCG1
response to interferon-gamma (GO:0034341)	0.177895	5.59072	9.95461	GAPDH
skin development (GO:0043588)	0.177895	5.59072	9.95461	CASP3
negative regulation of cell cycle (GO:0045786)	0.177895	5.59072	9.95461	IL10
regulation of gene expression, epigenetic (GO:0040029)	0.181826	5.45213	9.58515	ACTB
cellular protein localization (GO:0034613)	0.184363	2.72825	4.75685	CTNNB1;EGFR
response to insulin (GO:0032868)	0.185615	5.32021	9.23668	AKT1
regulation of cell cycle G2/M phase transition (GO:1902749)	0.187378	5.25661	9.0698	TP53
G1/S transition of mitotic cell cycle (GO:0000082)	0.187378	5.25661	9.0698	MYC
regulation of interferon-gamma production (GO:0032649)	0.189011	5.19451	8.90756	HLA-A
response to interleukin-1 (GO:0070555)	0.189011	5.19451	8.90756	HIF1A
negative regulation of cellular amide metabolic process (GO:0034249)	0.189011	5.19451	8.90756	GAPDH
intracellular protein transport (GO:0006886)	0.189586	2.67011	4.56889	STAT3;AKT1
sensory perception of mechanical stimulus (GO:0050954)	0.19249	5.07458	8.59634	BIRC5
metal ion transport (GO:0030001)	0.19249	5.07458	8.59634	FYN
positive regulation of neuron projection development (GO:0010976)	0.19249	5.07458	8.59634	BDNF
regulation of cation channel activity (GO:2001257)	0.194216	5.01667	8.44702	ITGB1
transforming growth factor beta receptor signaling pathway (GO:0007179)	0.194216	5.01667	8.44702	ITGB1
negative regulation of translation (GO:0017148)	0.196059	4.96005	8.30168	GAPDH
regulation of actin cytoskeleton organization (GO:0032956)	0.197642	4.90469	8.16019	PIK3CA
sensory perception of sound (GO:0007605)	0.197642	4.90469	8.16019	BIRC5
toll-like receptor signaling pathway (GO:0002224)	0.197642	4.90469	8.16019	ITGAM
Wnt signaling pathway (GO:0016055)	0.199469	4.85055	8.02239	CTNNB1
cellular response to DNA damage stimulus (GO:0006974)	0.200366	2.56087	4.22233	MYC;TP53
supramolecular fiber organization (GO:0097435)	0.201107	2.5534	4.19896	INS;GFAP
regulation of cell cycle phase transition (GO:1901987)	0.204779	4.69504	7.62988	TP53
mRNA metabolic process (GO:0016071)	0.204779	4.69504	7.62988	TP53
regulation of vesicle-mediated transport (GO:0060627)	0.206578	4.64538	7.5056	PTPRC
cellular response to chemical stress (GO:0062197)	0.216021	4.412	6.92852	PIK3CA
regulation of cell death (GO:0010941)	0.217646	4.3681	6.82129	FGF2
intrinsic apoptotic signaling pathway (GO:0097193)	0.217646	4.3681	6.82129	TP53
antigen processing and presentation of exogenous peptide antigen (GO:0002478)	0.219402	4.32505	6.71657	HLA-A
nucleotide-excision repair (GO:0006289)	0.223036	4.24145	6.51439	TP53
cellular response to peptide hormone stimulus (GO:0071375)	0.224773	4.20085	6.41676	AKT1
regulation of protein ubiquitination (GO:0031396)	0.230238	4.08354	6.13689	AKT1
response to endoplasmic reticulum stress (GO:0034976)	0.231952	4.04587	6.04772	TP53
cellular divalent inorganic cation homeostasis (GO:0072503)	0.233512	4.00889	5.9605	LCK
regulation of Wnt signaling pathway (GO:0030111)	0.233512	4.00889	5.9605	CTNNB1
protein-containing complex subunit organization (GO:0043933)	0.235212	3.97257	5.87518	TP53
cellular response to transforming growth factor beta stimulus (GO:0071560)	0.238744	3.90187	5.71	ITGB1
calcium ion transport (GO:0006816)	0.240275	3.86745	5.63003	FYN
cellular response to molecule of bacterial origin (GO:0071219)	0.240275	3.86745	5.63003	IL10
protein modification by small protein conjugation (GO:0032446)	0.249327	2.18305	3.09586	HLA-A;HIF1A
regulation of mRNA catabolic process (GO:0061013)	0.252662	3.64242	5.11477	AKT1
defense response to symbiont (GO:0140546)	0.255929	3.58284	4.98057	PTPRC
non-canonical Wnt signaling pathway (GO:0035567)	0.255929	3.58284	4.98057	CTNNB1
synapse organization (GO:0050808)	0.259009	3.52516	4.85158	BDNF
negative regulation of cell growth (GO:0030308)	0.259009	3.52516	4.85158	TP53
negative regulation of growth (GO:0045926)	0.259009	3.52516	4.85158	TP53
microtubule cytoskeleton organization involved in mitosis (GO:1902850)	0.262389	3.46929	4.72753	BIRC5
regulation of primary metabolic process (GO:0080090)	0.265252	3.41516	4.60817	INS
regulation of response to external stimulus (GO:0032101)	0.265252	3.41516	4.60817	CXCR4
G2/M transition of mitotic cell cycle (GO:0000086)	0.265252	3.41516	4.60817	NES
positive regulation of canonical Wnt signaling pathway (GO:0090263)	0.265252	3.41516	4.60817	EGFR
cell cycle G2/M phase transition (GO:0044839)	0.266838	3.38872	4.55017	NES
defense response to virus (GO:0051607)	0.269993	3.33704	4.43739	PTPRC
transmembrane receptor protein serine/threonine kinase signaling pathway (GO:0007178)	0.269993	3.33704	4.43739	ITGB1
protein localization to plasma membrane (GO:0072659)	0.275023	3.26239	4.27586	TNF
protein localization to cell periphery (GO:1990778)	0.281724	3.16787	4.07374	TNF
negative regulation of DNA-binding transcription factor activity (GO:0043433)	0.286659	3.10047	3.9313	EOMES
regulation of mRNA stability (GO:0043488)	0.291553	3.03586	3.79609	AKT1
positive regulation of cytosolic calcium ion concentration (GO:0007204)	0.293054	3.01492	3.75255	CXCR4
regulation of cytosolic calcium ion concentration (GO:0051480)	0.294549	2.99426	3.70973	CXCR4
positive regulation of Wnt signaling pathway (GO:0030177)	0.302691	2.89503	3.50606	EGFR
cellular response to interleukin-1 (GO:0071347)	0.305805	2.85714	3.42917	HIF1A
peptidyl-serine phosphorylation (GO:0018105)	0.307259	2.83857	3.39164	AKT1
mitotic spindle organization (GO:0007052)	0.308708	2.82023	3.35471	BIRC5
cellular response to starvation (GO:0009267)	0.310151	2.80212	3.31837	TP53
response to lipopolysaccharide (GO:0032496)	0.311589	2.78425	3.2826	IL10
negative regulation of canonical Wnt signaling pathway (GO:0090090)	0.321092	2.68157	3.07932	SOX2
peptidyl-serine modification (GO:0018209)	0.32728	2.6172	2.95382	AKT1
neuron projection development (GO:0031175)	0.330248	2.58614	2.89383	BDNF
defense response to bacterium (GO:0042742)	0.337901	2.51162	2.75135	HLA-A
protein stabilization (GO:0050821)	0.342361	2.46891	2.67067	GAPDH
endoplasmic reticulum to Golgi vesicle-mediated transport (GO:0006888)	0.351386	2.38768	2.51919	INS
regulation of mitotic cell cycle phase transition (GO:1901990)	0.355738	2.34902	2.44804	PTPN6
negative regulation of Wnt signaling pathway (GO:0030178)	0.360054	2.31158	2.37973	SOX2
protein localization to membrane (GO:0072657)	0.365826	2.26346	2.29279	TNF
negative regulation of intracellular signal transduction (GO:1902532)	0.370059	2.22865	2.23052	AKT1
proteasomal protein catabolic process (GO:0010498)	0.380108	2.15142	2.09426	CTNNB1
transcription, DNA-templated (GO:0006351)	0.402744	1.99333	1.82384	TP53
plasma membrane bounded cell projection assembly (GO:0120031)	0.47747	1.57858	1.17471	ITGB1
proteolysis (GO:0006508)	0.488142	1.52821	1.1025	CASP3
DNA repair (GO:0006281)	0.500933	1.47078	1.02213	TP53
protein polyubiquitination (GO:0000209)	0.519077	1.39446	0.918622	CTNNB1
proteasome-mediated ubiquitin-dependent protein catabolic process (GO:0043161)	0.526616	1.36347	0.877709	CTNNB1
post-translational protein modification (GO:0043687)	0.552282	1.2668	0.754418	HIF1A
ubiquitin-dependent protein catabolic process (GO:0006511)	0.561321	1.23393	0.714059	CTNNB1
organelle organization (GO:0006996)	0.624092	1.03606	0.489094	MYC
organelle assembly (GO:0070925)	0.628111	1.02358	0.476007	CD34

## Sheet: GO-CC
Term	Adjusted P-value	Odds Ratio	Combined Score	Genes
membrane raft (GO:0045121)	1.0809e-08	31.2741	717.68	ITGB1;CD4;ITGAM;PTPRC;LCK;CD8A;FYN;TNF;EGFR
bounding membrane of organelle (GO:0098588)	0.00263466	6.16002	60.6825	ITGB1;PTPRC;ERBB2;PECAM1;NCAM1;HLA-A;HRAS;EGFR;INS
T cell receptor complex (GO:0042101)	0.0112194	90.6545	724.934	CD4;CD8A
glial cell projection (GO:0097386)	0.011568	75.5379	580.009	ITGB1;FYN
nucleus (GO:0005634)	0.0204188	2.66922	17.9942	STAT3;PTPN11;MKI67;FGF2;HIF1A;EGFR;ACTB;POU5F1;SOX2;CASP3;MYC;ERBB2;AKT1;BIRC5;CTNNB1;FYN;NANOG;PTPN6;GAPDH;TP53
integral component of plasma membrane (GO:0005887)	0.0204188	3.56071	23.2608	CD4;PTPRC;CD8A;ERBB2;CD28;PECAM1;HLA-A;TNF;CD34;EGFR
cytoplasmic vesicle membrane (GO:0030659)	0.0204188	6.36715	40.4434	ITGB1;PTPRC;ERBB2;PECAM1;EGFR
vesicle (GO:0031982)	0.0204188	8.46504	53.5637	AKT1;GAPDH;EGFR;ACTB
focal adhesion (GO:0005925)	0.0204188	6.24824	39.1893	ITGB1;PTPRC;CTNNB1;EGFR;ACTB
cell-substrate junction (GO:0030055)	0.0204188	6.13361	37.9909	ITGB1;PTPRC;CTNNB1;EGFR;ACTB
early endosome (GO:0005769)	0.0266726	7.15812	41.0768	CD4;CXCR4;HLA-A;EGFR
cell-cell junction (GO:0005911)	0.0266726	7.02229	39.8298	PECAM1;CTNNB1;ACTB;VEGFA
adherens junction (GO:0005912)	0.0266726	10.722	60.7331	CTNNB1;ACTB;VEGFA
basolateral plasma membrane (GO:0016323)	0.0360713	9.33658	49.3753	ERBB2;CTNNB1;EGFR
endocytic vesicle membrane (GO:0030666)	0.0381744	8.91178	46.0089	CD4;HLA-A;EGFR
endosome membrane (GO:0010008)	0.040541	5.82495	29.307	ITGB1;ERBB2;HLA-A;EGFR
nuclear lumen (GO:0031981)	0.040541	3.9002	19.4129	MYC;BIRC5;NANOG;PTPN6;MKI67;TP53
intracellular membrane-bounded organelle (GO:0043231)	0.0409991	2.19852	10.7926	STAT3;PTPN11;MKI67;FGF2;HIF1A;EGFR;ACTB;POU5F1;SOX2;CASP3;MYC;ERBB2;AKT1;BIRC5;CTNNB1;FYN;NANOG;PTPN6;GAPDH;TP53
clathrin-coated endocytic vesicle membrane (GO:0030669)	0.0516814	13.4919	60.8352	CD4;EGFR
glutamatergic synapse (GO:0098978)	0.0516814	13.4919	60.8352	HRAS;ACTB
bleb (GO:0032059)	0.0516814	110.833	495.416	PTPRC
phosphatidylinositol 3-kinase complex, class I (GO:0097651)	0.0516814	110.833	495.416	PIK3CA
cytoskeleton (GO:0005856)	0.0516814	3.96782	17.5867	AKT1;GAPDH;NES;ACTB;GFAP
MHC class I protein complex (GO:0042612)	0.0556446	88.6622	380.247	HLA-A
lytic vacuole (GO:0000323)	0.0556446	6.37532	27.2549	CXCR4;CD34;GFAP
plasma membrane raft (GO:0044853)	0.0564428	11.292	47.2047	ITGAM;CD8A
intracellular non-membrane-bounded organelle (GO:0043232)	0.0564428	2.93214	12.154	MYC;NANOG;PTPN6;MKI67;GAPDH;TP53;ACTB
intermediate filament cytoskeleton (GO:0045111)	0.0564428	11.0155	45.5466	NES;GFAP
clathrin-coated endocytic vesicle (GO:0045334)	0.0564428	10.8823	44.7522	CD4;EGFR
clathrin-coated vesicle membrane (GO:0030665)	0.0588074	10.2614	41.0934	CD4;EGFR
platelet alpha granule (GO:0031091)	0.0588074	10.2614	41.0934	PECAM1;VEGFA
early endosome membrane (GO:0031901)	0.0655621	9.50191	36.7172	HLA-A;EGFR
Golgi membrane (GO:0000139)	0.0693979	3.9654	14.9756	NCAM1;HLA-A;HRAS;INS
Golgi medial cisterna (GO:0005797)	0.0695554	44.32	163.461	HLA-A
intracellular vesicle (GO:0097708)	0.0695554	44.32	163.461	EGFR
secretory granule membrane (GO:0030667)	0.0695554	5.06728	18.6845	ITGAM;PTPRC;PECAM1
nucleolus (GO:0005730)	0.0700071	3.22065	11.7664	MYC;NANOG;PTPN6;MKI67;TP53
beta-catenin-TCF complex (GO:1990907)	0.07763	36.9296	130.117	CTNNB1
secretory granule lumen (GO:0034774)	0.0923056	4.37796	14.5535	PTPN6;INS;VEGFA
platelet alpha granule membrane (GO:0031092)	0.0938215	27.6917	90.2638	PECAM1
neuron projection (GO:0043005)	0.0938215	3.34748	10.906	BDNF;FYN;NCAM1;ACTB
H4/H2A histone acetyltransferase complex (GO:0043189)	0.100065	24.6123	77.544	ACTB
recycling endosome (GO:0055037)	0.100065	6.2972	19.6844	HLA-A;TNF
MHC protein complex (GO:0042611)	0.100065	23.3158	72.2892	HLA-A
NuA4 histone acetyltransferase complex (GO:0035267)	0.100065	23.3158	72.2892	ACTB
chromosome (GO:0005694)	0.111374	5.69505	16.7997	BIRC5;MKI67
specific granule (GO:0042581)	0.111374	5.69505	16.7997	ITGAM;PTPN6
tertiary granule (GO:0070820)	0.113938	5.55331	16.1383	ITGAM;PTPN6
endosome lumen (GO:0031904)	0.118667	17.7147	50.3943	INS
lumenal side of endoplasmic reticulum membrane (GO:0098553)	0.12251	16.4008	45.4779	HLA-A
integral component of lumenal side of endoplasmic reticulum membrane (GO:0071556)	0.12251	16.4008	45.4779	HLA-A
catenin complex (GO:0016342)	0.130082	14.7585	39.4712	CTNNB1
intercalated disc (GO:0014704)	0.130082	14.7585	39.4712	PIK3CA
axon (GO:0030424)	0.148191	4.44464	11.2247	BDNF;ACTB
neuromuscular junction (GO:0031594)	0.152465	11.9622	29.6501	ITGB1
lysosome (GO:0005764)	0.172451	2.86724	6.70205	CXCR4;CD34;GFAP
phagocytic vesicle membrane (GO:0030670)	0.172867	10.0556	23.3023	HLA-A
cell-cell contact zone (GO:0044291)	0.175154	9.61739	21.89	PIK3CA
endoplasmic reticulum-Golgi intermediate compartment membrane (GO:0033116)	0.175154	9.21574	20.6122	INS
intermediate filament (GO:0005882)	0.175154	9.02721	20.0181	NES
sarcolemma (GO:0042383)	0.175154	8.67233	18.9102	ITGB1
Golgi cisterna (GO:0031985)	0.175154	8.50513	18.393	HLA-A
condensed chromosome (GO:0000793)	0.175154	8.34423	17.8983	MKI67
ER to Golgi transport vesicle membrane (GO:0012507)	0.175154	8.34423	17.8983	HLA-A
polymeric cytoskeletal fiber (GO:0099513)	0.175154	3.52541	7.5583	NES;ACTB
coated vesicle membrane (GO:0030662)	0.175154	8.1893	17.4248	HLA-A
cytoplasmic side of plasma membrane (GO:0009898)	0.175154	8.1893	17.4248	PTPRC
tertiary granule lumen (GO:1904724)	0.175154	8.1893	17.4248	PTPN6
recycling endosome membrane (GO:0055038)	0.178837	7.75712	16.1189	HLA-A
filopodium (GO:0030175)	0.178837	7.75712	16.1189	ITGB1
dendrite (GO:0030425)	0.179469	3.33887	6.86795	BDNF;FYN
transport vesicle membrane (GO:0030658)	0.179469	7.49341	15.3335	HLA-A
spindle microtubule (GO:0005876)	0.179762	7.36815	14.9635	BIRC5
specific granule lumen (GO:0035580)	0.180041	7.24699	14.6076	PTPN6
platelet alpha granule lumen (GO:0031093)	0.190912	6.6963	13.0151	VEGFA
actin filament (GO:0005884)	0.201274	6.22316	11.6818	ACTB
tertiary granule membrane (GO:0070821)	0.201274	6.13642	11.4411	ITGAM
lipid droplet (GO:0005811)	0.208664	5.81228	10.5522	GAPDH
COPII-coated ER to Golgi transport vesicle (GO:0030134)	0.210911	5.66268	10.1478	HLA-A
actin-based cell projection (GO:0098858)	0.214579	5.38537	9.40839	ITGB1
nuclear chromosome (GO:0000228)	0.214579	5.38537	9.40839	BIRC5
microtubule cytoskeleton (GO:0015630)	0.214579	2.71138	4.70208	AKT1;GAPDH
tight junction (GO:0070160)	0.214579	5.25661	9.0698	ACTB
specific granule membrane (GO:0035579)	0.225508	4.90469	8.16019	ITGAM
apical junction complex (GO:0043296)	0.236932	4.54914	7.26621	ACTB
phagocytic vesicle (GO:0045335)	0.236932	4.45679	7.03836	HLA-A
Golgi lumen (GO:0005796)	0.236932	4.45679	7.03836	INS
endoplasmic reticulum membrane (GO:0005789)	0.255134	1.89376	2.8289	CD4;HLA-A;HRAS
cytoplasmic vesicle lumen (GO:0060205)	0.262051	3.86745	5.63003	INS
asymmetric synapse (GO:0032279)	0.293941	3.33704	4.43739	FYN
postsynaptic density (GO:0014069)	0.300025	3.21444	4.17299	FYN
integral component of endoplasmic reticulum membrane (GO:0030176)	0.304059	3.12262	3.97795	HLA-A
intracellular organelle lumen (GO:0070013)	0.332832	1.57773	1.85019	PTPN6;EGFR;INS
microtubule (GO:0005874)	0.365536	2.42762	2.59335	BIRC5
late endosome (GO:0005770)	0.372839	2.33641	2.42496	CXCR4
spindle (GO:0005819)	0.37363	2.29936	2.35756	BIRC5
nuclear membrane (GO:0031965)	0.387975	2.16212	2.11299	GAPDH
endoplasmic reticulum lumen (GO:0005788)	0.493517	1.53912	1.11802	INS
actin cytoskeleton (GO:0015629)	0.524993	1.38547	0.906679	ACTB
collagen-containing extracellular matrix (GO:0062023)	0.58663	1.14776	0.612169	NCAM1

## Sheet: GO-MF
Term	Adjusted P-value	Odds Ratio	Combined Score	Genes
kinase binding (GO:0019900)	5.85711e-08	15.3321	332.849	CD4;PTPRC;LCK;STAT3;CTNNB1;PTPN11;PTPN6;PLCG1;HIF1A;TP53;EGFR;ACTB
protein kinase binding (GO:0019901)	1.1473e-06	12.3549	222.898	ITGB1;CD4;PTPRC;LCK;STAT3;PTPN11;PTPN6;PLCG1;HIF1A;TP53;ACTB
receptor ligand activity (GO:0048018)	1.47392e-06	16.0443	278.933	IL10;IL4;IFNG;BDNF;FGF2;TNF;IL2;INS;VEGFA
growth factor activity (GO:0008083)	1.81858e-06	36.8019	621.488	IL10;IL4;BDNF;FGF2;IL2;VEGFA
cytokine activity (GO:0005125)	3.74625e-06	21.3957	339.373	IL10;IL4;IFNG;FGF2;TNF;IL2;VEGFA
growth factor receptor binding (GO:0070851)	3.74625e-06	30.0833	474.09	IL10;IL4;FYN;FGF2;IL2;VEGFA
phosphatase binding (GO:0019902)	5.23965e-06	27.5639	420.889	LCK;ERBB2;STAT3;CTNNB1;TP53;EGFR
protein phosphatase binding (GO:0019903)	7.19311e-06	25.4321	376.882	LCK;ERBB2;STAT3;CTNNB1;TP53;EGFR
RNA polymerase II-specific DNA-binding transcription factor binding (GO:0061629)	8.09146e-05	16.1168	197.933	EOMES;STAT3;CTNNB1;HIF1A;TP53;ACTB
protease binding (GO:0002020)	0.000116447	21.4127	252.921	ITGB1;CD28;TNF;TP53;INS
transcription regulatory region nucleic acid binding (GO:0001067)	0.000124045	14.3796	167.569	SOX2;STAT3;NANOG;TNF;TP53;POU5F1
disordered domain specific binding (GO:0097718)	0.000255447	69.5372	754.05	FYN;GAPDH;TP53
protein tyrosine kinase binding (GO:1990782)	0.000271359	27.8515	298.105	ITGB1;CD4;PTPN11;TP53
transcription cis-regulatory region binding (GO:0000976)	0.000357479	7.55443	78.2157	SOX2;MYC;STAT3;NANOG;TNF;HIF1A;TP53;POU5F1
chemokine binding (GO:0019956)	0.000564104	47.935	471.128	ITGB1;CXCR4;FGF2
DNA binding (GO:0003677)	0.000773473	5.80872	54.7257	SOX2;EOMES;MYC;STAT3;NANOG;HIF1A;TP53;EGFR;POU5F1
phosphotyrosine residue binding (GO:0001784)	0.000773473	40.8755	383.725	LCK;PTPN11;PTPN6
cytokine receptor binding (GO:0005126)	0.000861591	18.7204	172.651	IL10;IL4;IL2;VEGFA
protein tyrosine kinase activity (GO:0004713)	0.000882072	18.1777	165.659	LCK;ERBB2;FYN;EGFR
DNA-binding transcription factor binding (GO:0140297)	0.000882072	11.8653	107.9	EOMES;MYC;STAT3;CTNNB1;TP53
protein phosphorylated amino acid binding (GO:0045309)	0.0009177	35.6261	320.826	LCK;PTPN11;PTPN6
phospholipase activator activity (GO:0016004)	0.00200458	100.732	823.741	LCK;FYN
lipase activator activity (GO:0060229)	0.00226225	90.6545	724.934	LCK;FYN
ubiquitin protein ligase binding (GO:0031625)	0.00226225	9.23734	73.6178	CXCR4;HIF1A;TP53;EGFR;POU5F1
ubiquitin-like protein ligase binding (GO:0044389)	0.00279411	8.66294	66.5781	CXCR4;HIF1A;TP53;EGFR;POU5F1
phospholipase binding (GO:0043274)	0.00279411	75.5379	580.009	LCK;FYN
transmembrane receptor protein phosphatase activity (GO:0019198)	0.00341135	64.7403	479.381	PTPRC;PTPN6
transmembrane receptor protein tyrosine phosphatase activity (GO:0005001)	0.00341135	64.7403	479.381	PTPRC;PTPN6
protein tyrosine phosphatase activity (GO:0004725)	0.00356431	19.5378	143.129	PTPRC;PTPN11;PTPN6
protein heterodimerization activity (GO:0046982)	0.00474386	10.2329	71.6914	ITGB1;ERBB2;HIF1A;TP53
histone acetyltransferase binding (GO:0035035)	0.00535282	47.6914	326.8	HIF1A;TP53
sequence-specific double-stranded DNA binding (GO:1990837)	0.00551219	4.90064	33.2817	SOX2;EOMES;STAT3;NANOG;TNF;TP53;POU5F1
MHC protein binding (GO:0042287)	0.00895894	34.8392	218.61	CD4;CD8A
miRNA binding (GO:0035198)	0.00997745	32.3474	198.526	SOX2;POU5F1
chemoattractant activity (GO:0042056)	0.0110193	30.1879	181.399	FGF2;VEGFA
non-membrane spanning protein tyrosine kinase activity (GO:0004715)	0.0127953	27.4394	160.01	LCK;FYN
core promoter sequence-specific DNA binding (GO:0001046)	0.0138944	25.8688	148.011	MYC;TP53
tau protein binding (GO:0048156)	0.0153708	23.823	132.646	FYN;ACTB
regulatory RNA binding (GO:0061980)	0.0153708	23.823	132.646	SOX2;POU5F1
RNA polymerase II cis-regulatory region sequence-specific DNA binding (GO:0000978)	0.0164492	3.47119	18.9185	SOX2;EOMES;MYC;STAT3;NANOG;HIF1A;TP53;POU5F1
cis-regulatory region sequence-specific DNA binding (GO:0000987)	0.0164492	3.47119	18.9185	SOX2;EOMES;MYC;STAT3;NANOG;HIF1A;TP53;POU5F1
cadherin binding (GO:0045296)	0.023636	5.8808	29.7778	ITGB1;CTNNB1;PTPN11;EGFR
DNA-binding transcription activator activity, RNA polymerase II-specific (GO:0001228)	0.0259438	5.681	28.1031	MYC;STAT3;HIF1A;TP53
transmembrane receptor protein kinase activity (GO:0019199)	0.0293608	15.5925	74.4958	ERBB2;EGFR
transmembrane receptor protein tyrosine kinase activity (GO:0004714)	0.0293608	15.5925	74.4958	ERBB2;EGFR
collagen binding involved in cell-matrix adhesion (GO:0098639)	0.0333947	110.833	495.416	ITGB1
complement component C3b binding (GO:0001851)	0.0333947	110.833	495.416	ITGAM
ErbB-3 class receptor binding (GO:0043125)	0.0333947	110.833	495.416	ERBB2
potassium channel activator activity (GO:0099104)	0.0333947	110.833	495.416	AKT1
MHC class I protein complex binding (GO:0023024)	0.0333947	110.833	495.416	CD8A
C-X-C chemokine receptor activity (GO:0016494)	0.0333947	110.833	495.416	CXCR4
C-X3-C chemokine binding (GO:0019960)	0.0333947	110.833	495.416	ITGB1
CCR5 chemokine receptor binding (GO:0031730)	0.0333947	110.833	495.416	NES
RNA polymerase II transcription regulatory region sequence-specific DNA binding (GO:0000977)	0.0333947	2.89891	12.9483	SOX2;EOMES;MYC;STAT3;NANOG;HIF1A;TP53;POU5F1
ATPase binding (GO:0051117)	0.0349995	12.7292	56.0254	LCK;EGFR
primary miRNA binding (GO:0070878)	0.0353185	88.6622	380.247	STAT3
MHC class II protein binding (GO:0042289)	0.0353185	88.6622	380.247	CD4
myosin light chain binding (GO:0032027)	0.0353185	88.6622	380.247	CXCR4
neurotrophin TRK receptor binding (GO:0005167)	0.0353185	88.6622	380.247	PLCG1
neurotrophin TRKA receptor binding (GO:0005168)	0.0353185	88.6622	380.247	PLCG1
non-membrane spanning protein tyrosine phosphatase activity (GO:0004726)	0.0353185	88.6622	380.247	PTPN11
protein homodimerization activity (GO:0042803)	0.0379321	3.73449	15.6889	CD4;STAT3;PECAM1;AKT1;VEGFA
1-phosphatidylinositol-4-phosphate 3-kinase activity (GO:0035005)	0.0380406	73.8815	305.551	PIK3CA
aspartic-type endopeptidase inhibitor activity (GO:0019828)	0.0380406	73.8815	305.551	GAPDH
cell-matrix adhesion mediator activity (GO:0098634)	0.0380406	73.8815	305.551	ITGB1
nitric-oxide synthase binding (GO:0050998)	0.0380406	73.8815	305.551	ACTB
G protein-coupled glutamate receptor binding (GO:0035256)	0.0415381	63.3238	253.503	FYN
vascular endothelial growth factor receptor 2 binding (GO:0043184)	0.0415381	63.3238	253.503	VEGFA
CD4 receptor binding (GO:0042609)	0.0415381	63.3238	253.503	LCK
DNA-binding transcription repressor activity, RNA polymerase II-specific (GO:0001227)	0.0470907	5.43276	20.9891	MYC;NANOG;POU5F1
sequence-specific DNA binding (GO:0043565)	0.0483057	3.34445	12.6772	SOX2;EOMES;NANOG;HIF1A;POU5F1
1-phosphatidylinositol-3-kinase activity (GO:0016303)	0.0483057	49.2469	186.271	PIK3CA
cysteine-type endopeptidase activity involved in apoptotic signaling pathway (GO:0097199)	0.0483057	49.2469	186.271	CASP3
Tat protein binding (GO:0030957)	0.0483057	49.2469	186.271	ACTB
histone methyltransferase binding (GO:1990226)	0.05168	44.32	163.461	CTNNB1
MAP kinase kinase kinase activity (GO:0004709)	0.05168	44.32	163.461	EGFR
phosphatidylinositol 3-kinase activity (GO:0035004)	0.0537892	40.2889	145.133	PIK3CA
tumor necrosis factor receptor binding (GO:0005164)	0.0537892	40.2889	145.133	TNF
vascular endothelial growth factor receptor binding (GO:0005172)	0.0537892	40.2889	145.133	VEGFA
kinase activity (GO:0016301)	0.0537892	8.2	29.4946	PIK3CA;AKT1
I-SMAD binding (GO:0070411)	0.0551358	36.9296	130.117	CTNNB1
cysteine-type endopeptidase activity involved in execution phase of apoptosis (GO:0097200)	0.0551358	36.9296	130.117	CASP3
phosphatidylinositol phosphate kinase activity (GO:0016307)	0.0551358	36.9296	130.117	PIK3CA
platelet-derived growth factor receptor binding (GO:0005161)	0.0551358	36.9296	130.117	VEGFA
nuclear receptor binding (GO:0016922)	0.0574832	7.64099	26.5131	CTNNB1;HIF1A
insulin-like growth factor receptor binding (GO:0005159)	0.0579311	34.0872	117.614	INS
tubulin binding (GO:0015631)	0.059244	4.50964	15.3194	BIRC5;FYN;GAPDH
cysteine-type endopeptidase activity involved in apoptotic process (GO:0097153)	0.059244	31.6508	107.06	CASP3
death receptor binding (GO:0005123)	0.059244	31.6508	107.06	BDNF
phosphatidylinositol kinase activity (GO:0052742)	0.059244	31.6508	107.06	PIK3CA
MHC class I protein binding (GO:0042288)	0.0655366	27.6917	90.2638	CD8A
MHC class II protein complex binding (GO:0023026)	0.0655366	27.6917	90.2638	CD4
ankyrin binding (GO:0030506)	0.0722972	24.6123	77.544	PTPRC
tau-protein kinase activity (GO:0050321)	0.0752086	23.3158	72.2892	FYN
cysteine-type endopeptidase inhibitor activity involved in apoptotic process (GO:0043027)	0.0772374	22.1489	67.6154	BIRC5
ephrin receptor binding (GO:0046875)	0.0772374	22.1489	67.6154	FYN
phosphatidylinositol phospholipase C activity (GO:0004435)	0.0818467	20.1333	59.6759	PLCG1
fibroblast growth factor receptor binding (GO:0005104)	0.0818467	20.1333	59.6759	FGF2
C-C chemokine receptor activity (GO:0016493)	0.0818467	20.1333	59.6759	CXCR4
C-C chemokine binding (GO:0019957)	0.0836206	19.257	56.2803	CXCR4
protein phosphatase 2A binding (GO:0051721)	0.0836206	19.257	56.2803	TP53
phospholipase C activity (GO:0004629)	0.0861546	18.4537	53.1999	PLCG1
chemokine receptor activity (GO:0004950)	0.0877796	17.7147	50.3943	CXCR4
phosphatidylinositol-3,4-bisphosphate binding (GO:0043325)	0.0877796	17.7147	50.3943	AKT1
double-stranded DNA binding (GO:0003690)	0.0909423	2.84198	7.90439	EOMES;NANOG;EGFR;POU5F1
tumor necrosis factor receptor superfamily binding (GO:0032813)	0.0909423	16.4008	45.4779	TNF
protein serine/threonine/tyrosine kinase activity (GO:0004712)	0.0909423	16.4008	45.4779	AKT1
actin binding (GO:0003779)	0.0909423	5.1374	14.2391	ITGB1;CXCR4
kinesin binding (GO:0019894)	0.0931048	15.8143	43.3142	ACTB
kinase activator activity (GO:0019209)	0.0975149	14.7585	39.4712	IL2
alpha-tubulin binding (GO:0043014)	0.0975149	14.7585	39.4712	FYN
SH2 domain binding (GO:0042169)	0.0996507	14.2817	37.7585	LCK
nucleosomal DNA binding (GO:0031492)	0.10085	13.8347	36.1664	ACTB
RNA polymerase core enzyme binding (GO:0043175)	0.10085	13.8347	36.1664	ERBB2
Hsp90 protein binding (GO:0051879)	0.103987	13.0196	33.2984	HIF1A
phosphatidylinositol-3,4,5-trisphosphate binding (GO:0005547)	0.103987	13.0196	33.2984	AKT1
estrogen receptor binding (GO:0030331)	0.103987	13.0196	33.2984	CTNNB1
signaling receptor complex adaptor activity (GO:0030159)	0.11438	11.6468	28.5788	PTPN11
cysteine-type endopeptidase inhibitor activity (GO:0004869)	0.116198	11.3476	27.5699	BIRC5
E-box binding (GO:0070888)	0.117979	11.0633	26.6184	MYC
CCR chemokine receptor binding (GO:0048020)	0.119725	10.793	25.7198	NES
copper ion binding (GO:0005507)	0.126802	10.0556	23.3023	TP53
microtubule binding (GO:0008017)	0.127037	3.89802	8.99404	BIRC5;GAPDH
potassium channel regulator activity (GO:0015459)	0.137853	9.02721	20.0181	AKT1
nuclear receptor coactivator activity (GO:0030374)	0.143328	8.50513	18.393	FGF2
transcription coregulator binding (GO:0001221)	0.143328	8.50513	18.393	CTNNB1
myosin binding (GO:0017022)	0.148582	8.04	16.9711	CXCR4
receptor tyrosine kinase binding (GO:0030971)	0.148582	8.04	16.9711	TP53
protein serine/threonine phosphatase activity (GO:0004722)	0.162149	7.24699	14.6076	LCK
GDP binding (GO:0019003)	0.172923	6.6963	13.0151	HRAS
ubiquitin binding (GO:0043130)	0.188079	6.05205	11.2081	CXCR4
phosphotransferase activity, alcohol group as acceptor (GO:0016773)	0.188969	5.96997	10.9825	PIK3CA
hormone activity (GO:0005179)	0.194409	5.73651	10.3469	INS
amyloid-beta binding (GO:0001540)	0.197473	5.59072	9.95461	ITGAM
mRNA 3'-UTR binding (GO:0003730)	0.207124	5.25661	9.0698	TP53
zinc ion binding (GO:0008270)	0.20856	2.67011	4.56889	CD4;TP53
cytokine receptor activity (GO:0004896)	0.210613	5.07458	8.59634	CD4
protein serine/threonine kinase activity (GO:0004674)	0.213076	2.60659	4.3663	AKT1;EGFR
histone deacetylase binding (GO:0042826)	0.218183	4.79758	7.88815	TP53
cysteine-type peptidase activity (GO:0008234)	0.227031	4.54914	7.26621	CASP3
phosphatidylinositol phosphate binding (GO:1901981)	0.233604	4.3681	6.82129	AKT1
cysteine-type endopeptidase activity (GO:0004197)	0.238004	4.24145	6.51439	CASP3
endopeptidase inhibitor activity (GO:0004866)	0.256059	3.86745	5.63003	GAPDH
transition metal ion binding (GO:0046914)	0.297611	2.00195	2.59933	CD4;TP53
purine ribonucleoside triphosphate binding (GO:0035639)	0.309468	1.93489	2.42329	AKT1;HRAS
small GTPase binding (GO:0031267)	0.357919	2.52618	2.77902	BIRC5
GTP binding (GO:0005525)	0.378292	2.33641	2.42496	HRAS
GTPase binding (GO:0051020)	0.394588	2.19489	2.17063	BIRC5
guanyl ribonucleotide binding (GO:0032561)	0.411656	2.05957	1.93572	HRAS
GTPase activity (GO:0003924)	0.411874	2.04021	1.9028	HRAS
RNA binding (GO:0003723)	0.423041	1.26024	1.13327	STAT3;HLA-A;MKI67;POU5F1
mRNA binding (GO:0003729)	0.471447	1.67023	1.30998	TP53
nucleoside-triphosphatase activity (GO:0017111)	0.484391	1.57858	1.17471	HRAS
ATP binding (GO:0005524)	0.484391	1.57858	1.17471	AKT1
G protein-coupled receptor activity (GO:0004930)	0.487438	1.5502	1.13383	CXCR4
adenyl ribonucleotide binding (GO:0032559)	0.511636	1.43162	0.968537	AKT1
endopeptidase activity (GO:0004175)	0.518618	1.38995	0.912625	CASP3

## Sheet: KEGG
Kaposi sarcoma-associated herpesvirus infection	Adjusted P-value	Odds Ratio	Combined Score	Genes
Proteoglycans in cancer	5.22149e-26	82.1996	5214.31	ITGB1;STAT3;PTPN11;FGF2;TNF;HIF1A;EGFR;ACTB;VEGFA;PIK3CA;CASP3;MYC;ERBB2;AKT1;CTNNB1;NANOG;PTPN6;PLCG1;HRAS;TP53
T cell receptor signaling pathway	6.89002e-24	120.4	6966.24	IL10;TNF;IL2;IL4;CD4;PTPRC;IFNG;PIK3CA;LCK;CD8A;CD28;AKT1;FYN;PTPN6;PLCG1;HRAS
PD-L1 expression and PD-1 checkpoint pathway in cancer	5.98507e-19	103.036	4748.06	STAT3;PTPN11;HIF1A;EGFR;CD4;IFNG;PIK3CA;LCK;CD28;AKT1;PTPN6;PLCG1;HRAS
Pathways in cancer	2.90539e-18	29.2684	1294.07	ITGB1;STAT3;CXCR4;FGF2;HIF1A;EGFR;IL2;VEGFA;IL4;IFNG;PIK3CA;CASP3;MYC;ERBB2;AKT1;BIRC5;CTNNB1;PLCG1;HRAS;TP53
JAK-STAT signaling pathway	1.18368e-15	52.3622	1988.77	IL10;STAT3;PTPN11;EGFR;IL2;GFAP;IL4;IFNG;PIK3CA;MYC;AKT1;PTPN6;HRAS
Kaposi sarcoma-associated herpesvirus infection	9.93376e-15	43.2764	1543.73	STAT3;HLA-A;FGF2;HIF1A;VEGFA;PIK3CA;CASP3;MYC;AKT1;CTNNB1;PLCG1;HRAS;TP53
HIF-1 signaling pathway	2.25706e-14	63.6781	2209.41	IFNG;PIK3CA;ERBB2;STAT3;AKT1;PLCG1;HIF1A;GAPDH;EGFR;INS;VEGFA
Human cytomegalovirus infection	5.53168e-14	36.6847	1235.05	STAT3;CXCR4;HLA-A;TNF;EGFR;VEGFA;PIK3CA;CASP3;MYC;AKT1;CTNNB1;HRAS;TP53
Natural killer cell mediated cytotoxicity	1.40099e-13	51.9462	1694.46	IFNG;PIK3CA;LCK;CASP3;FYN;PTPN11;PTPN6;PLCG1;HLA-A;TNF;HRAS
Yersinia infection	2.08378e-13	49.4576	1588.44	ITGB1;IL10;CD4;PIK3CA;LCK;CD8A;AKT1;PLCG1;TNF;ACTB;IL2
PI3K-Akt signaling pathway	5.54298e-13	25.2386	783.495	ITGB1;BDNF;FGF2;EGFR;IL2;INS;VEGFA;IL4;PIK3CA;MYC;ERBB2;AKT1;HRAS;TP53
Rap1 signaling pathway	5.73971e-13	35.2157	1088.93	ITGB1;ITGAM;PIK3CA;AKT1;CTNNB1;PLCG1;FGF2;HRAS;EGFR;ACTB;INS;VEGFA
Hepatitis C	7.33185e-13	42.6395	1304.63	IFNG;PIK3CA;CASP3;MYC;STAT3;AKT1;CTNNB1;TNF;HRAS;TP53;EGFR
Colorectal cancer	4.17857e-12	62.7915	1807.29	PIK3CA;CASP3;MYC;AKT1;BIRC5;CTNNB1;HRAS;TP53;EGFR
Endometrial cancer	8.93657e-12	83.8063	2342.65	PIK3CA;MYC;ERBB2;AKT1;CTNNB1;HRAS;TP53;EGFR
Signaling pathways regulating pluripotency of stem cells	9.60636e-12	41.3972	1151.52	SOX2;PIK3CA;MYC;STAT3;AKT1;CTNNB1;NANOG;FGF2;HRAS;POU5F1
Cell adhesion molecules	1.27863e-11	39.8873	1095.7	ITGB1;CD4;ITGAM;PTPRC;CD8A;CD28;PECAM1;NCAM1;HLA-A;CD34
MAPK signaling pathway	2.08358e-11	24.6208	662.898	BDNF;CASP3;MYC;ERBB2;AKT1;FGF2;TNF;HRAS;TP53;EGFR;INS;VEGFA
Allograft rejection	2.4579e-11	115.352	3080.49	IL10;IL4;IFNG;CD28;HLA-A;TNF;IL2
Central carbon metabolism in cancer	3.23472e-11	67.545	1781.78	PIK3CA;MYC;ERBB2;AKT1;HIF1A;HRAS;TP53;EGFR
Leukocyte transendothelial migration	3.71575e-11	45.9822	1203.96	ITGB1;ITGAM;PIK3CA;PECAM1;CXCR4;CTNNB1;PTPN11;PLCG1;ACTB
Non-small cell lung cancer	3.71575e-11	65.4276	1710.62	PIK3CA;ERBB2;STAT3;AKT1;PLCG1;HRAS;TP53;EGFR
Thyroid hormone signaling pathway	5.89372e-11	43.0931	1104.88	PIK3CA;MYC;AKT1;CTNNB1;PLCG1;HIF1A;HRAS;TP53;ACTB
Focal adhesion	1.90845e-10	28.742	701.673	ITGB1;PIK3CA;ERBB2;AKT1;CTNNB1;FYN;HRAS;EGFR;ACTB;VEGFA
Fluid shear stress and atherosclerosis	1.90845e-10	37.0927	904.359	IFNG;PIK3CA;PECAM1;AKT1;CTNNB1;TNF;TP53;ACTB;VEGFA
Breast cancer	3.04044e-10	34.9283	833.952	PIK3CA;MYC;ERBB2;AKT1;CTNNB1;FGF2;HRAS;TP53;EGFR
Gastric cancer	3.30673e-10	34.4259	817.766	PIK3CA;MYC;ERBB2;AKT1;CTNNB1;FGF2;HRAS;TP53;EGFR
Prostate cancer	3.3792e-10	46.9899	1113.49	PIK3CA;ERBB2;AKT1;CTNNB1;HRAS;TP53;EGFR;INS
Human T-cell leukemia virus 1 infection	3.71766e-10	26.2427	618.43	CD4;PIK3CA;LCK;MYC;AKT1;HLA-A;TNF;HRAS;TP53;IL2
AGE-RAGE signaling pathway in diabetic complications	4.04049e-10	45.4508	1065.76	PIK3CA;CASP3;STAT3;AKT1;PLCG1;TNF;HRAS;VEGFA
Hepatitis B	5.94008e-10	31.4801	724.143	PIK3CA;CASP3;MYC;STAT3;AKT1;BIRC5;TNF;HRAS;TP53
Ras signaling pathway	5.94008e-10	24.6897	567.832	PIK3CA;BDNF;AKT1;PTPN11;PLCG1;FGF2;HRAS;EGFR;INS;VEGFA
Th17 cell differentiation	6.3581e-10	42.2222	966.888	IL4;CD4;IFNG;LCK;STAT3;PLCG1;HIF1A;IL2
Hepatocellular carcinoma	7.70722e-10	30.283	686.749	PIK3CA;MYC;AKT1;CTNNB1;PLCG1;HRAS;TP53;EGFR;ACTB
Human papillomavirus infection	9.09351e-10	19.2834	433.554	ITGB1;PIK3CA;CASP3;AKT1;CTNNB1;HLA-A;TNF;HRAS;TP53;EGFR;VEGFA
Fc epsilon RI signaling pathway	9.46756e-10	58.5334	1312.02	IL4;PIK3CA;AKT1;FYN;PLCG1;TNF;HRAS
Salmonella infection	1.02703e-09	22.9138	511.115	PTPRC;PIK3CA;CASP3;MYC;AKT1;CTNNB1;TNF;HRAS;GAPDH;ACTB
Pancreatic cancer	1.99521e-09	51.7261	1118.08	PIK3CA;ERBB2;STAT3;AKT1;TP53;EGFR;VEGFA
Bladder cancer	2.08143e-09	85.3671	1837.93	MYC;ERBB2;HRAS;TP53;EGFR;VEGFA
Leishmaniasis	2.08143e-09	50.9846	1097.27	ITGB1;IL10;IL4;ITGAM;IFNG;PTPN6;TNF
Type I diabetes mellitus	2.72182e-09	80.7446	1714.11	IFNG;CD28;HLA-A;TNF;IL2;INS
ErbB signaling pathway	4.01345e-09	45.737	952.076	PIK3CA;MYC;ERBB2;AKT1;PLCG1;HRAS;EGFR
Apoptosis	4.69982e-09	31.139	642.337	PIK3CA;CASP3;AKT1;BIRC5;TNF;HRAS;TP53;ACTB
Human immunodeficiency virus 1 infection	4.69982e-09	23.6665	487.811	CD4;PIK3CA;CASP3;CXCR4;AKT1;PLCG1;HLA-A;TNF;HRAS
Regulation of actin cytoskeleton	5.87658e-09	22.9801	468.012	ITGB1;ITGAM;PIK3CA;CXCR4;FGF2;HRAS;EGFR;ACTB;INS
Phospholipase D signaling pathway	6.14819e-09	29.7955	604.813	PIK3CA;AKT1;FYN;PTPN11;PLCG1;HRAS;EGFR;INS
MicroRNAs in cancer	6.78198e-09	18.1981	367.224	PIK3CA;CASP3;MYC;ERBB2;STAT3;PLCG1;HRAS;TP53;EGFR;VEGFA
Chemical carcinogenesis	1.23521e-08	20.8597	407.986	PIK3CA;MYC;STAT3;AKT1;BIRC5;FGF2;HRAS;EGFR;VEGFA
C-type lectin receptor signaling pathway	1.43327e-08	36.7431	712.421	IL10;PIK3CA;AKT1;PTPN11;TNF;HRAS;IL2
Toxoplasmosis	2.36283e-08	33.9299	640.229	ITGB1;IL10;IFNG;CASP3;STAT3;AKT1;TNF
Inflammatory bowel disease	2.85487e-08	50.5805	943.842	IL10;IL4;IFNG;STAT3;TNF;IL2
Acute myeloid leukemia	3.37133e-08	48.9172	903.72	ITGAM;PIK3CA;MYC;STAT3;AKT1;HRAS
Neurotrophin signaling pathway	3.4057e-08	31.7981	586.525	PIK3CA;BDNF;AKT1;PTPN11;PLCG1;HRAS;TP53
Renal cell carcinoma	3.88639e-08	47.3595	866.422	PIK3CA;AKT1;PTPN11;HIF1A;HRAS;VEGFA
Adherens junction	4.54308e-08	45.8977	831.671	ERBB2;CTNNB1;FYN;PTPN6;EGFR;ACTB
Pathogenic Escherichia coli infection	4.77399e-08	22.0162	397.293	ITGB1;CASP3;FYN;PTPN11;PTPN6;TNF;GAPDH;ACTB
Melanoma	4.77399e-08	45.2	815.173	PIK3CA;AKT1;FGF2;HRAS;TP53;EGFR
Epstein-Barr virus infection	5.64459e-08	21.4433	382.761	PIK3CA;CASP3;MYC;STAT3;AKT1;HLA-A;TNF;TP53
Glioma	5.87166e-08	43.2283	768.868	PIK3CA;AKT1;PLCG1;HRAS;TP53;EGFR
FoxO signaling pathway	5.87166e-08	28.7035	510.249	IL10;PIK3CA;STAT3;AKT1;HRAS;EGFR;INS
Chronic myeloid leukemia	6.19933e-08	42.6086	754.415	PIK3CA;MYC;AKT1;PTPN11;HRAS;TP53
Measles	8.4442e-08	26.953	468.06	PIK3CA;CASP3;STAT3;CD28;AKT1;TP53;IL2
Lipid and atherosclerosis	8.4442e-08	20.0834	348.737	PIK3CA;CASP3;STAT3;AKT1;PLCG1;TNF;HRAS;TP53
Graft-versus-host disease	1.18692e-07	65.646	1116.52	IFNG;CD28;HLA-A;TNF;IL2
Small cell lung cancer	1.81823e-07	34.6535	573.548	ITGB1;PIK3CA;CASP3;MYC;AKT1;TP53
Th1 and Th2 cell differentiation	1.81823e-07	34.6535	573.548	IL4;CD4;IFNG;LCK;PLCG1;IL2
Shigellosis	2.22568e-07	17.4401	284.67	ITGB1;PIK3CA;AKT1;PLCG1;TNF;TP53;EGFR;ACTB
Intestinal immune network for IgA production	2.22568e-07	56.4691	921.512	IL10;IL4;CD28;CXCR4;IL2
Choline metabolism in cancer	2.54104e-07	32.3837	523.702	PIK3CA;AKT1;PLCG1;HIF1A;HRAS;EGFR
Hematopoietic cell lineage	2.66176e-07	32.0339	516.097	IL4;CD4;ITGAM;CD8A;TNF;CD34
Amoebiasis	3.09384e-07	31.0281	494.352	IL10;ITGAM;IFNG;PIK3CA;CASP3;TNF
Chagas disease	3.09384e-07	31.0281	494.352	IL10;IFNG;PIK3CA;AKT1;TNF;IL2
Autoimmune thyroid disease	3.44503e-07	50.5742	799.632	IL10;IL4;CD28;HLA-A;IL2
Insulin resistance	4.23393e-07	29.1941	455.173	PIK3CA;STAT3;AKT1;PTPN11;TNF;INS
Axon guidance	4.50421e-07	20.2862	314.759	ITGB1;PIK3CA;CXCR4;FYN;PTPN11;PLCG1;HRAS
VEGF signaling pathway	5.714e-07	44.9413	686.02	PIK3CA;AKT1;PLCG1;HRAS;VEGFA
Viral myocarditis	6.142e-07	44.122	669.749	CASP3;CD28;FYN;HLA-A;ACTB
Sphingolipid signaling pathway	7.14795e-07	26.3376	395.457	PIK3CA;AKT1;FYN;TNF;HRAS;TP53
Osteoclast differentiation	1.037e-06	24.5864	359.701	IFNG;PIK3CA;LCK;AKT1;FYN;TNF
Prolactin signaling pathway	1.28787e-06	37.3152	537.371	PIK3CA;STAT3;AKT1;HRAS;INS
Pertussis	1.92182e-06	34.1515	477.716	ITGB1;IL10;ITGAM;CASP3;TNF
Antigen processing and presentation	2.16187e-06	33.2125	460.265	CD4;IFNG;CD8A;HLA-A;TNF
Cellular senescence	3.29927e-06	19.804	265.836	PIK3CA;MYC;AKT1;HLA-A;HRAS;TP53
Thyroid cancer	3.36903e-06	57.4921	769.843	MYC;CTNNB1;HRAS;TP53
Primary immunodeficiency	3.71485e-06	55.7983	741.051	CD4;PTPRC;CD8A;LCK
Alzheimer disease	3.78748e-06	11.4262	151.394	PIK3CA;CASP3;AKT1;CTNNB1;TNF;HRAS;GAPDH;INS
Influenza A	5.55185e-06	17.8807	229.871	IFNG;PIK3CA;CASP3;AKT1;TNF;ACTB
Tuberculosis	7.13986e-06	17.0517	214.73	IL10;ITGAM;IFNG;CASP3;AKT1;TNF
Longevity regulating pathway	7.54285e-06	24.9648	312.725	PIK3CA;AKT1;HRAS;TP53;INS
Cytokine-cytokine receptor interaction	9.50904e-06	12.2562	150.553	IL10;IL4;CD4;IFNG;CXCR4;TNF;IL2
Chemokine signaling pathway	1.00152e-05	15.9419	194.825	PIK3CA;STAT3;CXCR4;AKT1;PLCG1;HRAS
Malaria	1.04948e-05	41.2174	501.335	IL10;IFNG;PECAM1;TNF
Viral carcinogenesis	1.34912e-05	15.0434	179.035	PIK3CA;CASP3;STAT3;HLA-A;HRAS;TP53
Growth hormone synthesis, secretion and action	1.52115e-05	21.2238	249.815	PIK3CA;STAT3;AKT1;PLCG1;HRAS
Platelet activation	1.83971e-05	20.3269	235.178	ITGB1;PIK3CA;AKT1;FYN;ACTB
Relaxin signaling pathway	2.2066e-05	19.5024	221.888	PIK3CA;AKT1;HRAS;EGFR;VEGFA
Coronavirus disease	2.76792e-05	13.0938	145.871	PIK3CA;STAT3;PLCG1;TNF;EGFR;IL2
Autophagy	2.89401e-05	18.313	203.012	PIK3CA;AKT1;HIF1A;HRAS;INS
Herpes simplex virus 1 infection	2.96384e-05	8.36262	92.421	IFNG;PIK3CA;CASP3;AKT1;PTPN11;HLA-A;TNF;TP53
Calcium signaling pathway	3.25271e-05	12.641	138.402	ERBB2;CXCR4;PLCG1;FGF2;EGFR;VEGFA
Adipocytokine signaling pathway	3.47586e-05	29.1414	316.834	STAT3;AKT1;PTPN11;TNF
Epithelial cell signaling in Helicobacter pylori infection	3.64426e-05	28.6984	310.378	CASP3;PTPN11;PLCG1;EGFR
mTOR signaling pathway	4.84008e-05	16.2097	170.552	PIK3CA;AKT1;TNF;HRAS;INS
Non-alcoholic fatty liver disease	4.94487e-05	16.1008	168.906	PIK3CA;CASP3;AKT1;TNF;INS
Bacterial invasion of epithelial cells	5.164e-05	25.9374	270.724	ITGB1;PIK3CA;CTNNB1;ACTB
Hippo signaling pathway	6.1749e-05	15.2794	156.604	SOX2;MYC;BIRC5;CTNNB1;ACTB
B cell receptor signaling pathway	6.18838e-05	24.585	251.696	PIK3CA;AKT1;PTPN6;HRAS
Asthma	8.38004e-05	49.6495	492.786	IL10;IL4;TNF
Rheumatoid arthritis	0.000104484	21.2574	206.1	IFNG;CD28;TNF;VEGFA
IL-17 signaling pathway	0.000107955	21.0201	202.921	IL4;IFNG;CASP3;TNF
Neutrophil extracellular trap formation	0.000119243	13.1031	125.072	ITGAM;PIK3CA;AKT1;PLCG1;ACTB
Fc gamma R-mediated phagocytosis	0.000119863	20.339	193.851	PTPRC;PIK3CA;AKT1;PLCG1
Viral protein interaction with cytokine and cytokine receptor	0.000133777	19.7004	185.426	IL10;CXCR4;TNF;IL2
African trypanosomiasis	0.000135913	40.8755	383.725	IL10;IFNG;TNF
TNF signaling pathway	0.000204057	17.5009	157.027	PIK3CA;CASP3;AKT1;TNF
Cholinergic synapse	0.000209371	17.3394	154.983	PIK3CA;AKT1;FYN;HRAS
Type II diabetes mellitus	0.000255001	32.3056	282.106	PIK3CA;TNF;INS
Systemic lupus erythematosus	0.000407697	14.4115	118.962	IL10;IFNG;CD28;TNF
Regulation of lipolysis in adipocytes	0.000420546	26.7021	218.952	PIK3CA;AKT1;INS
Estrogen signaling pathway	0.000420546	14.1933	116.364	PIK3CA;AKT1;HRAS;EGFR
Insulin signaling pathway	0.000420546	14.1933	116.364	PIK3CA;AKT1;HRAS;INS
Legionellosis	0.000463113	25.7106	208.098	ITGAM;CASP3;TNF
Prion disease	0.000596021	8.95795	70.1713	PIK3CA;CASP3;FYN;NCAM1;TNF
Phagosome	0.000609075	12.7452	99.4588	ITGB1;ITGAM;HLA-A;ACTB
GnRH secretion	0.00063641	22.7522	176.368	PIK3CA;AKT1;HRAS
Mitophagy	0.000754572	21.3478	161.676	HIF1A;HRAS;TP53
Pathways of neurodegeneration	0.00106041	6.23188	45.027	BDNF;CASP3;CTNNB1;PLCG1;TNF;HRAS
Arrhythmogenic right ventricular cardiomyopathy	0.00106862	18.7429	135.131	ITGB1;CTNNB1;ACTB
Hypertrophic cardiomyopathy	0.00166775	15.9318	107.649	ITGB1;TNF;ACTB
Diabetic cardiomyopathy	0.00171429	9.45441	63.5486	PIK3CA;AKT1;GAPDH;INS
TGF-beta signaling pathway	0.00186186	15.2285	100.985	IFNG;MYC;TNF
Dilated cardiomyopathy	0.00196325	14.8995	97.9001	ITGB1;TNF;ACTB
Progesterone-mediated oocyte maturation	0.00219105	14.2822	92.1684	PIK3CA;AKT1;INS
Toll-like receptor signaling pathway	0.00241543	13.7138	86.9586	PIK3CA;AKT1;TNF
NF-kappa B signaling pathway	0.00241543	13.7138	86.9586	LCK;PLCG1;TNF
AMPK signaling pathway	0.00358031	11.8289	70.1851	PIK3CA;AKT1;INS
Endocytosis	0.00358031	7.56759	44.8961	CXCR4;HLA-A;HRAS;EGFR
Aldosterone-regulated sodium reabsorption	0.0043897	25.8688	148.011	PIK3CA;INS
Carbohydrate digestion and absorption	0.00697131	20.1101	105.615	PIK3CA;AKT1
Oxytocin signaling pathway	0.00704781	9.1497	47.8873	HRAS;EGFR;ACTB
Necroptosis	0.00764531	8.8542	45.5572	IFNG;STAT3;TNF
Vibrio cholerae infection	0.00769931	18.8504	96.7242	PLCG1;ACTB
Wnt signaling pathway	0.00849005	8.47097	42.5782	MYC;CTNNB1;TP53
Tight junction	0.00885691	8.31662	41.3926	ITGB1;ERBB2;ACTB
Basal cell carcinoma	0.0117956	14.8234	69.4277	CTNNB1;TP53
Amyotrophic lateral sclerosis	0.012228	5.1836	24.0559	CASP3;TNF;TP53;ACTB
Transcriptional misregulation in cancer	0.0122911	7.29605	33.772	ITGAM;MYC;TP53
p53 signaling pathway	0.0152234	12.7292	56.0254	CASP3;TP53
Inositol phosphate metabolism	0.0152234	12.7292	56.0254	PIK3CA;PLCG1
cAMP signaling pathway	0.0165371	6.4661	27.881	PIK3CA;BDNF;AKT1
Gap junction	0.02141	10.5011	42.4975	HRAS;EGFR
GnRH signaling pathway	0.0235979	9.92158	39.1215	HRAS;EGFR
Parkinson disease	0.0236137	5.58934	21.9988	CASP3;PLCG1;TP53
Staphylococcus aureus infection	0.0242393	9.70723	37.8891	IL10;ITGAM
Phosphatidylinositol signaling system	0.0250405	9.50191	36.7172	PIK3CA;PLCG1
Inflammatory mediator regulation of TRP channels	0.0253616	9.40246	36.1526	PIK3CA;PLCG1
Melanogenesis	0.0266588	9.11616	34.5388	CTNNB1;HRAS
Serotonergic synapse	0.0326234	8.12572	29.094	CASP3;HRAS
Cell cycle	0.0383845	7.38897	25.1947	MYC;TP53
Huntington disease	0.0383845	4.52475	15.4081	BDNF;CASP3;TP53
Apelin signaling pathway	0.045531	6.67306	21.5427	AKT1;HRAS
Spinocerebellar ataxia	0.048892	6.38717	20.1253	PIK3CA;AKT1
Cushing syndrome	0.0561454	5.88265	17.6857	CTNNB1;EGFR
cGMP-PKG signaling pathway	0.0637039	5.45152	15.6677	AKT1;INS
Maturity onset diabetes of the young	0.0651952	17.7147	50.3943	INS
Alcoholism	0.0760279	4.88389	13.1134	BDNF;HRAS
Ferroptosis	0.0998944	11.0633	26.6184	TP53
Thermogenesis	0.109597	3.89802	8.99404	HRAS;ACTB
Proteasome	0.110138	9.8316	22.5781	IFNG
Cocaine addiction	0.116243	9.21574	20.6122	BDNF
Ovarian steroidogenesis	0.120015	8.84622	19.4514	INS
Long-term depression	0.138984	7.49341	15.3335	HRAS
Glycolysis / Gluconeogenesis	0.152236	6.6963	13.0151	GAPDH
Long-term potentiation	0.152236	6.6963	13.0151	HRAS
RIG-I-like receptor signaling pathway	0.157623	6.40419	12.1879	TNF
Gastric acid secretion	0.169044	5.89007	10.7639	ACTB
Complement and coagulation cascades	0.18615	5.25661	9.0698	ITGAM
Insulin secretion	0.187078	5.19451	8.90756	INS
ECM-receptor interaction	0.189943	5.07458	8.59634	ITGB1
Parathyroid hormone synthesis, secretion and action	0.223109	4.20085	6.41676	EGFR
Glucagon signaling pathway	0.223727	4.16101	6.32135	AKT1
Oocyte meiosis	0.261944	3.44201	4.66728	INS
Dopaminergic synapse	0.265712	3.36268	4.49325	AKT1
Adrenergic signaling in cardiomyocytes	0.294569	2.95377	3.62623	AKT1
NOD-like receptor signaling pathway	0.342077	2.44123	2.61876	TNF

## Sheet: Reactome
Term	Adjusted P-value	Odds Ratio	Combined Score	Genes
Immune System Homo sapiens R-HSA-168256	2.083e-17	18.8786	841.919	ITGB1;ITGAM;FGF2;TNF;EGFR;ACTB;INS;CASP3;ERBB2;AKT1;FYN;NCAM1;PLCG1;CD34;HRAS;STAT3;PTPN11;HLA-A;IL2;CD4;PTPRC;IFNG;PIK3CA;LCK;CD8A;CD28;CTNNB1;PTPN6
Developmental Biology Homo sapiens R-HSA-1266738	7.02847e-17	23.0247	982.854	ITGB1;EOMES;STAT3;PTPN11;FGF2;TNF;EGFR;ACTB;IL2;POU5F1;INS;VEGFA;SOX2;PTPRC;ERBB2;AKT1;CTNNB1;FYN;NCAM1;NANOG;PLCG1;HRAS
Signaling by SCF-KIT Homo sapiens R-HSA-1433557	5.54306e-14	30.6618	1091.91	STAT3;PTPN11;FGF2;EGFR;IL2;INS;PIK3CA;LCK;ERBB2;CD28;AKT1;FYN;NCAM1;PTPN6;HRAS
Cytokine Signaling in Immune system Homo sapiens R-HSA-1280215	6.24569e-14	20.6654	721.489	STAT3;PTPN11;HLA-A;FGF2;TNF;EGFR;IL2;CD4;IFNG;PIK3CA;LCK;CASP3;ERBB2;FYN;NCAM1;PTPN6;PLCG1;HRAS
Downstream signal transduction Homo sapiens R-HSA-186763	6.24569e-14	29.1332	1016.7	STAT3;PTPN11;FGF2;EGFR;IL2;INS;PIK3CA;LCK;ERBB2;CD28;AKT1;FYN;NCAM1;PLCG1;HRAS
Signal Transduction Homo sapiens R-HSA-162582	6.24569e-14	12.2675	426.894	ITGB1;CXCR4;FGF2;TNF;HIF1A;EGFR;ACTB;INS;SOX2;CASP3;MYC;ERBB2;AKT1;FYN;NCAM1;PLCG1;HRAS;STAT3;PTPN11;IL2;GFAP;VEGFA;PIK3CA;LCK;CD28;BIRC5;CTNNB1;PTPN6;TP53
Adaptive Immune System Homo sapiens R-HSA-1280218	9.26992e-14	18.195	622.574	ITGB1;PTPN11;HLA-A;FGF2;EGFR;INS;CD4;PTPRC;PIK3CA;LCK;CD8A;ERBB2;CD28;AKT1;FYN;PTPN6;PLCG1;CD34;HRAS
Signalling by NGF Homo sapiens R-HSA-166520	9.26992e-14	23.9877	814.839	STAT3;PTPN11;FGF2;EGFR;IL2;INS;PIK3CA;LCK;CASP3;ERBB2;CD28;AKT1;FYN;NCAM1;PLCG1;HRAS
Signaling by PDGF Homo sapiens R-HSA-186797	9.26992e-14	27.1813	922.349	STAT3;PTPN11;FGF2;EGFR;IL2;INS;PIK3CA;LCK;ERBB2;CD28;AKT1;FYN;NCAM1;PLCG1;HRAS
Diseases of signal transduction Homo sapiens R-HSA-5663202	9.26992e-14	31.4234	1065.03	STAT3;PTPN11;FGF2;EGFR;PIK3CA;LCK;MYC;ERBB2;CD28;AKT1;CTNNB1;FYN;PLCG1;HRAS
NGF signalling via TRKA from the plasma membrane Homo sapiens R-HSA-187037	1.20737e-13	26.4107	885.643	STAT3;PTPN11;FGF2;EGFR;IL2;INS;PIK3CA;LCK;ERBB2;CD28;AKT1;FYN;NCAM1;PLCG1;HRAS
PI5P, PP2A and IER3 Regulate PI3K/AKT Signaling Homo sapiens R-HSA-6811558	1.26459e-13	75.6507	2526.74	PIK3CA;LCK;ERBB2;CD28;AKT1;FYN;PTPN11;FGF2;EGFR;INS
Signaling by the B Cell Receptor (BCR) Homo sapiens R-HSA-983705	1.40838e-13	35.3364	1173.61	PTPN11;FGF2;EGFR;INS;PIK3CA;LCK;ERBB2;CD28;AKT1;FYN;PTPN6;PLCG1;HRAS
Negative regulation of the PI3K/AKT network Homo sapiens R-HSA-199418	2.52025e-13	69.0069	2246.62	PIK3CA;LCK;ERBB2;CD28;AKT1;FYN;PTPN11;FGF2;EGFR;INS
Downstream signaling of activated FGFR2 Homo sapiens R-HSA-5654696	3.28953e-13	27.2764	874.238	PTPN11;FGF2;EGFR;IL2;INS;PIK3CA;LCK;ERBB2;CD28;AKT1;FYN;NCAM1;PLCG1;HRAS
Downstream signaling of activated FGFR4 Homo sapiens R-HSA-5654716	3.28953e-13	27.2764	874.238	PTPN11;FGF2;EGFR;IL2;INS;PIK3CA;LCK;ERBB2;CD28;AKT1;FYN;NCAM1;PLCG1;HRAS
Downstream signaling of activated FGFR3 Homo sapiens R-HSA-5654708	3.28953e-13	27.2764	874.238	PTPN11;FGF2;EGFR;IL2;INS;PIK3CA;LCK;ERBB2;CD28;AKT1;FYN;NCAM1;PLCG1;HRAS
Signaling by ERBB4 Homo sapiens R-HSA-1236394	3.28953e-13	27.1887	870.29	PTPN11;FGF2;EGFR;IL2;INS;GFAP;PIK3CA;LCK;ERBB2;CD28;AKT1;FYN;NCAM1;HRAS
Signaling by FGFR4 Homo sapiens R-HSA-5654743	3.28953e-13	27.0149	862.478	PTPN11;FGF2;EGFR;IL2;INS;PIK3CA;LCK;ERBB2;CD28;AKT1;FYN;NCAM1;PLCG1;HRAS
Downstream signaling of activated FGFR1 Homo sapiens R-HSA-5654687	3.28953e-13	27.0149	862.478	PTPN11;FGF2;EGFR;IL2;INS;PIK3CA;LCK;ERBB2;CD28;AKT1;FYN;NCAM1;PLCG1;HRAS
Signaling by FGFR3 Homo sapiens R-HSA-5654741	3.28953e-13	26.9289	858.615	PTPN11;FGF2;EGFR;IL2;INS;PIK3CA;LCK;ERBB2;CD28;AKT1;FYN;NCAM1;PLCG1;HRAS
Signaling by FGFR1 Homo sapiens R-HSA-5654736	3.55286e-13	26.6739	847.191	PTPN11;FGF2;EGFR;IL2;INS;PIK3CA;LCK;ERBB2;CD28;AKT1;FYN;NCAM1;PLCG1;HRAS
DAP12 signaling Homo sapiens R-HSA-2424491	4.69777e-13	26.0167	817.892	PTPN11;FGF2;EGFR;IL2;INS;PIK3CA;LCK;ERBB2;CD28;AKT1;FYN;NCAM1;PLCG1;HRAS
Cell surface interactions at the vascular wall Homo sapiens R-HSA-202733	4.84917e-13	60.6319	1901.59	ITGB1;ITGAM;PIK3CA;LCK;PECAM1;FYN;PTPN11;PTPN6;PLCG1;HRAS
Signaling by EGFR Homo sapiens R-HSA-177929	6.66004e-13	25.1633	780.184	PTPN11;FGF2;EGFR;IL2;INS;PIK3CA;LCK;ERBB2;CD28;AKT1;FYN;NCAM1;PLCG1;HRAS
DAP12 interactions Homo sapiens R-HSA-2172127	7.46808e-13	24.8665	767.158	PTPN11;FGF2;EGFR;IL2;INS;PIK3CA;LCK;ERBB2;CD28;AKT1;FYN;NCAM1;PLCG1;HRAS
Signaling by FGFR2 Homo sapiens R-HSA-5654738	7.7608e-13	24.7206	760.775	PTPN11;FGF2;EGFR;IL2;INS;PIK3CA;LCK;ERBB2;CD28;AKT1;FYN;NCAM1;PLCG1;HRAS
Signaling by FGFR Homo sapiens R-HSA-190236	9.03627e-13	24.3633	745.184	PTPN11;FGF2;EGFR;IL2;INS;PIK3CA;LCK;ERBB2;CD28;AKT1;FYN;NCAM1;PLCG1;HRAS
Innate Immune System Homo sapiens R-HSA-168249	1.08767e-12	15.6152	474.168	ITGAM;PTPN11;FGF2;EGFR;ACTB;IL2;INS;CD4;PIK3CA;LCK;ERBB2;CD28;AKT1;CTNNB1;FYN;NCAM1;PLCG1;HRAS
PECAM1 interactions Homo sapiens R-HSA-210990	1.5617e-12	498.7	14946.2	LCK;PECAM1;PTPN11;FYN;PTPN6;PLCG1
Signaling by Interleukins Homo sapiens R-HSA-449147	2.08578e-12	22.6574	671.749	STAT3;PTPN11;FGF2;EGFR;IL2;CD4;PIK3CA;LCK;CASP3;ERBB2;FYN;NCAM1;PTPN6;HRAS
Fc epsilon receptor (FCERI) signaling Homo sapiens R-HSA-2454202	2.12256e-12	22.4756	664.02	PTPN11;FGF2;EGFR;IL2;INS;PIK3CA;LCK;ERBB2;CD28;AKT1;FYN;NCAM1;PLCG1;HRAS
PI-3K cascade:FGFR1 Homo sapiens R-HSA-5654689	2.12256e-12	49.2113	1448.14	PIK3CA;LCK;ERBB2;CD28;AKT1;FYN;PTPN11;FGF2;EGFR;INS
PI-3K cascade:FGFR3 Homo sapiens R-HSA-5654710	2.12256e-12	49.2113	1448.14	PIK3CA;LCK;ERBB2;CD28;AKT1;FYN;PTPN11;FGF2;EGFR;INS
PI3K events in ERBB4 signaling Homo sapiens R-HSA-1250342	2.12256e-12	49.2113	1448.14	PIK3CA;LCK;ERBB2;CD28;AKT1;FYN;PTPN11;FGF2;EGFR;INS
PIP3 activates AKT signaling Homo sapiens R-HSA-1257604	2.12256e-12	49.2113	1448.14	PIK3CA;LCK;ERBB2;CD28;AKT1;FYN;PTPN11;FGF2;EGFR;INS
PI-3K cascade:FGFR4 Homo sapiens R-HSA-5654720	2.12256e-12	49.2113	1448.14	PIK3CA;LCK;ERBB2;CD28;AKT1;FYN;PTPN11;FGF2;EGFR;INS
PI-3K cascade:FGFR2 Homo sapiens R-HSA-5654695	2.12256e-12	49.2113	1448.14	PIK3CA;LCK;ERBB2;CD28;AKT1;FYN;PTPN11;FGF2;EGFR;INS
Disease Homo sapiens R-HSA-1643685	2.18368e-12	15.9352	468.06	STAT3;CXCR4;PTPN11;HLA-A;FGF2;EGFR;CD4;PIK3CA;LCK;MYC;ERBB2;CD28;AKT1;CTNNB1;FYN;PLCG1;HRAS
GAB1 signalosome Homo sapiens R-HSA-180292	2.51928e-12	47.9203	1398.3	PIK3CA;LCK;ERBB2;CD28;AKT1;FYN;PTPN11;FGF2;EGFR;INS
PI3K/AKT activation Homo sapiens R-HSA-198203	2.51928e-12	47.9203	1398.3	PIK3CA;LCK;ERBB2;CD28;AKT1;FYN;PTPN11;FGF2;EGFR;INS
PI3K/AKT Signaling in Cancer Homo sapiens R-HSA-2219528	3.65907e-12	62.7915	1807.29	PIK3CA;LCK;ERBB2;CD28;AKT1;FYN;PTPN11;FGF2;EGFR
Downstream signaling events of B Cell Receptor (BCR) Homo sapiens R-HSA-1168372	5.38212e-12	34.3335	974.144	PIK3CA;LCK;ERBB2;CD28;AKT1;FYN;PTPN11;FGF2;HRAS;EGFR;INS
Constitutive Signaling by Aberrant PI3K in Cancer Homo sapiens R-HSA-2219530	1.22337e-11	79.0506	2176.17	PIK3CA;LCK;ERBB2;CD28;FYN;PTPN11;FGF2;EGFR
Role of LAT2/NTAL/LAB on calcium mobilization Homo sapiens R-HSA-2730905	3.1469e-11	36.1879	961.206	PIK3CA;LCK;ERBB2;CD28;AKT1;FYN;PTPN11;FGF2;EGFR;INS
Costimulation by the CD28 family Homo sapiens R-HSA-388841	4.66848e-11	65.4276	1710.62	CD4;PIK3CA;LCK;CD28;AKT1;FYN;PTPN11;PTPN6
VEGFA-VEGFR2 Pathway Homo sapiens R-HSA-4420097	5.66604e-11	22.5126	583.752	PIK3CA;ERBB2;AKT1;CTNNB1;FYN;NCAM1;PLCG1;FGF2;HRAS;EGFR;IL2;VEGFA
Signaling by VEGF Homo sapiens R-HSA-194138	7.40526e-11	21.9337	562.408	PIK3CA;ERBB2;AKT1;CTNNB1;FYN;NCAM1;PLCG1;FGF2;HRAS;EGFR;IL2;VEGFA
Signaling by ERBB2 Homo sapiens R-HSA-1227986	8.89602e-11	94.0702	2392.88	PIK3CA;ERBB2;AKT1;FYN;PLCG1;HRAS;EGFR
Hemostasis Homo sapiens R-HSA-109582	1.30863e-10	15.789	395.216	ITGB1;ITGAM;PTPN11;IL2;VEGFA;PIK3CA;LCK;PECAM1;AKT1;FYN;PTPN6;PLCG1;HRAS;TP53
GPVI-mediated activation cascade Homo sapiens R-HSA-114604	2.8639e-10	77.6789	1882.01	PIK3CA;LCK;AKT1;FYN;PTPN11;PTPN6;IL2
Insulin receptor signalling cascade Homo sapiens R-HSA-74751	3.50373e-10	22.4077	537.94	PIK3CA;ERBB2;AKT1;FYN;NCAM1;PTPN11;FGF2;HRAS;EGFR;IL2;INS
POU5F1 (OCT4), SOX2, NANOG activate genes related to proliferation Homo sapiens R-HSA-2892247	5.98537e-10	304.055	7130.83	SOX2;STAT3;NANOG;FGF2;POU5F1
Axon guidance Homo sapiens R-HSA-422475	7.82545e-10	15.2648	353.41	ITGB1;PTPN11;FGF2;EGFR;ACTB;IL2;VEGFA;PTPRC;ERBB2;FYN;NCAM1;PLCG1;HRAS
Signaling by Insulin receptor Homo sapiens R-HSA-74752	7.82545e-10	20.5899	476.602	PIK3CA;ERBB2;AKT1;FYN;NCAM1;PTPN11;FGF2;HRAS;EGFR;IL2;INS
Interleukin-2 signaling Homo sapiens R-HSA-451927	2.00392e-09	22.6263	502.055	PIK3CA;LCK;ERBB2;FYN;NCAM1;PTPN6;FGF2;HRAS;EGFR;IL2
Interleukin-3, 5 and GM-CSF signaling Homo sapiens R-HSA-512988	2.77258e-09	21.805	476.366	PIK3CA;ERBB2;FYN;NCAM1;PTPN11;PTPN6;FGF2;HRAS;EGFR;IL2
Transcriptional regulation of pluripotent stem cells Homo sapiens R-HSA-452723	4.3567e-09	82.9917	1774.14	SOX2;EOMES;STAT3;NANOG;FGF2;POU5F1
IRS-mediated signalling Homo sapiens R-HSA-112399	6.08693e-09	19.9513	419.493	PIK3CA;ERBB2;AKT1;FYN;NCAM1;PTPN11;FGF2;HRAS;EGFR;IL2
IGF1R signaling cascade Homo sapiens R-HSA-2428924	6.63296e-09	19.6603	410.709	PIK3CA;ERBB2;AKT1;FYN;NCAM1;PTPN11;FGF2;HRAS;EGFR;IL2
Signaling by Type 1 Insulin-like Growth Factor 1 Receptor (IGF1R) Homo sapiens R-HSA-2404192	6.63296e-09	19.6603	410.709	PIK3CA;ERBB2;AKT1;FYN;NCAM1;PTPN11;FGF2;HRAS;EGFR;IL2
IRS-related events triggered by IGF1R Homo sapiens R-HSA-2428928	6.63296e-09	19.6603	410.709	PIK3CA;ERBB2;AKT1;FYN;NCAM1;PTPN11;FGF2;HRAS;EGFR;IL2
CD28 dependent PI3K/Akt signaling Homo sapiens R-HSA-389357	1.01463e-08	143.02	2924.65	PIK3CA;LCK;CD28;AKT1;FYN
Signaling by Leptin Homo sapiens R-HSA-2586552	2.81404e-08	20.499	397.954	ERBB2;STAT3;FYN;NCAM1;PTPN11;FGF2;HRAS;EGFR;IL2
Interleukin receptor SHC signaling Homo sapiens R-HSA-912526	2.97657e-08	20.3232	393.085	PIK3CA;ERBB2;FYN;NCAM1;PTPN6;FGF2;HRAS;EGFR;IL2
VEGFR2 mediated cell proliferation Homo sapiens R-HSA-5218921	3.26032e-08	20.065	385.959	ERBB2;FYN;NCAM1;PLCG1;FGF2;HRAS;EGFR;IL2;VEGFA
The role of Nef in HIV-1 replication and disease pathogenesis Homo sapiens R-HSA-164952	3.52433e-08	105.679	2022.95	CD4;LCK;CD28;FYN;HLA-A
POU5F1 (OCT4), SOX2, NANOG repress genes related to differentiation Homo sapiens R-HSA-2892245	3.6374e-08	316.635	6046.5	EOMES;SOX2;NANOG;POU5F1
Platelet activation, signaling and aggregation Homo sapiens R-HSA-76002	3.71198e-08	19.6489	374.531	PIK3CA;LCK;PECAM1;AKT1;FYN;PTPN11;PTPN6;IL2;VEGFA
Signaling by PTK6 Homo sapiens R-HSA-8848021	6.57917e-08	48.9172	903.72	ERBB2;STAT3;AKT1;HIF1A;HRAS;EGFR
CD28 co-stimulation Homo sapiens R-HSA-389356	7.96315e-08	86.7857	1585.52	PIK3CA;LCK;CD28;AKT1;FYN
MAPK family signaling cascades Homo sapiens R-HSA-5683057	9.70944e-08	17.4065	314.311	MYC;ERBB2;FYN;NCAM1;PTPN11;FGF2;HRAS;EGFR;IL2
Signaling by FGFR1 in disease Homo sapiens R-HSA-5655302	1.62406e-07	73.6179	1290.44	PIK3CA;STAT3;PLCG1;FGF2;HRAS
Signaling by EGFRvIII in Cancer Homo sapiens R-HSA-5637812	2.12576e-07	172.667	2975.51	PIK3CA;PLCG1;HRAS;EGFR
Constitutive Signaling by EGFRvIII Homo sapiens R-HSA-5637810	2.12576e-07	172.667	2975.51	PIK3CA;PLCG1;HRAS;EGFR
FRS-mediated FGFR2 signaling Homo sapiens R-HSA-5654700	3.64064e-07	18.2142	303.134	ERBB2;FYN;NCAM1;PTPN11;FGF2;HRAS;EGFR;IL2
FRS-mediated FGFR4 signaling Homo sapiens R-HSA-5654712	3.64064e-07	18.2142	303.134	ERBB2;FYN;NCAM1;PTPN11;FGF2;HRAS;EGFR;IL2
FRS-mediated FGFR3 signaling Homo sapiens R-HSA-5654706	3.64064e-07	18.2142	303.134	ERBB2;FYN;NCAM1;PTPN11;FGF2;HRAS;EGFR;IL2
FRS-mediated FGFR1 signaling Homo sapiens R-HSA-5654693	3.64064e-07	18.2142	303.134	ERBB2;FYN;NCAM1;PTPN11;FGF2;HRAS;EGFR;IL2
Frs2-mediated activation Homo sapiens R-HSA-170968	4.09292e-07	17.8966	295.526	ERBB2;FYN;NCAM1;PLCG1;FGF2;HRAS;EGFR;IL2
MAPK1/MAPK3 signaling Homo sapiens R-HSA-5684996	4.17409e-07	17.8188	293.672	ERBB2;FYN;NCAM1;PTPN11;FGF2;HRAS;EGFR;IL2
Prolonged ERK activation events Homo sapiens R-HSA-169893	4.25691e-07	17.7418	291.835	ERBB2;FYN;NCAM1;PLCG1;FGF2;HRAS;EGFR;IL2
Constitutive Signaling by Ligand-Responsive EGFR Cancer Variants Homo sapiens R-HSA-1236382	5.29048e-07	126.597	2050.33	PIK3CA;PLCG1;HRAS;EGFR
Signaling by Ligand-Responsive EGFR Variants in Cancer Homo sapiens R-HSA-5637815	5.29048e-07	126.597	2050.33	PIK3CA;PLCG1;HRAS;EGFR
Signaling by EGFR in Cancer Homo sapiens R-HSA-1643713	5.29048e-07	126.597	2050.33	PIK3CA;PLCG1;HRAS;EGFR
Signalling to ERKs Homo sapiens R-HSA-187687	5.71427e-07	16.9358	272.784	ERBB2;FYN;NCAM1;PLCG1;FGF2;HRAS;EGFR;IL2
Nef-mediates down modulation of cell surface receptors by recruiting them to clathrin adapters Homo sapiens R-HSA-164938	7.95459e-07	111.692	1760.78	CD4;LCK;CD28;HLA-A
CTLA4 inhibitory signaling Homo sapiens R-HSA-389513	9.38244e-07	105.481	1641.89	LCK;AKT1;PTPN11;FYN
Signaling by FGFR3 point mutants in cancer Homo sapiens R-HSA-8853338	9.38244e-07	105.481	1641.89	PIK3CA;PLCG1;FGF2;HRAS
Signaling by FGFR3 in disease Homo sapiens R-HSA-5655332	9.38244e-07	105.481	1641.89	PIK3CA;PLCG1;FGF2;HRAS
FCERI mediated MAPK activation Homo sapiens R-HSA-2871796	1.4933e-06	14.7391	222.411	ERBB2;FYN;NCAM1;PLCG1;FGF2;HRAS;EGFR;IL2
Signaling by FGFR in disease Homo sapiens R-HSA-1226099	1.72911e-06	41.8335	624.671	PIK3CA;STAT3;PLCG1;FGF2;HRAS
PD-1 signaling Homo sapiens R-HSA-389948	1.84326e-06	86.2857	1282	CD4;LCK;PTPN11;PTPN6
Cell-Cell communication Homo sapiens R-HSA-1500931	2.74902e-06	23.7948	343.768	ITGB1;PIK3CA;CTNNB1;FYN;PTPN11;PTPN6
GRB2 events in EGFR signaling Homo sapiens R-HSA-179812	5.03027e-06	15.5288	214.159	ERBB2;FYN;NCAM1;FGF2;HRAS;EGFR;IL2
SHC1 events in EGFR signaling Homo sapiens R-HSA-180336	5.03027e-06	15.5288	214.159	ERBB2;FYN;NCAM1;FGF2;HRAS;EGFR;IL2
SOS-mediated signalling Homo sapiens R-HSA-112412	5.03027e-06	15.5288	214.159	ERBB2;FYN;NCAM1;FGF2;HRAS;EGFR;IL2
SHC1 events in ERBB4 signaling Homo sapiens R-HSA-1250347	5.03027e-06	15.5288	214.159	ERBB2;FYN;NCAM1;FGF2;HRAS;EGFR;IL2
RAF/MAP kinase cascade Homo sapiens R-HSA-5673001	5.03027e-06	15.5288	214.159	ERBB2;FYN;NCAM1;FGF2;HRAS;EGFR;IL2
ARMS-mediated activation Homo sapiens R-HSA-170984	5.51949e-06	15.258	208.703	ERBB2;FYN;NCAM1;FGF2;HRAS;EGFR;IL2
Signalling to p38 via RIT and RIN Homo sapiens R-HSA-187706	5.51949e-06	15.258	208.703	ERBB2;FYN;NCAM1;FGF2;HRAS;EGFR;IL2
Signalling to RAS Homo sapiens R-HSA-167044	6.62636e-06	14.8058	199.667	ERBB2;FYN;NCAM1;FGF2;HRAS;EGFR;IL2
Signaling by FGFR4 in disease Homo sapiens R-HSA-5655291	8.75061e-06	173.948	2295.74	PIK3CA;PLCG1;HRAS
Interferon gamma signaling Homo sapiens R-HSA-877300	1.07448e-05	27.5305	357.426	IFNG;NCAM1;PTPN11;PTPN6;HLA-A
NCAM signaling for neurite out-growth Homo sapiens R-HSA-375165	1.08206e-05	13.6486	176.973	ERBB2;FYN;NCAM1;FGF2;HRAS;EGFR;IL2
CD28 dependent Vav1 pathway Homo sapiens R-HSA-389359	1.1319e-05	154.612	1996.32	LCK;CD28;FYN
Signaling by FGFR2 in disease Homo sapiens R-HSA-5655253	1.28529e-05	48.6325	621.295	PIK3CA;PLCG1;FGF2;HRAS
Regulation of IFNG signaling Homo sapiens R-HSA-877312	1.8322e-05	126.488	1569.91	IFNG;PTPN11;PTPN6
Interferon Signaling Homo sapiens R-HSA-913531	2.47279e-05	15.6032	188.836	IFNG;NCAM1;PTPN11;PTPN6;PLCG1;HLA-A
Gastrin-CREB signalling pathway via PKC and MAPK Homo sapiens R-HSA-881907	2.49333e-05	9.69712	117.19	PIK3CA;ERBB2;FYN;NCAM1;FGF2;HRAS;EGFR;IL2
Regulation of KIT signaling Homo sapiens R-HSA-1433559	2.68538e-05	107.018	1282.49	LCK;FYN;PTPN6
PI3K events in ERBB2 signaling Homo sapiens R-HSA-1963642	2.68538e-05	107.018	1282.49	PIK3CA;ERBB2;EGFR
GRB2 events in ERBB2 signaling Homo sapiens R-HSA-1963640	2.68538e-05	107.018	1282.49	ERBB2;HRAS;EGFR
TCR signaling Homo sapiens R-HSA-202403	3.16199e-05	21.4127	252.921	CD4;PTPRC;PIK3CA;LCK;PLCG1
Platelet sensitization by LDL Homo sapiens R-HSA-432142	3.19895e-05	99.3688	1171.69	PECAM1;PTPN11;PTPN6
SHC1 events in ERBB2 signaling Homo sapiens R-HSA-1250196	3.76705e-05	92.7395	1076.77	ERBB2;HRAS;EGFR
Tie2 Signaling Homo sapiens R-HSA-210993	3.76705e-05	92.7395	1076.77	PIK3CA;PTPN11;HRAS
HIV Infection Homo sapiens R-HSA-162906	4.65452e-05	13.7069	156.13	CD4;LCK;CD28;CXCR4;FYN;HLA-A
Host Interactions of HIV factors Homo sapiens R-HSA-162909	4.67641e-05	19.5024	221.888	CD4;LCK;CD28;FYN;HLA-A
Signal transduction by L1 Homo sapiens R-HSA-445144	5.95756e-05	77.2713	859.796	ITGB1;NCAM1;EGFR
Semaphorin interactions Homo sapiens R-HSA-373755	6.78041e-05	30.0695	330.443	ITGB1;PTPRC;ERBB2;FYN
SHC-mediated cascade:FGFR4 Homo sapiens R-HSA-5654719	7.77783e-05	69.5372	754.05	PTPN11;FGF2;HRAS
Phosphorylation of CD3 and TCR zeta chains Homo sapiens R-HSA-202427	8.80249e-05	66.2226	709.371	CD4;PTPRC;LCK
SHC-mediated cascade:FGFR2 Homo sapiens R-HSA-5654699	0.000111803	60.458	632.675	PTPN11;FGF2;HRAS
PI3K Cascade Homo sapiens R-HSA-109704	0.000126096	25.2432	260.923	PIK3CA;AKT1;PTPN11;FGF2
Extracellular matrix organization Homo sapiens R-HSA-1474244	0.000170954	10.6554	106.81	ITGB1;ITGAM;CASP3;PECAM1;NCAM1;FGF2
FGFR1 mutant receptor activation Homo sapiens R-HSA-1839124	0.000187211	49.6495	492.786	PIK3CA;STAT3;FGF2
EPH-Ephrin signaling Homo sapiens R-HSA-2682334	0.000254006	20.7881	199.822	FYN;HRAS;ACTB;VEGFA
Generation of second messenger molecules Homo sapiens R-HSA-202433	0.000266642	43.4346	415.061	CD4;LCK;PLCG1
Binding of TCF/LEF:CTNNB1 to target gene promoters Homo sapiens R-HSA-4411364	0.000400233	181.355	1656.58	MYC;CTNNB1
PTK6 promotes HIF1A stabilization Homo sapiens R-HSA-8857538	0.000400233	181.355	1656.58	HIF1A;EGFR
Netrin-1 signaling Homo sapiens R-HSA-373752	0.000441899	35.6261	320.826	FYN;PTPN11;PLCG1
EPHB-mediated forward signaling Homo sapiens R-HSA-3928662	0.000441899	35.6261	320.826	FYN;HRAS;ACTB
Intrinsic Pathway for Apoptosis Homo sapiens R-HSA-109606	0.000441899	35.6261	320.826	CASP3;AKT1;TP53
Deactivation of the beta-catenin transactivating complex Homo sapiens R-HSA-3769402	0.000441899	35.6261	320.826	SOX2;AKT1;CTNNB1
Infectious disease Homo sapiens R-HSA-5663205	0.000494645	8.60175	76.4285	CD4;LCK;CD28;CXCR4;FYN;HLA-A
Insulin-like Growth Factor-2 mRNA Binding Proteins (IGF2BPs/IMPs/VICKZs) bind RNA Homo sapiens R-HSA-428359	0.000505833	151.121	1337.16	MYC;ACTB
Nef and signal transduction Homo sapiens R-HSA-164944	0.000505833	151.121	1337.16	LCK;FYN
Fcgamma receptor (FCGR) dependent phagocytosis Homo sapiens R-HSA-2029480	0.00057878	16.2874	141.803	PIK3CA;FYN;PLCG1;ACTB
Antigen activates B Cell Receptor (BCR) leading to generation of second messengers Homo sapiens R-HSA-983695	0.000597049	31.5698	273.649	FYN;PTPN6;PLCG1
G beta:gamma signalling through PI3Kgamma Homo sapiens R-HSA-392451	0.000626699	30.8667	265.612	PIK3CA;AKT1;IL2
Nef Mediated CD4 Down-regulation Homo sapiens R-HSA-167590	0.000626699	129.526	1113.72	CD4;LCK
EGFR Transactivation by Gastrin Homo sapiens R-HSA-2179392	0.000626699	129.526	1113.72	HRAS;EGFR
G-protein beta:gamma signalling Homo sapiens R-HSA-397795	0.000740712	28.9331	243.741	PIK3CA;AKT1;IL2
Netrin mediated repulsion signals Homo sapiens R-HSA-418886	0.000760942	113.33	949.331	PTPN11;FYN
Regulation of gene expression by Hypoxia-inducible Factor Homo sapiens R-HSA-1234158	0.000760942	113.33	949.331	HIF1A;VEGFA
Signaling by FGFR3 fusions in cancer Homo sapiens R-HSA-8853334	0.000760942	113.33	949.331	PIK3CA;HRAS
Apoptotic cleavage of cell adhesion proteins Homo sapiens R-HSA-351906	0.000916213	100.732	823.741	CASP3;CTNNB1
Interleukin-6 signaling Homo sapiens R-HSA-1059683	0.000916213	100.732	823.741	STAT3;PTPN11
Signal regulatory protein (SIRP) family interactions Homo sapiens R-HSA-391160	0.00126169	82.4091	645.352	PTPN11;PTPN6
Platelet Adhesion to exposed collagen Homo sapiens R-HSA-75892	0.00126169	82.4091	645.352	ITGB1;FYN
ERBB2 Activates PTK6 Signaling Homo sapiens R-HSA-8847993	0.00126169	82.4091	645.352	ERBB2;EGFR
Downregulation of ERBB2:ERBB3 signaling Homo sapiens R-HSA-1358803	0.00126169	82.4091	645.352	ERBB2;AKT1
Immunoregulatory interactions between a Lymphoid and a non-Lymphoid cell Homo sapiens R-HSA-198933	0.00143237	12.3256	94.676	ITGB1;CD8A;HLA-A;CD34
Early Phase of HIV Life Cycle Homo sapiens R-HSA-162594	0.00143237	75.5379	580.009	CD4;CXCR4
Regulation of TP53 Activity through Association with Co-factors Homo sapiens R-HSA-6804759	0.00143237	75.5379	580.009	AKT1;TP53
TP53 regulates transcription of several additional cell death genes whose specific roles in p53-dependent apoptosis remain uncertain Homo sapiens R-HSA-6803205	0.00143237	75.5379	580.009	BIRC5;TP53
Integrin cell surface interactions Homo sapiens R-HSA-216083	0.00151349	21.6824	165.154	ITGB1;ITGAM;PECAM1
Interferon alpha/beta signaling Homo sapiens R-HSA-909733	0.00157086	21.3478	161.676	PTPN11;PTPN6;HLA-A
Apoptosis Homo sapiens R-HSA-109581	0.00160931	11.8568	89.3991	CASP3;AKT1;CTNNB1;TP53
ERBB2 Regulates Cell Motility Homo sapiens R-HSA-6785631	0.00160931	69.7238	525.491	ERBB2;EGFR
Programmed Cell Death Homo sapiens R-HSA-5357801	0.00170763	11.6355	86.932	CASP3;AKT1;CTNNB1;TP53
Signaling by GPCR Homo sapiens R-HSA-372790	0.00175877	4.04239	30.0576	PIK3CA;ERBB2;CXCR4;AKT1;FYN;NCAM1;FGF2;HRAS;EGFR;IL2
Regulation of signaling by CBL Homo sapiens R-HSA-912631	0.00226439	56.642	405.821	PIK3CA;FYN
SHC-mediated cascade:FGFR3 Homo sapiens R-HSA-5654704	0.00226439	56.642	405.821	FGF2;HRAS
Signaling by cytosolic FGFR1 fusion mutants Homo sapiens R-HSA-1839117	0.00226439	56.642	405.821	PIK3CA;STAT3
Other semaphorin interactions Homo sapiens R-HSA-416700	0.00251196	53.3075	376.079	ITGB1;PTPRC
Syndecan interactions Homo sapiens R-HSA-3000170	0.002754	50.3434	349.938	ITGB1;FGF2
Regulation of gene expression in beta cells Homo sapiens R-HSA-210745	0.002754	50.3434	349.938	AKT1;INS
Platelet homeostasis Homo sapiens R-HSA-418346	0.00296917	16.5033	113.128	PECAM1;PTPN11;PTPN6
CD209 (DC-SIGN) signaling Homo sapiens R-HSA-5621575	0.00296917	47.6914	326.8	FYN;HRAS
Translocation of ZAP-70 to Immunological synapse Homo sapiens R-HSA-202430	0.00296917	47.6914	326.8	CD4;LCK
SHC-mediated cascade:FGFR1 Homo sapiens R-HSA-5654688	0.00296917	47.6914	326.8	FGF2;HRAS
TCF dependent signaling in response to WNT Homo sapiens R-HSA-201681	0.00312616	9.65031	65.5748	SOX2;MYC;AKT1;CTNNB1
Nephrin interactions Homo sapiens R-HSA-373753	0.00322404	45.3045	306.193	PIK3CA;FYN
Regulation of TP53 Activity through Acetylation Homo sapiens R-HSA-6804758	0.0035059	43.145	287.736	AKT1;TP53
Chaperonin-mediated protein folding Homo sapiens R-HSA-390466	0.00373207	15.0622	99.4233	STAT3;TP53;ACTB
Growth hormone receptor signaling Homo sapiens R-HSA-982772	0.00377611	41.1818	271.12	STAT3;PTPN6
L1CAM interactions Homo sapiens R-HSA-373760	0.00380331	14.8995	97.9001	ITGB1;NCAM1;EGFR
Regulation of IFNA signaling Homo sapiens R-HSA-912694	0.00405293	39.3893	256.092	PTPN11;PTPN6
Downstream TCR signaling Homo sapiens R-HSA-202424	0.0041092	14.4317	93.5496	CD4;PIK3CA;LCK
Protein folding Homo sapiens R-HSA-391251	0.00428895	14.1357	90.8197	STAT3;TP53;ACTB
Regulation of Hypoxia-inducible Factor (HIF) by oxygen Homo sapiens R-HSA-1234174	0.00428895	37.7462	242.443	HIF1A;VEGFA
Cellular response to hypoxia Homo sapiens R-HSA-2262749	0.00428895	37.7462	242.443	HIF1A;VEGFA
VEGFR2 mediated vascular permeability Homo sapiens R-HSA-5218920	0.00457556	36.2345	229.998	AKT1;CTNNB1
Interleukin-6 family signaling Homo sapiens R-HSA-6783589	0.00457556	36.2345	229.998	STAT3;PTPN11
Activation of BH3-only proteins Homo sapiens R-HSA-114452	0.00522094	33.5471	208.155	AKT1;TP53
Negative regulation of FGFR3 signaling Homo sapiens R-HSA-5654732	0.00522094	33.5471	208.155	PTPN11;FGF2
RHO GTPases Activate Formins Homo sapiens R-HSA-5663220	0.00588987	12.472	75.8173	ITGB1;BIRC5;ACTB
Negative regulation of FGFR4 signaling Homo sapiens R-HSA-5654733	0.00589943	31.2304	189.634	PTPN11;FGF2
Regulation of beta-cell development Homo sapiens R-HSA-186712	0.00621809	30.1879	181.399	AKT1;INS
Negative regulation of FGFR1 signaling Homo sapiens R-HSA-5654726	0.00621809	30.1879	181.399	PTPN11;FGF2
RHO GTPase Effectors Homo sapiens R-HSA-195258	0.00684959	7.476	44.0341	ITGB1;BIRC5;CTNNB1;ACTB
EPHA-mediated growth cone collapse Homo sapiens R-HSA-3928663	0.00684959	28.2983	166.643	FYN;VEGFA
EGFR interacts with phospholipase C-gamma Homo sapiens R-HSA-212718	0.00684959	28.2983	166.643	PLCG1;EGFR
Negative regulation of FGFR2 signaling Homo sapiens R-HSA-5654727	0.00684959	28.2983	166.643	PTPN11;FGF2
Signaling by NOTCH Homo sapiens R-HSA-157118	0.00684959	11.6289	68.4543	MYC;HIF1A;TP53
Regulation of TP53 Degradation Homo sapiens R-HSA-6804757	0.00720153	27.4394	160.01	AKT1;TP53
Regulation of TP53 Expression and Degradation Homo sapiens R-HSA-6806003	0.00757576	26.631	153.813	AKT1;TP53
Apoptotic cleavage of cellular proteins Homo sapiens R-HSA-111465	0.00795699	25.8688	148.011	CASP3;CTNNB1
Association of TriC/CCT with target proteins during biosynthesis Homo sapiens R-HSA-390471	0.00873984	24.4681	137.457	STAT3;TP53
Nuclear signaling by ERBB4 Homo sapiens R-HSA-1251985	0.00873984	24.4681	137.457	PTPN11;GFAP
Non-integrin membrane-ECM interactions Homo sapiens R-HSA-3000171	0.010061	22.6295	123.831	ITGB1;FGF2
TP53 Regulates Transcription of Cell Death Genes Homo sapiens R-HSA-5633008	0.0104848	22.0765	119.785	BIRC5;TP53
Phospholipase C-mediated cascade; FGFR3 Homo sapiens R-HSA-5654227	0.0109145	21.5498	115.956	PLCG1;FGF2
Signaling by Wnt Homo sapiens R-HSA-195721	0.010973	6.43528	34.5617	SOX2;MYC;AKT1;CTNNB1
Phospholipase C-mediated cascade; FGFR4 Homo sapiens R-HSA-5654228	0.0117916	20.5682	108.885	PLCG1;FGF2
Phospholipase C-mediated cascade: FGFR1 Homo sapiens R-HSA-5654219	0.01218	20.1101	105.615	PLCG1;FGF2
NOTCH1 Intracellular Domain Regulates Transcription Homo sapiens R-HSA-2122947	0.01218	20.1101	105.615	MYC;HIF1A
Phospholipase C-mediated cascade; FGFR2 Homo sapiens R-HSA-5654221	0.0131489	19.2524	99.545	PLCG1;FGF2
Apoptotic execution phase Homo sapiens R-HSA-75153	0.014147	18.4647	94.0337	CASP3;CTNNB1
ECM proteoglycans Homo sapiens R-HSA-3000178	0.0163041	17.0678	84.4165	ITGB1;NCAM1
Formation of the beta-catenin:TCF transactivating complex Homo sapiens R-HSA-201722	0.0179846	16.151	78.2217	MYC;CTNNB1
Role of phospholipids in phagocytosis Homo sapiens R-HSA-2029485	0.0191119	15.5925	74.4958	PIK3CA;PLCG1
Cellular responses to stress Homo sapiens R-HSA-2262752	0.0223291	5.13997	23.7096	STAT3;HIF1A;TP53;VEGFA
Signaling by Rho GTPases Homo sapiens R-HSA-194315	0.0223291	5.13997	23.7096	ITGB1;BIRC5;CTNNB1;ACTB
SMAC binds to IAPs Homo sapiens R-HSA-111463	0.0246188	110.833	495.416	CASP3
SMAC-mediated dissociation of IAP:caspase complexes Homo sapiens R-HSA-111464	0.0246188	110.833	495.416	CASP3
SMAC-mediated apoptotic response Homo sapiens R-HSA-111469	0.0246188	110.833	495.416	CASP3
Cytochrome c-mediated apoptotic response Homo sapiens R-HSA-111461	0.0246188	110.833	495.416	CASP3
Activation of caspases through apoptosome-mediated cleavage Homo sapiens R-HSA-111459	0.0246188	110.833	495.416	CASP3
IRS activation Homo sapiens R-HSA-74713	0.0246188	110.833	495.416	INS
PTK6 Expression Homo sapiens R-HSA-8849473	0.0246188	110.833	495.416	HIF1A
GRB7 events in ERBB2 signaling Homo sapiens R-HSA-1306955	0.0246188	110.833	495.416	ERBB2
Activation of RAS in B cells Homo sapiens R-HSA-1169092	0.0246188	110.833	495.416	HRAS
LRR FLII-interacting protein 1 (LRRFIP1) activates type I IFN production Homo sapiens R-HSA-3134973	0.0246188	110.833	495.416	CTNNB1
Signaling by NOTCH1 Homo sapiens R-HSA-1980143	0.0255683	12.9117	57.1686	MYC;HIF1A
Fibronectin matrix formation Homo sapiens R-HSA-1566977	0.0288707	88.6622	380.247	ITGB1
NADE modulates death signalling Homo sapiens R-HSA-205025	0.0288707	88.6622	380.247	CASP3
FGFR1b ligand binding and activation Homo sapiens R-HSA-190370	0.0288707	88.6622	380.247	FGF2
TNFR1-mediated ceramide production Homo sapiens R-HSA-5626978	0.0288707	88.6622	380.247	TNF
Peptide hormone metabolism Homo sapiens R-HSA-2980736	0.0313004	11.4356	48.0704	CTNNB1;INS
Apoptotic factor-mediated response Homo sapiens R-HSA-111471	0.0332442	73.8815	305.551	CASP3
TP53 Regulates Metabolic Genes Homo sapiens R-HSA-5628897	0.0332442	11.0155	45.5466	AKT1;TP53
Cell junction organization Homo sapiens R-HSA-446728	0.034607	10.7522	43.9798	ITGB1;CTNNB1
VEGF ligand-receptor interactions Homo sapiens R-HSA-194313	0.0372782	63.3238	253.503	VEGFA
VEGF binds to VEGFR leading to receptor dimerization Homo sapiens R-HSA-195399	0.0372782	63.3238	253.503	VEGFA
Activation of PUMA and translocation to mitochondria Homo sapiens R-HSA-139915	0.0372782	63.3238	253.503	TP53
CHL1 interactions Homo sapiens R-HSA-447041	0.0408182	55.4056	215.341	ITGB1
Alpha-defensins Homo sapiens R-HSA-1462054	0.0408182	55.4056	215.341	CD4
AKT phosphorylates targets in the nucleus Homo sapiens R-HSA-198693	0.0408182	55.4056	215.341	AKT1
MAPK1 (ERK2) activation Homo sapiens R-HSA-112411	0.0408182	55.4056	215.341	PTPN11
PTK6 Regulates RTKs and Their Effectors AKT1 and DOK1 Homo sapiens R-HSA-8849469	0.0408182	55.4056	215.341	AKT1
SHC-related events triggered by IGF1R Homo sapiens R-HSA-2428933	0.0408182	55.4056	215.341	HRAS
SUMO E3 ligases SUMOylate target proteins Homo sapiens R-HSA-3108232	0.0408182	9.60348	37.2959	BIRC5;TP53
SUMOylation Homo sapiens R-HSA-2990846	0.0432242	9.11616	34.5388	BIRC5;TP53
Role of second messengers in netrin-1 signaling Homo sapiens R-HSA-418890	0.0432242	49.2469	186.271	PLCG1
Dectin-2 family Homo sapiens R-HSA-5621480	0.0432242	49.2469	186.271	FYN
Folding of actin by CCT/TriC Homo sapiens R-HSA-390450	0.0432242	49.2469	186.271	ACTB
Nef mediated downregulation of MHC class I complex cell surface expression Homo sapiens R-HSA-164940	0.0432242	49.2469	186.271	HLA-A
eNOS activation Homo sapiens R-HSA-203615	0.0432242	49.2469	186.271	AKT1
Tetrahydrobiopterin (BH4) synthesis, recycling, salvage and regulation Homo sapiens R-HSA-1474151	0.0432242	49.2469	186.271	AKT1
Ligand-independent caspase activation via DCC Homo sapiens R-HSA-418889	0.0432242	49.2469	186.271	CASP3
Signal attenuation Homo sapiens R-HSA-74749	0.0432242	49.2469	186.271	INS
MAPK3 (ERK1) activation Homo sapiens R-HSA-110056	0.0432242	49.2469	186.271	PTPN11
FGFR2b ligand binding and activation Homo sapiens R-HSA-190377	0.0432242	49.2469	186.271	FGF2
Platelet degranulation Homo sapiens R-HSA-114608	0.0459898	8.76037	32.5576	PECAM1;VEGFA
RHO GTPases activate IQGAPs Homo sapiens R-HSA-5626467	0.0467627	44.32	163.461	CTNNB1
FGFR1c ligand binding and activation Homo sapiens R-HSA-190373	0.0467627	44.32	163.461	FGF2
Signaling by activated point mutants of FGFR1 Homo sapiens R-HSA-1839122	0.0467627	44.32	163.461	FGF2
Response to elevated platelet cytosolic Ca2+ Homo sapiens R-HSA-76005	0.0493644	8.35269	30.3221	PECAM1;VEGFA
Endosomal/Vacuolar pathway Homo sapiens R-HSA-1236977	0.0496207	40.2889	145.133	HLA-A
Caspase-mediated cleavage of cytoskeletal proteins Homo sapiens R-HSA-264870	0.0496207	40.2889	145.133	CASP3
TP53 Regulates Transcription of Caspase Activators and Caspases Homo sapiens R-HSA-6803207	0.0496207	40.2889	145.133	TP53
TP53 Regulates Transcription of Death Receptors and Ligands Homo sapiens R-HSA-6803211	0.0496207	40.2889	145.133	TP53
FGFR3 mutant receptor activation Homo sapiens R-HSA-2033514	0.0496207	40.2889	145.133	FGF2
Signaling by activated point mutants of FGFR3 Homo sapiens R-HSA-1839130	0.0496207	40.2889	145.133	FGF2
TP53 Regulates Transcription of Genes Involved in G1 Cell Cycle Arrest Homo sapiens R-HSA-6804116	0.051757	36.9296	130.117	TP53
AKT phosphorylates targets in the cytosol Homo sapiens R-HSA-198323	0.051757	36.9296	130.117	AKT1
Activation of DNA fragmentation factor Homo sapiens R-HSA-211227	0.051757	36.9296	130.117	CASP3
Apoptosis induced DNA fragmentation Homo sapiens R-HSA-140342	0.051757	36.9296	130.117	CASP3
FGFRL1 modulation of FGFR1 signaling Homo sapiens R-HSA-5658623	0.051757	36.9296	130.117	FGF2
FGFR2c ligand binding and activation Homo sapiens R-HSA-190375	0.051757	36.9296	130.117	FGF2
FGFR3c ligand binding and activation Homo sapiens R-HSA-190372	0.051757	36.9296	130.117	FGF2
FGFR3 ligand binding and activation Homo sapiens R-HSA-190239	0.051757	36.9296	130.117	FGF2
p38MAPK events Homo sapiens R-HSA-171007	0.051757	36.9296	130.117	HRAS
TNFR1-induced proapoptotic signaling Homo sapiens R-HSA-5357786	0.051757	36.9296	130.117	TNF
DCC mediated attractive signaling Homo sapiens R-HSA-418885	0.0546888	34.0872	117.614	FYN
SEMA3A-Plexin repulsion signaling by inhibiting Integrin adhesion Homo sapiens R-HSA-399955	0.0546888	34.0872	117.614	FYN
Repression of WNT target genes Homo sapiens R-HSA-4641265	0.0546888	34.0872	117.614	CTNNB1
SUMOylation of transcription factors Homo sapiens R-HSA-3232118	0.0546888	34.0872	117.614	TP53
FGFR4 ligand binding and activation Homo sapiens R-HSA-190322	0.0546888	34.0872	117.614	FGF2
Toll Like Receptor 4 (TLR4) Cascade Homo sapiens R-HSA-166016	0.0550903	7.51288	25.8409	ITGAM;PTPN11
C-type lectin receptors (CLRs) Homo sapiens R-HSA-5621481	0.0557233	7.45041	25.5146	FYN;HRAS
Activation of BAD and translocation to mitochondria Homo sapiens R-HSA-111447	0.0563321	31.6508	107.06	AKT1
Prolactin receptor signaling Homo sapiens R-HSA-1170546	0.0563321	31.6508	107.06	PTPN11
S33 mutants of beta-catenin aren't phosphorylated Homo sapiens R-HSA-5358747	0.0563321	31.6508	107.06	CTNNB1
S45 mutants of beta-catenin aren't phosphorylated Homo sapiens R-HSA-5358751	0.0563321	31.6508	107.06	CTNNB1
phosphorylation site mutants of CTNNB1 are not targeted to the proteasome by the destruction complex Homo sapiens R-HSA-4839743	0.0563321	31.6508	107.06	CTNNB1
T41 mutants of beta-catenin aren't phosphorylated Homo sapiens R-HSA-5358752	0.0563321	31.6508	107.06	CTNNB1
S37 mutants of beta-catenin aren't phosphorylated Homo sapiens R-HSA-5358749	0.0563321	31.6508	107.06	CTNNB1
Misspliced GSK3beta mutants stabilize beta-catenin Homo sapiens R-HSA-5339716	0.0563321	31.6508	107.06	CTNNB1
FGFR1 ligand binding and activation Homo sapiens R-HSA-190242	0.0563321	31.6508	107.06	FGF2
Metabolism of proteins Homo sapiens R-HSA-392499	0.0585268	2.65253	8.86183	STAT3;BIRC5;CTNNB1;TP53;ACTB;INS
Cell-extracellular matrix interactions Homo sapiens R-HSA-446353	0.0590133	29.5393	98.044	ITGB1
CRMPs in Sema3A signaling Homo sapiens R-HSA-399956	0.0590133	29.5393	98.044	FYN
Sema3A PAK dependent Axon repulsion Homo sapiens R-HSA-399954	0.0590133	29.5393	98.044	FYN
Spry regulation of FGF signaling Homo sapiens R-HSA-1295596	0.0590133	29.5393	98.044	PTPN11
Synthesis, secretion, and deacylation of Ghrelin Homo sapiens R-HSA-422085	0.061194	27.6917	90.2638	INS
Ras activation uopn Ca2+ infux through NMDA receptor Homo sapiens R-HSA-442982	0.061194	27.6917	90.2638	HRAS
KSRP (KHSRP) binds and destabilizes mRNA Homo sapiens R-HSA-450604	0.061194	27.6917	90.2638	AKT1
Butyrate Response Factor 1 (BRF1) binds and destabilizes mRNA Homo sapiens R-HSA-450385	0.061194	27.6917	90.2638	AKT1
Formation of Senescence-Associated Heterochromatin Foci (SAHF) Homo sapiens R-HSA-2559584	0.061194	27.6917	90.2638	TP53
Beta-catenin phosphorylation cascade Homo sapiens R-HSA-196299	0.061194	27.6917	90.2638	CTNNB1
Activated point mutants of FGFR2 Homo sapiens R-HSA-2033519	0.061194	27.6917	90.2638	FGF2
CD22 mediated BCR regulation Homo sapiens R-HSA-5690714	0.0638833	26.0614	83.4895	PTPN6
TP53 Regulates Transcription of Genes Involved in G2 Cell Cycle Arrest Homo sapiens R-HSA-6804114	0.0638833	26.0614	83.4895	TP53
Oxygen-dependent proline hydroxylation of Hypoxia-inducible Factor Alpha Homo sapiens R-HSA-1234176	0.0638833	26.0614	83.4895	HIF1A
Activation of IRF3/IRF7 mediated by TBK1/IKK epsilon Homo sapiens R-HSA-936964	0.0638833	26.0614	83.4895	PTPN11
Toll-Like Receptors Cascades Homo sapiens R-HSA-168898	0.0646021	6.52701	20.8156	ITGAM;PTPN11
HIV Life Cycle Homo sapiens R-HSA-162587	0.0652271	6.47973	20.5815	CD4;CXCR4
Ephrin signaling Homo sapiens R-HSA-3928664	0.066074	24.6123	77.544	FYN
TP53 Regulates Transcription of Genes Involved in Cytochrome C Release Homo sapiens R-HSA-6803204	0.066074	24.6123	77.544	TP53
Signaling by FGFR2 IIIa TM Homo sapiens R-HSA-8851708	0.066074	24.6123	77.544	FGF2
Regulation of TP53 Activity through Methylation Homo sapiens R-HSA-6804760	0.066074	24.6123	77.544	TP53
Synthesis, secretion, and inactivation of Glucagon-like Peptide-1 (GLP-1) Homo sapiens R-HSA-381771	0.0683883	23.3158	72.2892	CTNNB1
eNOS activation and regulation Homo sapiens R-HSA-203765	0.0683883	23.3158	72.2892	AKT1
Metabolism of nitric oxide Homo sapiens R-HSA-202131	0.0683883	23.3158	72.2892	AKT1
Signaling by Hippo Homo sapiens R-HSA-2028269	0.0683883	23.3158	72.2892	CASP3
FGFR2 ligand binding and activation Homo sapiens R-HSA-190241	0.0683883	23.3158	72.2892	FGF2
Transcriptional Regulation by TP53 Homo sapiens R-HSA-3700989	0.0692821	3.96542	12.2307	AKT1;BIRC5;TP53
Regulation of TP53 Activity Homo sapiens R-HSA-5633007	0.0710613	6.04179	18.4465	AKT1;TP53
TP53 regulates transcription of additional cell cycle genes whose exact role in the p53 pathway remain uncertain Homo sapiens R-HSA-6804115	0.0710613	22.1489	67.6154	TP53
Incretin synthesis, secretion, and inactivation Homo sapiens R-HSA-400508	0.0769406	20.1333	59.6759	CTNNB1
Laminin interactions Homo sapiens R-HSA-3000157	0.0769406	20.1333	59.6759	ITGB1
RAF-independent MAPK1/3 activation Homo sapiens R-HSA-112409	0.0769406	20.1333	59.6759	PTPN11
Cellular Senescence Homo sapiens R-HSA-2559583	0.0786644	5.65895	16.6306	STAT3;TP53
Sema4D induced cell migration and growth-cone collapse Homo sapiens R-HSA-416572	0.0794649	19.257	56.2803	ERBB2
Insulin processing Homo sapiens R-HSA-264876	0.0794649	19.257	56.2803	INS
Basigin interactions Homo sapiens R-HSA-210991	0.0814458	18.4537	53.1999	ITGB1
Synthesis of IP3 and IP4 in the cytosol Homo sapiens R-HSA-1855204	0.0814458	18.4537	53.1999	PLCG1
Antigen Presentation: Folding, assembly and peptide loading of class I MHC Homo sapiens R-HSA-983170	0.0814458	18.4537	53.1999	HLA-A
Constitutive Signaling by AKT1 E17K in Cancer Homo sapiens R-HSA-5674400	0.0814458	18.4537	53.1999	AKT1
RAF activation Homo sapiens R-HSA-5673000	0.0814458	18.4537	53.1999	HRAS
Insulin receptor recycling Homo sapiens R-HSA-77387	0.083856	17.7147	50.3943	INS
PTK6 Regulates RHO GTPases, RAS GTPase and MAP kinases Homo sapiens R-HSA-8849471	0.083856	17.7147	50.3943	HRAS
TNFR1-induced NFkappaB signaling pathway Homo sapiens R-HSA-5357956	0.083856	17.7147	50.3943	TNF
Integrin alphaIIb beta3 signaling Homo sapiens R-HSA-354192	0.0854625	17.0325	47.8299	AKT1
Sema4D in semaphorin signaling Homo sapiens R-HSA-400685	0.0854625	17.0325	47.8299	ERBB2
Prefoldin mediated transfer of substrate to CCT/TriC Homo sapiens R-HSA-389957	0.0854625	17.0325	47.8299	ACTB
CREB phosphorylation through the activation of Ras Homo sapiens R-HSA-442742	0.0854625	17.0325	47.8299	HRAS
EGFR downregulation Homo sapiens R-HSA-182971	0.0854625	17.0325	47.8299	EGFR
Caspase activation via extrinsic apoptotic signalig pathway Homo sapiens R-HSA-5357769	0.0854625	17.0325	47.8299	CASP3
Myogenesis Homo sapiens R-HSA-525793	0.0910575	15.8143	43.3142	CTNNB1
CDO in myogenesis Homo sapiens R-HSA-375170	0.0910575	15.8143	43.3142	CTNNB1
Molecules associated with elastic fibres Homo sapiens R-HSA-2129379	0.0938206	15.2682	41.3179	ITGB1
Adherens junctions interactions Homo sapiens R-HSA-418990	0.0960075	14.7585	39.4712	CTNNB1
Disassembly of the destruction complex and recruitment of AXIN to the membrane Homo sapiens R-HSA-4641262	0.0960075	14.7585	39.4712	CTNNB1
Regulation of TNFR1 signaling Homo sapiens R-HSA-5357905	0.0960075	14.7585	39.4712	TNF
Cooperation of Prefoldin and TriC/CCT in actin and tubulin folding Homo sapiens R-HSA-389958	0.097321	14.2817	37.7585	ACTB
DAG and IP3 signaling Homo sapiens R-HSA-1489509	0.097321	14.2817	37.7585	PLCG1
Oncogene Induced Senescence Homo sapiens R-HSA-2559585	0.097321	14.2817	37.7585	TP53
SMAD2/SMAD3:SMAD4 heterotrimer regulates transcription Homo sapiens R-HSA-2173796	0.097321	14.2817	37.7585	MYC
Gluconeogenesis Homo sapiens R-HSA-70263	0.097321	14.2817	37.7585	GAPDH
Glycolysis Homo sapiens R-HSA-70171	0.097321	14.2817	37.7585	GAPDH
FGFR2 mutant receptor activation Homo sapiens R-HSA-1839126	0.099969	13.8347	36.1664	FGF2
PLC-gamma1 signalling Homo sapiens R-HSA-167021	0.102024	13.4148	34.6831	PLCG1
Synthesis of PIPs at the plasma membrane Homo sapiens R-HSA-1660499	0.102024	13.4148	34.6831	PIK3CA
Signaling by WNT in cancer Homo sapiens R-HSA-4791275	0.102024	13.4148	34.6831	CTNNB1
Post NMDA receptor activation events Homo sapiens R-HSA-438064	0.104616	13.0196	33.2984	HRAS
RHO GTPases Activate WASPs and WAVEs Homo sapiens R-HSA-5663213	0.107188	12.647	32.0032	ACTB
Platelet Aggregation (Plug Formation) Homo sapiens R-HSA-76009	0.109437	12.2951	30.7895	AKT1
NCAM1 interactions Homo sapiens R-HSA-419037	0.109437	12.2951	30.7895	NCAM1
MAP2K and MAPK activation Homo sapiens R-HSA-5674135	0.111655	11.9622	29.6501	HRAS
DNA Damage Recognition in GG-NER Homo sapiens R-HSA-5696394	0.111655	11.9622	29.6501	ACTB
Activation of NMDA receptor upon glutamate binding and postsynaptic events Homo sapiens R-HSA-442755	0.113842	11.6468	28.5788	HRAS
mTOR signalling Homo sapiens R-HSA-165159	0.113842	11.6468	28.5788	AKT1
PKB-mediated events Homo sapiens R-HSA-109703	0.115999	11.3476	27.5699	AKT1
Negative regulation of MAPK pathway Homo sapiens R-HSA-5675221	0.115999	11.3476	27.5699	HRAS
Cell Cycle, Mitotic Homo sapiens R-HSA-69278	0.117493	2.96322	7.14203	MYC;BIRC5;TP53
Elastic fibre formation Homo sapiens R-HSA-1566948	0.117493	11.0633	26.6184	ITGB1
Pre-NOTCH Transcription and Translation Homo sapiens R-HSA-1912408	0.117493	11.0633	26.6184	TP53
TNF signaling Homo sapiens R-HSA-75893	0.117493	11.0633	26.6184	TNF
BMAL1:CLOCK,NPAS2 activates circadian gene expression Homo sapiens R-HSA-1368108	0.119904	10.793	25.7198	HIF1A
Inositol phosphate metabolism Homo sapiens R-HSA-1483249	0.124338	10.2899	24.0652	PLCG1
SUMOylation of DNA replication proteins Homo sapiens R-HSA-4615885	0.124338	10.2899	24.0652	BIRC5
Transcriptional activity of SMAD2/SMAD3:SMAD4 heterotrimer Homo sapiens R-HSA-2173793	0.124338	10.2899	24.0652	MYC
Defensins Homo sapiens R-HSA-1461973	0.132024	9.61739	21.89	CD4
EPH-ephrin mediated repulsion of cells Homo sapiens R-HSA-3928665	0.133624	9.41229	21.2354	FYN
TP53 Regulates Transcription of Cell Cycle Genes Homo sapiens R-HSA-6791312	0.133624	9.41229	21.2354	TP53
Death Receptor Signalling Homo sapiens R-HSA-73887	0.133624	9.41229	21.2354	TNF
FCGR activation Homo sapiens R-HSA-2029481	0.1359	9.21574	20.6122	FYN
Vpu mediated degradation of CD4 Homo sapiens R-HSA-180534	0.140399	8.84622	19.4514	CD4
Autodegradation of the E3 ubiquitin ligase COP1 Homo sapiens R-HSA-349425	0.140399	8.84622	19.4514	TP53
Generic Transcription Pathway Homo sapiens R-HSA-212436	0.145913	2.25672	4.86935	MYC;AKT1;BIRC5;TP53
Stabilization of p53 Homo sapiens R-HSA-69541	0.147397	8.34423	17.8983	TP53
Post-translational protein modification Homo sapiens R-HSA-597592	0.147702	2.61776	5.6029	BIRC5;TP53;INS
Chemokine receptors bind chemokines Homo sapiens R-HSA-380108	0.151733	8.04	16.9711	CXCR4
Constitutive Signaling by NOTCH1 HD+PEST Domain Mutants Homo sapiens R-HSA-2894862	0.151923	7.89603	16.5362	MYC
Signaling by NOTCH1 in Cancer Homo sapiens R-HSA-2644603	0.151923	7.89603	16.5362	MYC
Signaling by NOTCH1 PEST Domain Mutants in Cancer Homo sapiens R-HSA-2644602	0.151923	7.89603	16.5362	MYC
Constitutive Signaling by NOTCH1 PEST Domain Mutants Homo sapiens R-HSA-2644606	0.151923	7.89603	16.5362	MYC
Signaling by NOTCH1 HD+PEST Domain Mutants in Cancer Homo sapiens R-HSA-2894858	0.151923	7.89603	16.5362	MYC
Pre-NOTCH Expression and Processing Homo sapiens R-HSA-1912422	0.151923	7.89603	16.5362	TP53
B-WICH complex positively regulates rRNA expression Homo sapiens R-HSA-5250924	0.153638	7.75712	16.1189	ACTB
Recruitment and ATM-mediated phosphorylation of repair and signaling proteins at DNA double strand breaks Homo sapiens R-HSA-5693565	0.153638	7.75712	16.1189	TP53
DNA Damage/Telomere Stress Induced Senescence Homo sapiens R-HSA-2559586	0.15494	7.62299	15.7183	TP53
DNA Double Strand Break Response Homo sapiens R-HSA-5693606	0.15494	7.62299	15.7183	TP53
The role of GTSE1 in G2/M progression after G2 checkpoint Homo sapiens R-HSA-8852276	0.15494	7.62299	15.7183	TP53
PI Metabolism Homo sapiens R-HSA-1483255	0.156608	7.49341	15.3335	PIK3CA
Translocation of GLUT4 to the plasma membrane Homo sapiens R-HSA-1445148	0.156608	7.49341	15.3335	AKT1
Cell-cell junction organization Homo sapiens R-HSA-421270	0.157471	7.36815	14.9635	CTNNB1
Ca2+ pathway Homo sapiens R-HSA-4086398	0.157471	7.36815	14.9635	CTNNB1
Cell death signalling via NRAGE, NRIF and NADE Homo sapiens R-HSA-204998	0.157471	7.36815	14.9635	CASP3
TP53 Regulates Transcription of DNA Repair Genes Homo sapiens R-HSA-6796648	0.157471	7.36815	14.9635	TP53
FCERI mediated Ca+2 mobilization Homo sapiens R-HSA-2871809	0.159483	7.24699	14.6076	PLCG1
Circadian Clock Homo sapiens R-HSA-400253	0.160689	7.12975	14.265	HIF1A
p53-Dependent G1/S DNA damage checkpoint Homo sapiens R-HSA-69580	0.160689	7.12975	14.265	TP53
p53-Dependent G1 DNA Damage Response Homo sapiens R-HSA-69563	0.160689	7.12975	14.265	TP53
ER-Phagosome pathway Homo sapiens R-HSA-1236974	0.164554	6.90625	13.6172	HLA-A
G1/S DNA Damage Checkpoints Homo sapiens R-HSA-69615	0.164554	6.90625	13.6172	TP53
DNA Repair Homo sapiens R-HSA-73894	0.164554	3.15949	6.22325	TP53;ACTB
Cell Cycle Homo sapiens R-HSA-1640170	0.165641	2.40295	4.71145	MYC;BIRC5;TP53
Cytosolic sensors of pathogen-associated DNA Homo sapiens R-HSA-1834949	0.16576	6.79966	13.3107	CTNNB1
Regulation of RAS by GAPs Homo sapiens R-HSA-5658442	0.167681	6.6963	13.0151	HRAS
Amyloid fiber formation Homo sapiens R-HSA-977225	0.169181	6.59602	12.7297	INS
Cyclin E associated events during G1/S transition Homo sapiens R-HSA-69202	0.169181	6.59602	12.7297	MYC
Cyclin A:Cdk2-associated events at S phase entry Homo sapiens R-HSA-69656	0.17107	6.49869	12.4541	MYC
ISG15 antiviral mechanism Homo sapiens R-HSA-1169408	0.177073	6.22316	11.6818	PLCG1
Antiviral mechanism by IFN-stimulated genes Homo sapiens R-HSA-1169410	0.177073	6.22316	11.6818	PLCG1
Positive epigenetic regulation of rRNA expression Homo sapiens R-HSA-5250913	0.178486	6.13642	11.4411	ACTB
Signaling by TGF-beta Receptor Complex Homo sapiens R-HSA-170834	0.178486	6.13642	11.4411	MYC
G alpha (12/13) signalling events Homo sapiens R-HSA-416482	0.182541	5.96997	10.9825	PIK3CA
Senescence-Associated Secretory Phenotype (SASP) Homo sapiens R-HSA-2559582	0.186557	5.81228	10.5522	STAT3
COPI-mediated anterograde transport Homo sapiens R-HSA-6807878	0.187887	5.73651	10.3469	INS
G2/M DNA damage checkpoint Homo sapiens R-HSA-69473	0.187887	5.73651	10.3469	TP53
Transcriptional regulation of white adipocyte differentiation Homo sapiens R-HSA-381340	0.189199	5.66268	10.1478	TNF
Glucose metabolism Homo sapiens R-HSA-70326	0.189199	5.66268	10.1478	GAPDH
Regulation of insulin secretion Homo sapiens R-HSA-422356	0.190938	5.59072	9.95461	INS
Global Genome Nucleotide Excision Repair (GG-NER) Homo sapiens R-HSA-5696399	0.193927	5.45213	9.58515	ACTB
Degradation of beta-catenin by the destruction complex Homo sapiens R-HSA-195253	0.193927	5.45213	9.58515	CTNNB1
Antigen processing-Cross presentation Homo sapiens R-HSA-1236975	0.193927	5.45213	9.58515	HLA-A
p75 NTR receptor-mediated signalling Homo sapiens R-HSA-193704	0.195624	5.38537	9.40839	CASP3
Regulation of mRNA stability by proteins that bind AU-rich elements Homo sapiens R-HSA-450531	0.201566	5.19451	8.90756	AKT1
Regulation of TP53 Activity through Phosphorylation Homo sapiens R-HSA-6804756	0.207437	5.01667	8.44702	TP53
GPCR downstream signaling Homo sapiens R-HSA-388396	0.210372	1.84591	3.07795	PIK3CA;CXCR4;AKT1;IL2
Oxidative Stress Induced Senescence Homo sapiens R-HSA-2559580	0.210667	4.90469	8.16019	TP53
MAPK6/MAPK4 signaling Homo sapiens R-HSA-5687128	0.212264	4.85055	8.02239	MYC
TNFR2 non-canonical NF-kB pathway Homo sapiens R-HSA-5668541	0.217973	4.69504	7.62988	TNF
Regulation of actin dynamics for phagocytic cup formation Homo sapiens R-HSA-2029482	0.220072	4.59676	7.38441	ACTB
MyD88-independent TLR3/TLR4 cascade Homo sapiens R-HSA-166166	0.220072	4.59676	7.38441	PTPN11
Toll Like Receptor 3 (TLR3) Cascade Homo sapiens R-HSA-168164	0.220072	4.59676	7.38441	PTPN11
TRIF-mediated TLR3/TLR4 signaling Homo sapiens R-HSA-937061	0.220072	4.59676	7.38441	PTPN11
Resolution of Sister Chromatid Cohesion Homo sapiens R-HSA-2500257	0.223617	4.50249	7.15089	BIRC5
Degradation of the extracellular matrix Homo sapiens R-HSA-1474228	0.23708	4.20085	6.41676	CASP3
HATs acetylate histones Homo sapiens R-HSA-3214847	0.237987	4.16101	6.32135	ACTB
Mitotic Prometaphase Homo sapiens R-HSA-68877	0.237987	4.16101	6.32135	BIRC5
Nucleotide Excision Repair Homo sapiens R-HSA-5696398	0.239416	4.12191	6.22808	ACTB
Integration of energy metabolism Homo sapiens R-HSA-163685	0.242779	4.04587	6.04772	INS
G1/S Transition Homo sapiens R-HSA-69206	0.245565	3.97257	5.87518	MYC
Activated TLR4 signalling Homo sapiens R-HSA-166054	0.245565	3.97257	5.87518	PTPN11
Epigenetic regulation of gene expression Homo sapiens R-HSA-212165	0.250769	3.86745	5.63003	ACTB
S Phase Homo sapiens R-HSA-69242	0.267188	3.58284	4.98057	MYC
Membrane Trafficking Homo sapiens R-HSA-199991	0.269295	2.1244	2.9318	AKT1;INS
ER to Golgi Anterograde Transport Homo sapiens R-HSA-199977	0.27892	3.38872	4.55017	INS
Mitotic G1-G1/S phases Homo sapiens R-HSA-453279	0.287383	3.26239	4.27586	MYC
Factors involved in megakaryocyte development and platelet production Homo sapiens R-HSA-983231	0.295707	3.14508	4.02542	TP53
Neurotransmitter Receptor Binding And Downstream Transmission In The Postsynaptic Cell Homo sapiens R-HSA-112314	0.296836	3.12262	3.97795	HRAS
Beta-catenin independent WNT signaling Homo sapiens R-HSA-3858494	0.299718	3.07863	3.88545	CTNNB1
DNA Double-Strand Break Repair Homo sapiens R-HSA-5693532	0.300821	3.0571	3.84039	TP53
G2/M Checkpoints Homo sapiens R-HSA-69481	0.308864	2.95377	3.62623	TP53
Phospholipid metabolism Homo sapiens R-HSA-1483257	0.326942	2.74917	3.21272	PIK3CA
Transport to the Golgi and subsequent modification Homo sapiens R-HSA-948021	0.327206	2.73195	3.1786	INS
Separation of Sister Chromatids Homo sapiens R-HSA-2467813	0.327206	2.73195	3.1786	BIRC5
Vesicle-mediated transport Homo sapiens R-HSA-5653656	0.327295	1.80557	2.09638	AKT1;INS
Gene Expression Homo sapiens R-HSA-74160	0.334159	1.37461	1.56453	MYC;AKT1;BIRC5;TP53;ACTB
Mitotic Anaphase Homo sapiens R-HSA-68882	0.342417	2.55581	2.83559	BIRC5
G2/M Transition Homo sapiens R-HSA-69275	0.342417	2.55581	2.83559	TP53
Mitotic Metaphase and Anaphase Homo sapiens R-HSA-2555396	0.343299	2.54091	2.8071	BIRC5
Mitotic G2-G2/M phases Homo sapiens R-HSA-453274	0.344173	2.52618	2.77902	TP53
Cell Cycle Checkpoints Homo sapiens R-HSA-69620	0.354547	2.42762	2.59335	TP53
G alpha (q) signalling events Homo sapiens R-HSA-416476	0.367787	2.31158	2.37973	PIK3CA
Peptide ligand-binding receptors Homo sapiens R-HSA-375276	0.370074	2.28727	2.33568	CXCR4
Transmission across Chemical Synapses Homo sapiens R-HSA-112315	0.396193	2.08931	1.98663	HRAS
Chromatin organization Homo sapiens R-HSA-4839726	0.416028	1.94854	1.74939	ACTB
Chromatin modifying enzymes Homo sapiens R-HSA-3247509	0.416028	1.94854	1.74939	ACTB
G alpha (i) signalling events Homo sapiens R-HSA-418594	0.43453	1.8331	1.56214	CXCR4
Metabolism Homo sapiens R-HSA-1430728	0.457875	1.15677	0.922824	PIK3CA;AKT1;PLCG1;GAPDH;INS
Asparagine N-linked glycosylation Homo sapiens R-HSA-446203	0.457932	1.69647	1.34961	INS
M Phase Homo sapiens R-HSA-68886	0.468522	1.63854	1.26264	BIRC5
Metabolism of carbohydrates Homo sapiens R-HSA-71387	0.485005	1.55579	1.14185	GAPDH
Neuronal System Homo sapiens R-HSA-112316	0.506767	1.45585	1.00158	HRAS
Class I MHC mediated antigen processing & presentation Homo sapiens R-HSA-983169	0.510377	1.4364	0.975028	HLA-A
Class A/1 (Rhodopsin-like receptors) Homo sapiens R-HSA-373076	0.529725	1.35487	0.866464	CXCR4
GPCR ligand binding Homo sapiens R-HSA-500792	0.648213	0.971998	0.423398	CXCR4
Metabolism of lipids and lipoproteins Homo sapiens R-HSA-556833	0.78626	0.651672	0.156706	PIK3CA

## Sheet: Bioplanet
Term	Adjusted P-value	Odds Ratio	Combined Score	Genes
T cell receptor signaling pathway	6.97426e-21	85.9881	4552.96	IL10;TNF;IL2;IL4;CD4;PTPRC;IFNG;PIK3CA;LCK;CD8A;CD28;AKT1;FYN;PTPN6;PLCG1;HRAS
CXCR4 signaling pathway	1.25724e-16	75.9232	3223.39	ITGB1;STAT3;CXCR4;PTPN11;CD4;PTPRC;PIK3CA;LCK;AKT1;FYN;PTPN6;PLCG1;HRAS
Pathways in cancer	2.39887e-15	33.9072	1325.84	ITGB1;STAT3;FGF2;HIF1A;EGFR;VEGFA;PIK3CA;CASP3;MYC;ERBB2;AKT1;BIRC5;CTNNB1;PLCG1;HRAS;TP53
Antigen-activated B-cell receptor generation of second messengers	4.01915e-15	43.8766	1678.37	IL10;PTPN11;IL2;IL4;CD4;PTPRC;PIK3CA;MYC;CD28;AKT1;FYN;PTPN6;PLCG1;HRAS
Interleukin-2 signaling pathway	4.01915e-15	19.4522	740.642	EOMES;IL10;ITGAM;STAT3;CXCR4;PTPN11;TNF;ACTB;IL2;VEGFA;PTPRC;IFNG;PIK3CA;LCK;CASP3;MYC;AKT1;FYN;PTPN6;HRAS;GAPDH
T cell receptor signaling in naive CD8+ T cells	4.52038e-15	122.895	4642.37	PTPRC;LCK;CD8A;CD28;AKT1;FYN;PTPN6;PLCG1;HLA-A;HRAS
T cell receptor signaling in naive CD4+ T cells	3.22139e-14	96.9639	3457.46	CD4;PTPRC;LCK;CD28;AKT1;FYN;PTPN11;PTPN6;PLCG1;HRAS
Prolactin activation of MAPK signaling	9.2991e-14	84.9957	2929.25	ITGB1;PIK3CA;CASP3;MYC;ERBB2;STAT3;AKT1;FYN;PTPN11;HRAS
SHP2 signaling	4.97765e-13	100.875	3295.4	IFNG;PIK3CA;BDNF;LCK;PTPN11;HRAS;EGFR;IL2;VEGFA
Natural killer cell-mediated cytotoxicity	7.15037e-13	49.4576	1588.44	IFNG;PIK3CA;LCK;CASP3;FYN;PTPN11;PTPN6;PLCG1;HLA-A;TNF;HRAS
Cell surface interactions at the vascular wall	7.15037e-13	65.7077	2109.56	ITGB1;ITGAM;PIK3CA;LCK;PECAM1;FYN;PTPN11;PTPN6;PLCG1;HRAS
Trefoil factor initiation of mucosal healing	1.09946e-12	139.818	4416.56	ITGB1;PIK3CA;CASP3;ERBB2;AKT1;CTNNB1;HRAS;EGFR
Interleukin-12-mediated signaling events	1.20828e-12	86.4295	2715.06	EOMES;IL4;CD4;IFNG;LCK;CD8A;STAT3;HLA-A;IL2
AP-1 transcription factor network	2.26362e-12	79.3252	2436.21	IL10;IL4;IFNG;MYC;CTNNB1;HLA-A;HIF1A;TP53;IL2
Disease	2.47094e-12	17.2177	526.088	STAT3;CXCR4;PTPN11;HLA-A;FGF2;EGFR;ACTB;INS;CD4;PIK3CA;LCK;MYC;CD28;AKT1;FYN;PLCG1;HRAS
Platelet endothelial cell adhesion molecule 1 (PECAM1) interactions	4.15732e-12	498.7	14946.2	LCK;PECAM1;FYN;PTPN11;PTPN6;PLCG1
Immune system	7.2633e-12	13.6392	400.333	ITGB1;STAT3;PTPN11;HLA-A;IL2;CD4;PTPRC;IFNG;PIK3CA;LCK;CD8A;CD28;AKT1;FYN;NCAM1;PTPN6;PLCG1;CD34;HRAS
Endometrial cancer	1.10159e-11	95.2632	2751.01	PIK3CA;MYC;ERBB2;AKT1;CTNNB1;HRAS;TP53;EGFR
Cell adhesion molecules (CAMs)	1.44918e-11	44.7855	1278.61	ITGB1;CD4;ITGAM;PTPRC;CD8A;CD28;PECAM1;NCAM1;HLA-A;CD34
Jak-STAT signaling pathway	2.43391e-11	33.0435	924.553	IL10;IL4;PTPRC;IFNG;PIK3CA;MYC;STAT3;AKT1;PTPN11;PTPN6;IL2
Immune system signaling by interferons, interleukins, prolactin, and growth hormones	3.74891e-11	25.9254	712.925	IFNG;PIK3CA;LCK;STAT3;FYN;NCAM1;PTPN11;PTPN6;PLCG1;HLA-A;HRAS;IL2
EGF receptor (ErbB1) signaling pathway	4.24019e-11	127.731	3490.82	PIK3CA;STAT3;PTPN11;PTPN6;PLCG1;HRAS;EGFR
Allograft rejection	6.18849e-11	119.203	3207.4	IL10;IL4;IFNG;CD28;HLA-A;TNF;IL2
Adaptive immune system	8.6591e-11	15.8531	420.559	ITGB1;PTPN11;HLA-A;CD4;PTPRC;PIK3CA;LCK;CD8A;CD28;AKT1;FYN;PTPN6;PLCG1;CD34;HRAS
Signaling events mediated by VEGFR1 and VEGFR2	9.65172e-11	67.545	1781.78	PIK3CA;AKT1;CTNNB1;FYN;PTPN11;PTPN6;PLCG1;VEGFA
Focal adhesion	1.04745e-10	27.9346	733.51	ITGB1;ITGAM;PIK3CA;ERBB2;AKT1;CTNNB1;FYN;HRAS;EGFR;ACTB;VEGFA
Costimulation by the CD28 family	1.12923e-10	65.4276	1710.62	CD4;PIK3CA;LCK;CD28;AKT1;FYN;PTPN11;PTPN6
Leukocyte transendothelial migration	1.32652e-10	44.6982	1159.74	ITGB1;ITGAM;PIK3CA;PECAM1;CXCR4;CTNNB1;PTPN11;PLCG1;ACTB
E-cadherin keratinocyte pathway	1.32652e-10	199.39	5166.73	PIK3CA;AKT1;CTNNB1;FYN;PLCG1;EGFR
Developmental biology	1.60296e-10	18.9197	486.038	ITGB1;PTPN11;TNF;EGFR;INS;PTPRC;ERBB2;AKT1;CTNNB1;FYN;NCAM1;PLCG1;HRAS
Signaling by SCF-KIT	1.90724e-10	59.8015	1523.92	PIK3CA;LCK;STAT3;AKT1;FYN;PTPN11;PTPN6;HRAS
Angiogenesis	2.22873e-10	175.915	4449.83	PIK3CA;AKT1;PLCG1;FGF2;HIF1A;VEGFA
Post-translational regulation of adherens junction stability and disassembly	3.02731e-10	87.1739	2175.72	BDNF;CASP3;CTNNB1;FYN;PTPN6;HRAS;EGFR
Angiopoietin receptor Tie2-mediated signaling	3.32436e-10	85.094	2110.84	ITGB1;PIK3CA;AKT1;FYN;PTPN11;FGF2;TNF
Interleukin-5 signaling pathway	3.32436e-10	85.094	2110.84	IL4;CD4;MYC;STAT3;AKT1;PTPN11;IL2
Selective expression of chemokine receptors during T-cell polarization	4.37368e-10	149.505	3659.29	IL4;CD4;IFNG;CD28;CXCR4;IL2
ERBB2 role in signal transduction and oncology	4.37368e-10	149.505	3659.29	PIK3CA;ERBB2;STAT3;AKT1;HRAS;EGFR
Prostate cancer	4.6002e-10	51.6517	1260.24	PIK3CA;ERBB2;AKT1;CTNNB1;HRAS;TP53;EGFR;INS
Signaling events mediated by PTP1B	4.62274e-10	79.4091	1935.04	PIK3CA;LCK;STAT3;AKT1;FYN;EGFR;INS
Hemostasis pathway	4.64369e-10	16.8823	410.883	ITGB1;ITGAM;PTPN11;VEGFA;PIK3CA;LCK;PECAM1;AKT1;FYN;PTPN6;PLCG1;HRAS;TP53
VEGFR1 pathway	5.06601e-10	142.379	3449.32	PIK3CA;AKT1;PTPN11;PLCG1;HIF1A;VEGFA
Non-small cell lung cancer	5.66299e-10	76.0224	1831.45	PIK3CA;ERBB2;AKT1;PLCG1;HRAS;TP53;EGFR
ERBB signaling pathway	6.35347e-10	48.6365	1164.96	PIK3CA;MYC;ERBB2;AKT1;PLCG1;HRAS;TP53;EGFR
T cell receptor regulation of apoptosis	6.82532e-10	14.384	343.17	IL10;TNF;IL2;IL4;PTPRC;IFNG;LCK;CASP3;MYC;ERBB2;CD28;BIRC5;HRAS;GAPDH
Interferon-gamma signaling pathway	7.84217e-10	46.9899	1113.49	IFNG;PIK3CA;STAT3;AKT1;NCAM1;PTPN11;PTPN6;HLA-A
Interleukin-2/STAT5 pathway	9.0111e-10	124.562	2931.63	IL4;PIK3CA;LCK;MYC;PTPN11;IL2
FGF signaling pathway	1.20615e-09	66.1443	1534.64	PIK3CA;STAT3;AKT1;NCAM1;PTPN11;PLCG1;FGF2
Leptin signaling pathway	1.20615e-09	66.1443	1534.64	ERBB2;STAT3;AKT1;FYN;PTPN11;PLCG1;HRAS
Interleukin-4 signaling pathway	1.26848e-09	43.5482	1007.28	IL10;IL4;PIK3CA;STAT3;AKT1;BIRC5;PTPN11;PTPN6
Colorectal cancer	1.30305e-09	64.9385	1498.99	PIK3CA;CASP3;MYC;AKT1;BIRC5;CTNNB1;TP53
Signaling by interleukins	1.78241e-09	41.382	941.447	PIK3CA;LCK;STAT3;FYN;PTPN11;PTPN6;HRAS;IL2
EPO receptor signaling	1.79319e-09	106.746	2425.78	PTPRC;STAT3;AKT1;PTPN6;PLCG1;HRAS
Cytokines and inflammatory response	2.04265e-09	103.06	2322.81	IL10;IL4;CD4;IFNG;TNF;IL2
Interleukin-2/PI3K pathway	2.04265e-09	103.06	2322.81	PIK3CA;LCK;MYC;AKT1;PTPN11;IL2
Interleukin-7 signaling pathway	2.04265e-09	103.06	2322.81	PIK3CA;LCK;MYC;STAT3;AKT1;FYN
CD8/T cell receptor downstream pathway	2.27002e-09	58.5334	1312.02	EOMES;IFNG;CD8A;HLA-A;TNF;HRAS;IL2
B cell survival pathway	2.66804e-09	221.098	4916.23	ITGB1;PIK3CA;CASP3;AKT1;BIRC5
Pancreatic cancer	2.70098e-09	56.6695	1258.4	PIK3CA;ERBB2;STAT3;AKT1;TP53;EGFR;VEGFA
Interleukin-23-mediated signaling events	2.71793e-09	96.4016	2138.43	CD4;IFNG;PIK3CA;STAT3;TNF;IL2
Leishmaniasis	3.19751e-09	54.9203	1208.42	ITGB1;IL10;IL4;ITGAM;IFNG;PTPN6;TNF
TGF-beta signaling pathway	3.78412e-09	27.3345	596.391	ITGB1;IFNG;MYC;STAT3;AKT1;CTNNB1;TNF;HRAS;TP53
Signal transduction	4.84362e-09	10.0664	216.983	ITGB1;ITGAM;CXCR4;FGF2;HIF1A;EGFR;INS;GFAP;LCK;CASP3;MYC;ERBB2;AKT1;CTNNB1;FYN;HRAS
PDGFB signaling pathway	5.43568e-09	34.5072	738.272	PIK3CA;LCK;MYC;STAT3;FYN;PTPN11;PLCG1;HRAS
Bladder cancer	5.43568e-09	82.9917	1774.14	MYC;ERBB2;HRAS;TP53;EGFR;VEGFA
Signaling events mediated by T cell protein tyrosine phosphatase (TC-PTP)	5.43568e-09	82.9917	1774.14	ITGB1;PIK3CA;STAT3;EGFR;INS;VEGFA
VEGF, hypoxia, and angiogenesis	5.43568e-09	82.9917	1774.14	PIK3CA;AKT1;PLCG1;HIF1A;HRAS;VEGFA
Fc epsilon receptor I signaling pathway	5.56764e-09	49.5634	1057.6	IL4;PIK3CA;AKT1;FYN;PLCG1;TNF;HRAS
Type 1 diabetes mellitus	6.03214e-09	80.7446	1714.11	IFNG;CD28;HLA-A;TNF;IL2;INS
Growth hormone receptor signaling	6.03214e-09	80.7446	1714.11	PIK3CA;STAT3;PTPN6;PLCG1;HRAS;INS
ERBB2/ERBB3 signaling events	6.87301e-09	78.6158	1657.52	PIK3CA;ERBB2;STAT3;AKT1;PTPN11;HRAS
Interleukin-3 signaling pathway	7.69691e-09	76.5962	1604.11	STAT3;AKT1;FYN;PTPN11;PTPN6;HRAS
Interleukin-3, interleukin-5, and GM-CSF signaling	7.69691e-09	76.5962	1604.11	PIK3CA;FYN;PTPN11;PTPN6;HRAS;IL2
Alpha-6 beta-1 and alpha-6 beta-4 integrin signaling	8.71524e-09	74.6775	1553.62	ITGB1;PIK3CA;ERBB2;AKT1;HRAS;EGFR
CD28-dependent PI3K/Akt signaling	9.36627e-09	151.966	3146.52	PIK3CA;LCK;CD28;AKT1;FYN
T cell activation co-stimulatory signal	9.36627e-09	151.966	3146.52	PIK3CA;LCK;CD28;PTPN11;IL2
Collagen binding in corneal epithelia mediated by Erk and PI-3 Kinase	1.50344e-08	135.068	2729.15	ITGB1;PIK3CA;FYN;PLCG1;HRAS
Th1/Th2 differentiation pathway	1.50344e-08	135.068	2729.15	IL10;IL4;IFNG;CD28;IL2
Signaling events mediated by stem cell factor receptor (c-Kit)	1.73245e-08	64.9174	1300.84	PIK3CA;STAT3;AKT1;PTPN11;PTPN6;HRAS
Interleukin-2 receptor beta chain in T cell activation	1.73245e-08	64.9174	1300.84	PIK3CA;MYC;AKT1;PTPN6;HRAS;IL2
Ras-independent pathway in NK cell-mediated cytotoxicity	1.82475e-08	127.953	2555.71	ITGB1;PIK3CA;CD28;PTPN6;HLA-A
Integrin signaling pathway	1.87906e-08	28.3666	565.408	ITGB1;PTPRC;PIK3CA;AKT1;FYN;PLCG1;HRAS;ACTB
Kit receptor signaling pathway	2.11016e-08	62.2062	1231.93	STAT3;AKT1;PTPN11;PTPN6;PLCG1;HRAS
Axon guidance	2.25665e-08	17.3183	341.598	ITGB1;PTPRC;ERBB2;CXCR4;FYN;NCAM1;PTPN11;PLCG1;HRAS;EGFR
Signaling by ERBB2	2.72006e-08	37.5204	732.619	PIK3CA;ERBB2;AKT1;FYN;PLCG1;HRAS;EGFR
ERK5 role in neuronal survival pathway	3.24531e-08	110.488	2136.56	PIK3CA;BDNF;AKT1;PLCG1;HRAS
Natural killer cell receptor signaling pathway	3.80962e-08	55.2778	1058.7	PIK3CA;LCK;AKT1;PTPN6;PLCG1;HRAS
Neurotrophic factor-mediated Trk receptor signaling	3.80962e-08	55.2778	1058.7	PIK3CA;BDNF;STAT3;PTPN11;PLCG1;HRAS
Nef in HIV-1 replication and disease pathogenesis	3.80962e-08	105.679	2022.95	CD4;LCK;CD28;FYN;HLA-A
Epidermal growth factor receptor (EGFR) pathway	4.64947e-08	34.2579	648.57	PIK3CA;ERBB2;AKT1;PLCG1;HRAS;EGFR;ACTB
Folate metabolism	4.98045e-08	52.3605	987.103	IL4;IFNG;TNF;TP53;IL2;INS
Inflammatory response pathway	5.26577e-08	97.2146	1825.14	IL4;IFNG;LCK;CD28;IL2
PDGFA signaling pathway	5.26577e-08	97.2146	1825.14	PIK3CA;STAT3;PLCG1;HRAS;EGFR
Fas signaling pathway	5.7008e-08	32.9824	616.249	PIK3CA;CASP3;AKT1;PTPN6;TP53;EGFR;ACTB
Glioma	5.77705e-08	50.5805	943.842	PIK3CA;AKT1;PLCG1;HRAS;TP53;EGFR
CD28 co-stimulation	6.00656e-08	93.4709	1738.58	PIK3CA;LCK;CD28;AKT1;FYN
PD-1 signaling	6.00656e-08	93.4709	1738.58	CD4;PTPRC;LCK;PTPN11;PTPN6
Notch signaling pathway	7.79625e-08	31.2371	572.545	IL4;LCK;MYC;STAT3;AKT1;TNF;HIF1A
Renal cell carcinoma	8.72097e-08	46.6172	848.744	PIK3CA;AKT1;PTPN11;HIF1A;HRAS;VEGFA
Interleukin-6 signaling pathway	9.31946e-08	45.8977	831.671	PIK3CA;MYC;STAT3;AKT1;PTPN11;HRAS
Melanoma	9.31946e-08	45.8977	831.671	PIK3CA;AKT1;FGF2;HRAS;TP53;EGFR
Neurotrophin signaling pathway	9.927e-08	29.917	539.913	PIK3CA;BDNF;AKT1;PTPN11;PLCG1;HRAS;TP53
MEF2D role in T cell apoptosis	1.07177e-07	80.9919	1454.58	CD4;PTPRC;LCK;FYN;PLCG1
Chronic myeloid leukemia	1.07177e-07	44.5231	799.224	PIK3CA;MYC;AKT1;PTPN11;HRAS;TP53
Signaling by FGFR in disease	1.07564e-07	29.4196	527.713	PIK3CA;STAT3;AKT1;PTPN11;PLCG1;FGF2;HRAS
T helper cell surface molecules	1.12081e-07	211.058	3772.87	CD4;PTPRC;CD8A;CD28
Lck and Fyn tyrosine kinases in initiation of T cell receptor activation	1.12081e-07	211.058	3772.87	CD4;PTPRC;LCK;FYN
Adherens junction cell adhesion	1.12081e-07	43.8662	783.797	ERBB2;CTNNB1;FYN;PTPN6;EGFR;ACTB
Signaling of hepatocyte growth factor receptor	1.55853e-07	73.6179	1290.44	ITGB1;PIK3CA;STAT3;PTPN11;HRAS
Signaling events mediated by hepatocyte growth factor receptor (c-Met)	1.63677e-07	40.8514	713.703	PIK3CA;AKT1;CTNNB1;PTPN11;PLCG1;HRAS
Adhesion and diapedesis of granulocytes	2.02102e-07	172.667	2975.51	ITGAM;IFNG;PECAM1;TNF
TrkA receptor signaling pathway	2.02102e-07	172.667	2975.51	PIK3CA;AKT1;PLCG1;HRAS
Hematopoiesis regulation by cytokines	2.02102e-07	172.667	2975.51	IL4;CD4;CD8A;IL2
MAPK signaling pathway	2.08754e-07	15.6704	269.397	BDNF;CASP3;MYC;AKT1;FGF2;TNF;HRAS;TP53;EGFR
Alpha-M beta-2 integrin signaling	2.15533e-07	67.4729	1156.03	ITGAM;LCK;AKT1;FYN;TNF
Bioactive peptide-induced signaling pathway	2.15533e-07	67.4729	1156.03	PIK3CA;STAT3;FYN;PLCG1;HRAS
Graft-versus-host disease	2.15533e-07	67.4729	1156.03	IFNG;CD28;HLA-A;TNF;IL2
MicroRNAs in cardiomyocyte hypertrophy	2.37467e-07	37.7373	642.582	PIK3CA;STAT3;AKT1;CTNNB1;FGF2;TNF
Actin cytoskeleton regulation	2.47603e-07	19.0594	323.58	ITGB1;ITGAM;PIK3CA;FGF2;HRAS;EGFR;ACTB;INS
Hematopoietic cell lineage	2.87818e-07	36.3512	611.373	IL4;CD4;ITGAM;CD8A;TNF;CD34
Integrated breast cancer pathway	3.06007e-07	24.5204	410.689	CASP3;MYC;AKT1;CTNNB1;TP53;EGFR;VEGFA
Signaling by FGFR mutants	3.31832e-07	60.7134	1010.96	PIK3CA;STAT3;PLCG1;FGF2;HRAS
Interleukin-12/STAT4 pathway	3.31832e-07	60.7134	1010.96	CD4;IFNG;STAT3;CD28;IL2
Signaling by ERBB4	3.88315e-07	34.2534	564.701	PIK3CA;AKT1;PTPN11;HRAS;EGFR;GFAP
Apoptosis	3.99668e-07	17.7418	291.835	PIK3CA;CASP3;MYC;AKT1;BIRC5;CTNNB1;TNF;TP53
Regulation of NFAT transcription factors	4.05236e-07	57.8165	949.762	IL4;IFNG;CASP3;TNF;IL2
Intestinal immune network for IgA production	4.48e-07	56.4691	921.512	IL10;IL4;CD28;CXCR4;IL2
PTEN-dependent cell cycle arrest and apoptosis	4.91115e-07	126.597	2050.33	ITGB1;PIK3CA;AKT1;EGFR
Signaling by constitutively active EGFR	4.91115e-07	126.597	2050.33	PIK3CA;PLCG1;HRAS;EGFR
Telomeres, telomerase, cellular aging, and immortality	4.91115e-07	126.597	2050.33	MYC;AKT1;TP53;EGFR
Tob role in T-cell activation	4.91115e-07	126.597	2050.33	IL4;IFNG;CD28;IL2
Wnt signaling pathway and pluripotency	4.99191e-07	32.3837	523.702	SOX2;MYC;CTNNB1;NANOG;TP53;POU5F1
Autoimmune thyroid disease	6.44653e-07	51.6528	821.716	IL10;IL4;CD28;HLA-A;IL2
Chagas disease	7.01516e-07	30.3918	480.688	IL10;IFNG;PIK3CA;AKT1;TNF;IL2
Amoebiasis	7.31752e-07	30.0833	474.09	IL10;ITGAM;IFNG;PIK3CA;CASP3;TNF
Fibroblast growth factor receptor pathway	7.31752e-07	30.0833	474.09	PIK3CA;AKT1;PTPN11;PLCG1;FGF2;HRAS
Cytokine-cytokine receptor interaction	7.31971e-07	16.1352	254.154	IL10;IL4;IFNG;CXCR4;TNF;EGFR;IL2;VEGFA
CTLA4 inhibitory signaling	8.75086e-07	105.481	1641.89	LCK;AKT1;PTPN11;FYN
Leptin influence on immune response	9.44564e-07	28.6298	443.246	CD4;ITGAM;IFNG;CXCR4;TNF;VEGFA
Acute myeloid leukemia	9.7789e-07	46.6745	720.658	PIK3CA;MYC;STAT3;AKT1;HRAS
Signaling by EGFR in cancer	9.82586e-07	28.3557	437.476	PIK3CA;AKT1;PTPN11;PLCG1;HRAS;EGFR
mTOR signaling pathway	1.08491e-06	27.8229	426.301	PIK3CA;AKT1;HIF1A;HRAS;INS;VEGFA
Tumor suppressor Arf inhibits ribosomal biogenesis	1.21376e-06	94.9238	1442.43	PIK3CA;MYC;AKT1;TP53
Inhibition of cellular proliferation by Gleevec	1.21376e-06	94.9238	1442.43	PIK3CA;MYC;AKT1;HRAS
Ephrin receptor B forward pathway	1.22494e-06	44.122	669.749	PIK3CA;LCK;CXCR4;FYN;HRAS
TPO signaling pathway	1.42263e-06	90.3991	1358.06	PIK3CA;STAT3;PLCG1;HRAS
Signaling by PDGF	1.65055e-06	25.6526	381.389	PIK3CA;STAT3;AKT1;PTPN11;PLCG1;HRAS
Interleukin-27-mediated signaling events	1.65564e-06	86.2857	1282	IFNG;STAT3;TNF;IL2
ERK1/ERK2 MAPK pathway	1.77518e-06	40.435	597.4	ITGB1;MYC;STAT3;HRAS;EGFR
LPA receptor mediated events	1.77518e-06	40.435	597.4	CASP3;AKT1;PLCG1;HRAS;EGFR
Thyroid-stimulating hormone signaling pathway	1.90463e-06	39.7701	584.512	PIK3CA;MYC;STAT3;AKT1;HRAS
Telomerase regulation	2.04111e-06	39.1267	572.088	IFNG;MYC;AKT1;EGFR;IL2
Interleukin receptor SHC signaling	2.18557e-06	79.0873	1150.44	PIK3CA;PTPN6;HRAS;IL2
Cell-cell communication	2.18996e-06	24.1841	351.586	ITGB1;PIK3CA;CTNNB1;FYN;PTPN11;PTPN6
NFAT involvement in hypertrophy of the heart	2.321e-06	37.9002	548.538	PIK3CA;AKT1;FGF2;TNF;HRAS
Reelin signaling pathway	2.4504e-06	75.92	1093.23	ITGB1;PIK3CA;AKT1;FYN
Thyroid cancer	2.4504e-06	75.92	1093.23	MYC;CTNNB1;HRAS;TP53
IGF1 pathway	2.4504e-06	75.92	1093.23	PIK3CA;AKT1;PTPN11;HRAS
Viral myocarditis	2.61189e-06	36.748	526.581	CASP3;CD28;FYN;HLA-A;ACTB
Signaling by FGFR1 mutants	2.78714e-06	72.9963	1040.8	PIK3CA;STAT3;PLCG1;FGF2
Integrins in angiogenesis	3.17482e-06	35.1449	496.309	PIK3CA;AKT1;PTPN11;FGF2;VEGFA
EGF/EGFR signaling pathway	3.51193e-06	22.0211	308.618	ERBB2;STAT3;AKT1;PTPN11;PLCG1;EGFR
VEGF signaling pathway	3.58393e-06	34.1515	477.716	PIK3CA;AKT1;PLCG1;HRAS;VEGFA
Glycoprotein VI-mediated activation cascade	4.03912e-06	65.4351	907.09	PIK3CA;LCK;AKT1;FYN
EGF receptor transactivation by GPCRs in cardiac hypertrophy	4.51459e-06	63.2508	868.999	MYC;PLCG1;HRAS;EGFR
N-cadherin signaling events	4.51459e-06	63.2508	868.999	PIK3CA;CTNNB1;PTPN11;PLCG1
Antigen processing and presentation	4.8093e-06	31.8967	436.017	CD4;IFNG;CD8A;HLA-A;TNF
Primary immunodeficiency	5.02763e-06	61.2074	833.599	CD4;PTPRC;CD8A;LCK
Regular glucocorticoid receptor pathway	5.05198e-06	31.4808	428.406	IL4;IFNG;AKT1;TP53;IL2
T cell signal transduction	5.33489e-06	31.0757	421.014	PTPRC;LCK;CD28;PLCG1;HRAS
Phospholipase C signaling pathway	5.48245e-06	198.807	2686.82	PIK3CA;AKT1;PLCG1
GM-CSF-mediated signaling events	5.48245e-06	59.2917	800.625	PIK3CA;STAT3;PTPN11;HRAS
PI3K/PLC/TRK pathway	5.48245e-06	59.2917	800.625	PIK3CA;AKT1;PLCG1;HRAS
Small cell lung cancer	5.53193e-06	30.6808	413.834	ITGB1;PIK3CA;MYC;AKT1;TP53
CD28-dependent Vav1 pathway	7.31224e-06	173.948	2295.74	LCK;CD28;FYN
Monocyte and its surface molecules	7.31224e-06	173.948	2295.74	ITGB1;ITGAM;PECAM1
GAB1 signalosome	7.44376e-06	54.2014	714.067	PIK3CA;AKT1;PTPN11;EGFR
Neural crest differentiation	8.04794e-06	28.1736	368.81	ITGB1;MYC;CTNNB1;FGF2;GFAP
Interferon signaling	8.83002e-06	18.3259	238.095	IFNG;NCAM1;PTPN11;PTPN6;PLCG1;HLA-A
Interleukin-4 regulation of apoptosis	9.23836e-06	13.5955	175.945	IL10;ITGAM;CASP3;MYC;CXCR4;TNF;EGFR
PI3K events in ERBB2 signaling	1.19121e-05	47.4143	601.293	PIK3CA;ERBB2;AKT1;EGFR
Integrin-mediated cell adhesion	1.25467e-05	25.4929	321.829	ITGB1;ITGAM;AKT1;FYN;HRAS
Actions of nitric oxide in the heart	1.52683e-05	44.0997	547.441	PIK3CA;AKT1;PLCG1;VEGFA
Adhesion and diapedesis of lymphocytes	1.52683e-05	126.488	1569.91	ITGB1;PECAM1;CD34
Interferon gamma signaling regulation	1.52683e-05	126.488	1569.91	IFNG;PTPN11;PTPN6
ERBB1 downstream pathway	1.63548e-05	23.9713	295.741	PIK3CA;STAT3;AKT1;HRAS;EGFR
Signaling by insulin receptor	1.8657e-05	23.2763	283.976	PIK3CA;PTPN11;FGF2;HRAS;INS
Interleukin-17 signaling pathway	1.8749e-05	115.942	1413.33	CD4;CD8A;CD34
Malaria	2.07503e-05	40.3384	487.417	IL10;IFNG;PECAM1;TNF
HIV infection	2.25561e-05	15.2784	183.134	CD4;LCK;CD28;CXCR4;FYN;HLA-A
Interleukin-10 anti-inflammatory signaling pathway	2.25561e-05	107.018	1282.49	IL10;STAT3;TNF
KIT signaling regulation	2.25561e-05	107.018	1282.49	LCK;FYN;PTPN6
Platelet activation, signaling and aggregation	2.578e-05	14.8907	176.382	PIK3CA;LCK;PECAM1;AKT1;FYN;VEGFA
Platelet sensitization by LDL	2.66478e-05	99.3688	1171.69	PECAM1;PTPN11;PTPN6
Cadmium-induced DNA biosynthesis and proliferation in macrophages	2.66478e-05	99.3688	1171.69	MYC;TNF;HRAS
Cell to cell adhesion signaling	2.66478e-05	99.3688	1171.69	PECAM1;CTNNB1;PTPN11
Dendritic cells in regulating TH1 and TH2 development	2.66478e-05	99.3688	1171.69	IL10;IL4;IFNG
Thromboxane A2 receptor signaling	2.88611e-05	36.4505	426.708	LCK;AKT1;FYN;EGFR
Pathogenic Escherichia coli infection	3.06759e-05	35.761	416.094	ITGB1;CTNNB1;FYN;ACTB
PI3K cascade	3.06759e-05	35.761	416.094	PIK3CA;AKT1;PTPN11;FGF2
Tie2 signaling	3.11318e-05	92.7395	1076.77	PIK3CA;PTPN11;HRAS
Transcriptional activity regulation by PML	3.11318e-05	92.7395	1076.77	TNF;HRAS;TP53
p75 neurotrophin receptor-mediated signaling	3.227e-05	20.3269	235.178	PIK3CA;BDNF;CASP3;AKT1;TP53
Signaling by FGFR1 fusion mutants	3.61893e-05	86.939	994.619	PIK3CA;STAT3;PLCG1
IGF-1 receptor and longevity	3.61893e-05	86.939	994.619	PIK3CA;AKT1;HRAS
Inhibition of T cell receptor signaling by activated Csk	3.61893e-05	86.939	994.619	CD4;PTPRC;LCK
RAGE pathway	3.63984e-05	33.8401	386.786	ITGB1;CASP3;TNF;VEGFA
Signaling by NGF	3.65749e-05	13.7714	157.218	PIK3CA;CASP3;STAT3;AKT1;PLCG1;HRAS
HIV factor interactions with host	3.65749e-05	19.6619	224.447	CD4;LCK;CD28;FYN;HLA-A
Signaling events mediated by focal adhesion kinase	4.09039e-05	32.67	369.126	ITGB1;PIK3CA;FYN;PLCG1
4-1BB-dependent immune response	4.11036e-05	81.8208	922.899	IL4;IFNG;IL2
Apoptotic signaling in response to DNA damage	4.11036e-05	81.8208	922.899	CASP3;AKT1;TP53
Nerve growth factor (NGF) pathway	4.11036e-05	81.8208	922.899	PIK3CA;PLCG1;HRAS
Adipogenesis	4.30201e-05	18.8891	212.11	STAT3;CTNNB1;TNF;HIF1A;INS
MAPK cascade role in angiogenesis	4.53479e-05	31.5778	352.783	AKT1;PTPN11;PLCG1;VEGFA
IGF1 signaling pathway	4.7209e-05	77.2713	859.796	PIK3CA;PTPN11;HRAS
NGF signaling via TRKA from the plasma membrane	4.72655e-05	18.4537	205.227	PIK3CA;STAT3;AKT1;PLCG1;HRAS
Semaphorin interactions	5.0326e-05	30.5561	337.62	ITGB1;PTPRC;ERBB2;FYN
HIF-1 transcriptional activity in hypoxia	5.0326e-05	30.5561	337.62	CXCR4;AKT1;HIF1A;VEGFA
Adipocytokine signaling pathway	5.31876e-05	30.0695	330.443	STAT3;AKT1;PTPN11;TNF
Epithelial cell signaling in Helicobacter pylori infection	5.61606e-05	29.5982	323.519	CASP3;PTPN11;PLCG1;EGFR
BAD phosphorylation mediated by IGF1R signaling	6.01427e-05	69.5372	754.05	PIK3CA;AKT1;HRAS
CREB transcription factor and its extracellular signals	6.01427e-05	69.5372	754.05	PIK3CA;AKT1;HRAS
Hypoxia and p53 in the cardiovascular system	6.01427e-05	69.5372	754.05	AKT1;HIF1A;TP53
Modulation of interferon signaling by chaperones	6.01427e-05	69.5372	754.05	IFNG;TNF;TP53
Bacterial invasion of epithelial cells	6.51867e-05	28.2687	304.138	ITGB1;PIK3CA;CTNNB1;ACTB
SHC1 events in ERBB2 signaling	7.68273e-05	63.2093	669.114	ERBB2;HRAS;EGFR
IGF1 receptor signaling through beta-arrestin	7.68273e-05	63.2093	669.114	PIK3CA;AKT1;INS
Ras signaling pathway	8.63282e-05	60.458	632.675	PIK3CA;AKT1;HRAS
CTCF pathway	9.61198e-05	57.936	599.553	PIK3CA;MYC;TP53
Mammalian calpain regulation of cell motility	9.61198e-05	57.936	599.553	ITGB1;HRAS;EGFR
ATM-dependent DNA damage response	0.000112206	24.2686	247.284	MYC;ERBB2;CTNNB1;TP53
Insulin signaling pathway	0.000116979	10.8946	110.51	PIK3CA;AKT1;PTPN11;TNF;HRAS;INS
S1P/S1P3 pathway	0.000117143	53.4741	541.651	CXCR4;AKT1;VEGFA
T cell receptor calcium pathway	0.000117143	53.4741	541.651	IL4;IFNG;IL2
Influence of Ras and Rho proteins on G1 to S transition	0.000117143	53.4741	541.651	PIK3CA;AKT1;HRAS
Differentiation pathway in PC12 cells	0.000120754	23.6595	238.834	AKT1;PTPN11;PLCG1;HRAS
C-Myb transcription factor network	0.000124916	23.3663	234.786	CD4;MYC;CD34;HRAS
Integrin cell surface interactions	0.000124916	23.3663	234.786	ITGB1;ITGAM;PECAM1;AKT1
Myc active pathway	0.000124916	23.3663	234.786	MYC;BIRC5;GAPDH;TP53
Apoptosis intrinsic pathway	0.000126191	51.491	516.221	CASP3;AKT1;TP53
Asthma	0.000126191	51.491	516.221	IL10;IL4;TNF
Inactivation of GSK3 by Akt causes accumulation of beta-catenin in alveolar macrophages	0.000126191	51.491	516.221	PIK3CA;AKT1;CTNNB1
Alpha-6 beta-4 integrin signaling pathway	0.000138343	49.6495	492.786	AKT1;PTPN11;HRAS
CD40/CD40L signaling	0.000138343	49.6495	492.786	IL4;MYC;AKT1
Androgen receptor signaling, proteolysis, and transcription regulation	0.000139635	22.5283	223.299	STAT3;AKT1;CTNNB1;EGFR
Syndecan 4 pathway	0.000150558	47.935	471.128	ITGB1;CXCR4;FGF2
Netrin-mediated signaling events	0.000150558	47.935	471.128	PIK3CA;FYN;PLCG1
Syndecan 2 pathway	0.00016468	46.3349	451.059	ITGB1;CASP3;HRAS
Fc gamma receptor-mediated phagocytosis	0.000177874	21.0201	202.921	PTPRC;PIK3CA;AKT1;PLCG1
Ephrin receptor A forward pathway	0.000178884	44.838	432.417	LCK;FYN;PLCG1
Signal transduction by L1	0.000193789	43.4346	415.061	ITGB1;NCAM1;EGFR
Integrated cancer pathway	0.000193789	43.4346	415.061	CASP3;AKT1;TP53
Chemokine signaling pathway	0.000195124	13.1031	125.072	PIK3CA;STAT3;CXCR4;AKT1;HRAS
Oncostatin M	0.000203081	9.66344	91.8149	MYC;STAT3;HIF1A;TP53;EGFR;VEGFA
Phospholipids as signaling intermediaries	0.000207769	42.1163	398.866	PIK3CA;AKT1;HRAS
Generation of second messenger molecules	0.000207769	42.1163	398.866	CD4;LCK;PLCG1
Senescence and autophagy	0.000210961	19.9088	188.167	IFNG;HRAS;TP53;INS
EGFR interaction with phospholipase C-gamma	0.000241858	39.7056	369.541	ERBB2;PLCG1;EGFR
ERBB4 signaling events	0.000241858	39.7056	369.541	PIK3CA;ERBB2;FYN
Angiotensin II-mediated activation of JNK pathway via Pyk2-dependent signaling	0.000257613	38.6008	356.231	PLCG1;HRAS;EGFR
Signaling events regulated by Ret tyrosine kinase	0.000257613	38.6008	356.231	PIK3CA;PTPN11;HRAS
E-cadherin nascent AJ-like junctions pathway	0.000257613	38.6008	356.231	PIK3CA;AKT1;CTNNB1
FRS2-mediated cascade	0.000257613	38.6008	356.231	PTPN11;FGF2;HRAS
G alpha i pathway	0.00028799	18.1777	165.659	STAT3;AKT1;HRAS;EGFR
Plasma membrane estrogen receptor signaling	0.000295034	36.5655	331.936	PIK3CA;AKT1;HRAS
ERBB1 internalization pathway	0.000295034	36.5655	331.936	PIK3CA;HRAS;EGFR
Fc epsilon receptor I signaling in mast cells	0.000295034	36.5655	331.936	PIK3CA;PLCG1;HRAS
TWEAK signaling pathway	0.000313694	35.6261	320.826	CASP3;AKT1;CTNNB1
Urokinase-type plasminogen activator (uPA) and uPAR-mediated signaling	0.000313694	35.6261	320.826	ITGB1;ITGAM;EGFR
Netrin-1 signaling	0.000313694	35.6261	320.826	FYN;PTPN11;PLCG1
Cell differentiation by G alpha (i/o) pathway inferred from mouse Neuro2A model	0.000335436	34.7337	310.334	STAT3;AKT1;HRAS
Gastrin pathway	0.000355218	33.8849	300.411	ITGB1;CTNNB1;VEGFA
Heart development	0.000355218	33.8849	300.411	CTNNB1;PTPN11;VEGFA
Binding of RNA by insulin-like growth factor 2 mRNA binding proteins (IGF2BPs/IMPs/VICKZs)	0.000355218	151.121	1337.16	MYC;ACTB
Bystander B cell activation	0.000355218	151.121	1337.16	CD4;CD28
Support of platelet aggregation by Eph kinases and ephrins	0.000355218	151.121	1337.16	ITGB1;FYN
TSP1-induced apoptosis in microvascular endothelial cell	0.000355218	151.121	1337.16	CASP3;FYN
Transcription factor regulation of microRNAs related to cardiac hypertrophy	0.000355218	151.121	1337.16	STAT3;AKT1
Nef-induced signal transduction	0.000355218	151.121	1337.16	LCK;FYN
Immunoregulatory interactions between a lymphoid and a non-lymphoid cell	0.000394992	16.4298	143.573	ITGB1;CD8A;HLA-A;CD34
HES/HEY pathway	0.000444879	30.8667	265.612	CD4;STAT3;HIF1A
Wnt signaling pathway	0.000444879	10.6454	91.5902	SOX2;MYC;AKT1;CTNNB1;TP53
EGFR transactivation by gastrin	0.000444879	129.526	1113.72	HRAS;EGFR
Gene expression regulation by hypoxia-inducible factor	0.000444879	129.526	1113.72	HIF1A;VEGFA
HIV-induced T cell apoptosis	0.000444879	129.526	1113.72	CD4;CD28
Nef-mediated CD4 downregulation	0.000444879	129.526	1113.72	CD4;LCK
Interleukin-1 signaling pathway	0.000465075	15.6104	133.459	PIK3CA;AKT1;PTPN11;PLCG1
Arf6 integrin-mediated signaling pathway	0.000465075	30.1941	257.966	ITGB1;CTNNB1;INS
Ceramide signaling pathway	0.000465075	30.1941	257.966	MYC;AKT1;TNF
Type 2 diabetes mellitus	0.000492262	29.5502	250.684	PIK3CA;TNF;INS
Type I interferon (interferon-alpha/beta) pathway	0.000520393	28.9331	243.741	PTPRC;PTPN11;PTPN6
Netrin mediated repulsion signals	0.000543875	113.33	949.331	FYN;PTPN11
Vitamin B12 metabolism	0.000547603	28.3412	237.116	IFNG;TNF;INS
Tight junction	0.000573653	14.6364	121.653	AKT1;CTNNB1;HRAS;ACTB
Amyotrophic lateral sclerosis (ALS)	0.000573653	27.773	230.789	CASP3;TNF;TP53
PI3K pathway	0.000573653	27.773	230.789	PIK3CA;AKT1;HRAS
Adrenergic pathway	0.000639028	14.1933	116.364	AKT1;PLCG1;HRAS;EGFR
Apoptotic cleavage of cell adhesion proteins	0.000648223	100.732	823.741	CASP3;CTNNB1
Telomerase protein component gene hTERT transcriptional regulation	0.000648223	100.732	823.741	MYC;TP53
Systemic lupus erythematosus	0.000668584	13.9817	113.856	IL10;IFNG;CD28;TNF
Keratinocyte differentiation	0.000697778	25.7106	208.098	TNF;HRAS;EGFR
Mechanism of gene regulation by peroxisome proliferators via PPAR-alpha	0.000697778	25.7106	208.098	PIK3CA;MYC;TNF
Toll-like receptor signaling pathway regulation	0.000718042	13.6756	110.252	PIK3CA;AKT1;PTPN6;TNF
Caspase cascade in apoptosis	0.000767686	24.7899	198.116	CASP3;AKT1;TNF
Selenium pathway	0.000804147	24.3537	193.42	IFNG;TNF;INS
Platelet adhesion to exposed collagen	0.000883394	82.4091	645.352	ITGB1;FYN
Signal regulatory protein (SIRP) family interactions	0.000883394	82.4091	645.352	PTPN11;PTPN6
Downregulation of ERBB2-ERBB3 signaling	0.000883394	82.4091	645.352	ERBB2;AKT1
HIV life cycle early phase	0.000883394	82.4091	645.352	CD4;CXCR4
PI3K class IB pathway	0.000883394	82.4091	645.352	AKT1;HRAS
Signaling by the B cell receptor (BCR)	0.000883394	12.8325	100.461	AKT1;FYN;PLCG1;HRAS
Phagosome	0.000947938	12.574	97.5008	ITGB1;ITGAM;HLA-A;ACTB
Interferon alpha/beta signaling	0.000947938	22.7522	176.368	PTPN11;PTPN6;HLA-A
MAP kinase inactivation of SMRT corepressor	0.0010168	75.5379	580.009	HRAS;EGFR
Endochondral ossification	0.0010312	22.0277	168.757	AKT1;FGF2;VEGFA
cAMP cell motility pathway inferred from amoeba model	0.00107439	21.6824	165.154	AKT1;PLCG1;ACTB
AMPK signaling	0.00111864	21.3478	161.676	PIK3CA;AKT1;TP53
Stress induction of HSP regulation	0.00115678	69.7238	525.491	CASP3;TNF
CDC42 signaling events	0.00120275	20.7084	155.073	PIK3CA;CTNNB1;HRAS
MicroRNA regulation of DNA damage response	0.00120275	20.7084	155.073	CASP3;MYC;TP53
NCAM signaling for neurite out-growth	0.00120275	20.7084	155.073	FYN;NCAM1;HRAS
Rac1 cell motility signaling pathway	0.00124991	20.4029	151.937	PIK3CA;STAT3;CTNNB1
Hypoxia-inducible factor in the cardivascular system	0.00129257	64.7403	479.381	HIF1A;VEGFA
Inhibition of platelet activation by aspirin	0.00129257	64.7403	479.381	ITGB1;HRAS
Alzheimer's disease	0.00129257	11.4222	84.57	CASP3;TNF;GAPDH;TP53
Myc repressed pathway	0.00133915	19.8179	145.969	ITGB1;MYC;ERBB2
Arrhythmogenic right ventricular cardiomyopathy (ARVC)	0.00142236	19.2655	140.378	ITGB1;CTNNB1;ACTB
Activation of BH3-only proteins	0.00142236	60.4212	439.926	AKT1;TP53
Atypical NF-kappaB pathway	0.00142236	60.4212	439.926	PIK3CA;LCK
SHC-related events	0.00142236	60.4212	439.926	HRAS;INS
SHC1 events in EGFR signaling	0.00142236	60.4212	439.926	HRAS;EGFR
Cells and molecules involved in local acute inflammatory response	0.00142236	60.4212	439.926	ITGB1;TNF
Syndecan 3 pathway	0.00142236	60.4212	439.926	FYN;EGFR
NO2-dependent IL-12 pathway in NK cells	0.00142236	60.4212	439.926	CD4;IFNG
Apoptosis regulation	0.00156962	18.4921	132.627	IFNG;CASP3;TP53
Pertussis toxin-insensitive CCR5 signaling in macrophage	0.00156962	56.642	405.821	CXCR4;PLCG1
CBL signaling regulation	0.00156962	56.642	405.821	PIK3CA;FYN
Corticosteroids and cardioprotection	0.00156962	56.642	405.821	PIK3CA;AKT1
Human cytomegalovirus and MAP kinase pathways	0.00156962	56.642	405.821	PIK3CA;AKT1
Nicotinic acetylcholine receptor role in the regulation of apoptosis	0.00156962	56.642	405.821	PIK3CA;AKT1
Cell cycle progression regulation by PLK3	0.00173134	53.3075	376.079	CASP3;TP53
TP53 network	0.00173134	53.3075	376.079	MYC;TP53
FRS2-mediated activation	0.00173134	53.3075	376.079	PLCG1;HRAS
Hypoxic and oxygen homeostasis regulation of HIF-1-alpha	0.00173134	53.3075	376.079	HIF1A;TP53
Platelet homeostasis	0.00177081	17.5523	123.332	PECAM1;PTPN11;PTPN6
SMAD2/3 nuclear pathway	0.00177081	17.5523	123.332	IL10;MYC;AKT1
Skeletal muscle hypertrophy is regulated via AKT/mTOR pathway	0.00187725	50.3434	349.938	PIK3CA;AKT1
Cell differentiation pathway	0.00187725	50.3434	349.938	SOX2;STAT3
Sprouty regulation of tyrosine kinase signals	0.00187725	50.3434	349.938	HRAS;EGFR
Estrogen receptor signaling pathway	0.00187725	50.3434	349.938	PIK3CA;AKT1
Gene expression regulation in pancreatic beta cells	0.00187725	50.3434	349.938	AKT1;INS
Hypertrophy pathway	0.00187725	50.3434	349.938	IFNG;VEGFA
TGF-beta regulation of skeletal system development	0.0019265	16.9075	117.039	IFNG;MYC;TNF
Progesterone-mediated oocyte maturation	0.0019873	16.703	115.056	PIK3CA;AKT1;INS
S1P/S1P1 pathway	0.00205431	47.6914	326.8	PLCG1;VEGFA
AKT signaling pathway	0.00222893	45.3045	306.193	PIK3CA;AKT1
T cell receptor downstream signaling	0.00222893	45.3045	306.193	CD4;LCK
Nephrin interactions	0.00222893	45.3045	306.193	PIK3CA;FYN
Endocytosis	0.00222893	9.55137	64.5495	CXCR4;HLA-A;HRAS;EGFR
Thymic stromal lymphopoietin (TSLP) pathway	0.00222893	15.9318	107.649	IL10;IL4;MYC
Signaling events mediated by the hedgehog family	0.00242671	43.145	287.736	PIK3CA;AKT1
L1CAM interactions	0.00251297	15.2285	100.985	ITGB1;NCAM1;EGFR
Plexin D1 signaling	0.00262888	41.1818	271.12	ITGB1;VEGFA
Phosphoinositides and their downstream targets	0.00282221	39.3893	256.092	AKT1;PLCG1
Alpha-9 beta-1 integrin pathway	0.00282221	39.3893	256.092	ITGB1;VEGFA
Cellular response to hypoxia	0.00282221	39.3893	256.092	HIF1A;VEGFA
Interferon alpha signaling regulation	0.00282221	39.3893	256.092	PTPN11;PTPN6
Granule cell survival pathway	0.00286947	14.4317	93.5496	CASP3;AKT1;PLCG1
Dilated cardiomyopathy	0.00294547	14.2822	92.1684	ITGB1;TNF;ACTB
TNF-alpha signaling pathway	0.00301189	14.1357	90.8197	CASP3;AKT1;TNF
Inhibition of activated T cell apoptosis by neuropeptides VIP and PACAP	0.00301189	37.7462	242.443	MYC;PLCG1
Integrin family cell surface interactions	0.00301189	37.7462	242.443	ITGB1;ITGAM
BAD phosphorylation regulation	0.00321353	36.2345	229.998	PIK3CA;AKT1
eIF4E and p70 S6 kinase regulation	0.00321353	36.2345	229.998	PIK3CA;AKT1
FSH signaling pathway	0.00321353	36.2345	229.998	BDNF;AKT1
Insulin regulation of blood glucose	0.00321353	36.2345	229.998	AKT1;INS
TGF-beta regulation of extracellular matrix	0.00324896	5.20438	32.9639	ITGAM;MYC;FYN;PTPN11;CD34;VEGFA
Sema4D in semaphorin signaling	0.00367689	33.5471	208.155	PTPRC;ERBB2
Skeletal myogenesis control by HDAC and calcium/calmodulin-dependent kinase (CaMK)	0.00367689	33.5471	208.155	PIK3CA;AKT1
Signaling pathway from G-protein families	0.00388255	32.3474	198.526	PLCG1;HRAS
TNFR1 signaling pathway	0.00388255	32.3474	198.526	CASP3;TNF
Tumor necrosis factor (TNF) pathway	0.00388255	32.3474	198.526	CASP3;TNF
p38-alpha and p38-beta regulation	0.00388255	32.3474	198.526	LCK;FYN
Nectin adhesion pathway	0.00388255	32.3474	198.526	PIK3CA;CTNNB1
Pancreatic beta-cell development regulation	0.0043912	30.1879	181.399	AKT1;INS
Alpha-synuclein signaling	0.0043912	30.1879	181.399	LCK;FYN
p53 activity regulation	0.00450415	12.0358	71.9864	CASP3;AKT1;TP53
Signaling by NOTCH	0.00460135	11.9314	71.0767	MYC;HIF1A;TP53
Interleukin-1 regulation of extracellular matrix	0.00469968	11.8289	70.1851	IFNG;FGF2;TNF
HIF-2-alpha transcription factor network	0.00490138	28.2983	166.643	POU5F1;VEGFA
Prion diseases	0.00516436	27.4394	160.01	FYN;NCAM1
Autophagy regulation	0.00516436	27.4394	160.01	IFNG;INS
BDNF signaling pathway	0.00528115	7.29924	42.383	MYC;BIRC5;FGF2;VEGFA
FSH regulation of apoptosis	0.00541395	7.24214	41.8532	BDNF;TP53;ACTB;VEGFA
Signaling to ERKs	0.0054187	26.631	153.813	PLCG1;HRAS
PI3K/AKT activation	0.00570554	25.8688	148.011	PIK3CA;AKT1
FAS pathway and stress induction of heat shock protein regulation	0.0063136	24.4681	137.457	CASP3;TNF
Negative regulation of FGFR signaling	0.00660294	23.823	132.646	PTPN11;FGF2
Nuclear signaling by ErbB4	0.00660294	23.823	132.646	PTPN11;GFAP
Diabetes pathways	0.00663943	10.3193	57.375	MYC;ACTB;INS
FOXM1 transcription factor network	0.00689686	23.211	128.111	MYC;BIRC5
Aldosterone-regulated sodium reabsorption	0.00721315	22.6295	123.831	PIK3CA;INS
Beta-3 integrin cell surface interactions	0.00751659	22.0765	119.785	PECAM1;VEGFA
PI3K class IB pathway in neutrophils	0.00751659	22.0765	119.785	AKT1;HRAS
HNF3B pathway	0.00817629	21.0476	112.328	AKT1;INS
Integrin-linked kinase signaling	0.00817629	21.0476	112.328	AKT1;CTNNB1
EGFR1 pathway	0.00871983	9.27345	48.8714	MYC;EGFR;VEGFA
Agrin in postsynaptic differentiation	0.00881501	20.1101	105.615	ITGB1;EGFR
Regulation of transcription by NOTCH1 intracellular domain	0.00881501	20.1101	105.615	MYC;HIF1A
LKB1 signaling events	0.00881501	20.1101	105.615	MYC;TP53
Presenilin action in Notch and Wnt signaling	0.00916252	19.6719	102.505	MYC;CTNNB1
FoxO family signaling	0.00951535	19.2524	99.545	AKT1;CTNNB1
Type II interferon signaling (interferon-gamma)	0.00987342	18.8504	96.7242	IFNG;PTPN11
Apoptotic execution phase	0.0106306	18.0945	91.4651	CASP3;CTNNB1
Phospholipase C-mediated cascade	0.0113841	17.3969	86.6633	PLCG1;FGF2
RANKL signaling pathway	0.0113841	17.3969	86.6633	AKT1;PLCG1
Basal cell carcinoma	0.01174	17.0678	84.4165	CTNNB1;TP53
Vibrio cholerae infection	0.01174	17.0678	84.4165	PLCG1;ACTB
Inositol phosphate metabolism	0.0125508	16.4455	80.201	PIK3CA;PLCG1
HIV-1 Nef as negative effector of Fas and TNF	0.0129493	16.151	78.2217	CASP3;TNF
Calcium signaling pathway	0.0130258	7.88532	38.1246	ERBB2;PLCG1;EGFR
ATF2 transcription factor network	0.0133207	15.8668	76.3214	IFNG;INS
Androgen receptor proteolysis and transcription regulation	0.014158	15.3274	72.7408	AKT1;CTNNB1
Huntington's disease	0.014158	7.62161	36.1602	BDNF;CASP3;TP53
Shigellosis	0.0145544	15.0712	71.0526	ITGB1;ACTB
Proteasome degradation	0.0149746	14.8234	69.4277	IFNG;HLA-A
Endothelins	0.015399	14.5836	67.8626	AKT1;HRAS
Beta-1 integrin cell surface interactions	0.0162986	14.1264	64.9002	ITGB1;VEGFA
SIDS susceptibility pathways	0.0166977	13.9084	63.4973	IL10;TNF
G1 to S cell cycle control	0.0166977	13.9084	63.4973	MYC;TP53
Signaling events mediated by HDAC class I	0.0179122	13.2928	59.5716	STAT3;TNF
Activation of NOXA and translocation to mitochondria	0.0179122	110.833	495.416	TP53
Activation of RAS in B cells	0.0179122	110.833	495.416	HRAS
Polo-like kinase 3 (PLK3) pathway	0.0179122	110.833	495.416	TP53
FGFR1b ligand binding and activation	0.0179122	110.833	495.416	FGF2
GRB7 events in ERBB2 signaling	0.0179122	110.833	495.416	ERBB2
Insulin receptor substrate (IRS) activation	0.0179122	110.833	495.416	INS
Ion channel and phorbal esters signaling pathway	0.0179122	110.833	495.416	PLCG1
Kit receptor transcriptional targets	0.0179122	110.833	495.416	VEGFA
Neurophilin interactions with VEGF and VEGF receptor	0.0179122	110.833	495.416	VEGFA
Neuroregulin receptor degredation protein-1 controls ErbB3 receptor recycling	0.0179122	110.833	495.416	EGFR
Gastrin-CREB signaling pathway via PKC and MAPK	0.0184354	6.78806	30.1313	PIK3CA;HRAS;EGFR
Myocyte adrenergic pathway	0.018601	12.9117	57.1686	AKT1;HRAS
Signaling by NOTCH1	0.0190114	12.7292	56.0254	MYC;HIF1A
Degradation of beta-catenin by the destruction complex	0.0190114	12.7292	56.0254	CD4;CTNNB1
RANKL regulation of apoptosis and immune response	0.0194239	12.5518	54.9188	MKI67;TNF
Seven transmembrane receptor signaling through beta-arrestin	0.0194239	12.5518	54.9188	AKT1;ACTB
Mitochondrial pathway of apoptosis: caspases	0.0209018	12.0479	51.8026	CASP3;BIRC5
Signaling by EGFR	0.0209018	88.6622	380.247	EGFR
Fas signaling pathway in hepatocytes	0.0209018	88.6622	380.247	EGFR
G beta-gamma signaling through PI3K gamma	0.0209018	88.6622	380.247	AKT1
MSP/RON receptor signaling pathway	0.0209018	88.6622	380.247	TNF
NADE-dependent death signaling	0.0209018	88.6622	380.247	CASP3
Phosphatidylinositol signaling system	0.0211396	11.8888	50.8268	PIK3CA;PLCG1
Apoptosis modulation and signaling	0.022083	11.5828	48.962	CASP3;BIRC5
Nuclear beta-catenin signaling and target gene transcription regulation	0.022083	11.5828	48.962	MYC;CTNNB1
MAP kinase signaling pathway	0.0225598	11.4356	48.0704	MYC;HRAS
Response to elevated platelet cytosolic calcium	0.0235745	11.1521	46.3638	PECAM1;VEGFA
Apoptotic factor-mediated response	0.0237005	73.8815	305.551	CASP3
BAD activation and translocation to mitochondria	0.0237005	73.8815	305.551	AKT1
Endothelial NOS activation	0.0237005	73.8815	305.551	AKT1
FYVE-finger proteins in vesicle transport	0.0237005	73.8815	305.551	EGFR
Fas signaling pathway in cardiomyocytes	0.0237005	73.8815	305.551	AKT1
MEK activation	0.0237005	73.8815	305.551	HRAS
Negative regulation of the PI3K/Akt network	0.0237005	73.8815	305.551	AKT1
Cell junction organization	0.0237005	11.0155	45.5466	ITGB1;CTNNB1
Gap junction pathway	0.0268579	10.2614	41.0934	HRAS;EGFR
CHL1 interactions	0.0268579	63.3238	253.503	ITGB1
Visceral fat deposits and the metabolic syndrome	0.0268579	63.3238	253.503	TNF
AKT phosphorylation of nuclear targets	0.029613	55.4056	215.341	AKT1
Alpha defensins	0.029613	55.4056	215.341	CD4
Alpha-4 beta-7 integrin signaling	0.029613	55.4056	215.341	ITGB1
Endosomal/vacuolar pathway	0.029613	55.4056	215.341	HLA-A
West Nile virus infection	0.029613	55.4056	215.341	CASP3
cAMP receptor, G-protein-independent pathways inferred from amoeba model	0.029613	55.4056	215.341	STAT3
Folding of actin by CCT/TriC	0.029613	55.4056	215.341	ACTB
Inhibition of matrix metalloproteinases	0.029613	55.4056	215.341	HRAS
PI3K/AKT signalling	0.029613	55.4056	215.341	AKT1
TSH regulation of gene expression	0.0301586	9.50191	36.7172	MYC;VEGFA
Mitochondrial pathway of apoptosis: BH3-only Bcl-2 family	0.0301586	9.50191	36.7172	AKT1;HIF1A
Downstream signaling events Of B cell receptor (BCR)	0.0306784	9.40246	36.1526	AKT1;HRAS
GnRH signaling pathway	0.0320615	9.11616	34.5388	HRAS;EGFR
Melanogenesis	0.0320615	9.11616	34.5388	CTNNB1;HRAS
Apoptotic DNA fragmentation and tissue homeostasis	0.0320615	49.2469	186.271	CASP3
Second messenger role in netrin-1 signaling	0.0320615	49.2469	186.271	PLCG1
Splicing regulation through Sam68	0.0320615	49.2469	186.271	HRAS
DCC role in regulating apoptosis	0.0320615	49.2469	186.271	CASP3
Tetrahydrobiopterin (BH4) biosynthesis, recycling, salvage and regulation	0.0320615	49.2469	186.271	AKT1
Free radical-induced apoptosis	0.0320615	49.2469	186.271	TNF
Nef-mediated downregulation of MHC class I complex cell surface expression	0.0320615	49.2469	186.271	HLA-A
B lymphocyte cell surface molecules	0.0348723	44.32	163.461	PTPRC
BTG family proteins and cell cycle regulation	0.0348723	44.32	163.461	TP53
Signaling by VEGF	0.0348723	44.32	163.461	VEGFA
Signaling by activated point mutants of FGFR1	0.0348723	44.32	163.461	FGF2
Erythropoietin-mediated neuroprotection through NF-kB	0.0348723	44.32	163.461	HIF1A
SODD/TNFR1 signaling pathway	0.0376198	40.2889	145.133	TNF
Caspase-mediated cleavage of cytoskeletal proteins	0.0376198	40.2889	145.133	CASP3
D4-GDI signaling pathway	0.0376198	40.2889	145.133	CASP3
FGFR3 ligand binding and activation	0.0376198	40.2889	145.133	FGF2
Granzyme A-mediated apoptosis pathway	0.0376198	40.2889	145.133	CASP3
Activation of DNA fragmentation factor	0.0398328	36.9296	130.117	CASP3
Signal attenuation	0.0398328	36.9296	130.117	INS
CBL-mediated ligand-induced downregulation of EGF receptors	0.0398328	36.9296	130.117	EGFR
CTL mediated immune response against target cells	0.0398328	36.9296	130.117	HLA-A
Death receptor signaling	0.0398328	36.9296	130.117	TNF
Double stranded RNA-induced gene expression	0.0398328	36.9296	130.117	TP53
FGFR4 ligand binding and activation	0.0398328	36.9296	130.117	FGF2
Interleukin-22 soluble receptor signaling pathway	0.0398328	36.9296	130.117	STAT3
Keap1-Nrf2 pathway	0.0398328	36.9296	130.117	PIK3CA
MAP kinase downregulation by phosphorylation of MEK1 by Cdk5/p35	0.0398328	36.9296	130.117	HRAS
Melanocyte development and pigmentation pathway	0.0398328	36.9296	130.117	HRAS
HIV life cycle	0.040666	7.77351	27.213	CD4;CXCR4
AKT phosphorylation of cytosolic targets	0.0423516	34.0872	117.614	AKT1
S1P/S1P4 pathway	0.0423516	34.0872	117.614	PLCG1
Sema3A-plexin repulsion signaling by inhibiting integrin adhesion	0.0423516	34.0872	117.614	FYN
T cell receptor/Ras pathway	0.0423516	34.0872	117.614	HRAS
DCC-mediated attractive signaling	0.0423516	34.0872	117.614	FYN
Integration of energy metabolism	0.0446739	7.32853	24.881	CTNNB1;INS
Prolactin receptor signaling pathway	0.0448059	31.6508	107.06	PTPN11
Sema3A/PAK-dependent axon repulsion	0.0448059	31.6508	107.06	FYN
Calcium signaling by HBx of hepatitis B virus	0.0448059	31.6508	107.06	HRAS
Signaling to p38 via RIT and RIN	0.0448059	31.6508	107.06	HRAS
Mu-calpain pathway	0.0448059	31.6508	107.06	ITGB1
Acetylation and deacetylation of RelA in the nucleus	0.0468437	29.5393	98.044	TNF
Rb tumor suppressor/checkpoint signaling in response to DNA damage	0.0468437	29.5393	98.044	TP53
CRMPs in Sema3A signaling	0.0468437	29.5393	98.044	FYN
Cell-extracellular matrix interactions	0.0468437	29.5393	98.044	ITGB1
Sprouty regulation of FGF signaling	0.0468437	29.5393	98.044	PTPN11
Control of cell cycle and breast tumor growth by estrogen-responsive protein Efp	0.0468437	29.5393	98.044	TP53
Ghrelin biosynthesis, secretion, and deacylation	0.0468437	29.5393	98.044	INS
Interleukin-9 signaling pathway	0.0468437	29.5393	98.044	STAT3
Other semaphorin interactions	0.0468437	29.5393	98.044	ITGB1
PI3K subunit p85 role in regulation of actin organization and cell migration	0.0468437	29.5393	98.044	PIK3CA
Apoptotic cleavage of cellular proteins	0.0489806	27.6917	90.2638	CASP3
Beta-arrestin-dependent recruitment of Src kinases in GPCR signaling	0.0489806	27.6917	90.2638	HRAS
Beta-catenin phosphorylation cascade	0.0489806	27.6917	90.2638	CTNNB1
Chromatin remodeling by hSWI/SNF ATP-dependent complexes	0.0489806	27.6917	90.2638	ACTB
Synaptic proteins at the synaptic junction	0.0489806	27.6917	90.2638	NCAM1
Destabilization of mRNA by KSRP	0.0489806	27.6917	90.2638	AKT1
Ion channel function in vascular endothelium	0.0489806	27.6917	90.2638	AKT1
Nitric oxide metabolism	0.0489806	27.6917	90.2638	AKT1
TNF-alpha effects on cytokine activity, cell motility, and apoptosis	0.0491179	6.77409	22.0494	TNF;IL2
Downregulation of MTA-3 in ER-negative breast tumors	0.0514991	26.0614	83.4895	GAPDH
Effect of METS on macrophage differentiation	0.0514991	26.0614	83.4895	HRAS
p53 signaling pathway	0.0514991	6.57498	21.0537	TP53;EGFR
Apoptosis modulation by HSP70	0.0536293	24.6123	77.544	CASP3
Ras activation upon calcium influx through NMDA receptor	0.0536293	24.6123	77.544	HRAS
STAT3 pathway	0.0536293	24.6123	77.544	STAT3
Calcineurin in effects in keratinocyte differentiation	0.0536293	24.6123	77.544	PLCG1
Destabilization of mRNA by butyrate response factor 1 (BRF1)	0.0536293	24.6123	77.544	AKT1
MAL role in Rho-mediated activation of SRF	0.0536293	24.6123	77.544	HRAS
Signaling by Hippo	0.0560835	23.3158	72.2892	CASP3
GATA3-mediated activation of Th2 cytokine expression	0.0560835	23.3158	72.2892	IL4
Interleukin-3 regulation of hematopoietic cells	0.0560835	23.3158	72.2892	TNF
Prion pathway	0.0586102	22.1489	67.6154	GFAP
Mitochondrial role in apoptotic signaling	0.0586102	22.1489	67.6154	CASP3
BRCA1, BRCA2 and ATR roles in cancer susceptibility	0.0609525	21.0931	63.4348	TP53
CCR3 signaling in eosinophils	0.0609525	21.0931	63.4348	HRAS
Epstein-Barr virus LMP1 signaling	0.0609525	21.0931	63.4348	TNF
Myometrial relaxation and contraction pathways	0.0609525	5.88265	17.6857	PLCG1;ACTB
Progesterone-initiated oocyte maturation	0.0630286	20.1333	59.6759	HRAS
Signaling events mediated by PRL	0.0630286	20.1333	59.6759	ITGB1
FGFR ligand binding and activation	0.0630286	20.1333	59.6759	FGF2
Incretin biosynthesis, secretion, and inactivation	0.0630286	20.1333	59.6759	CTNNB1
Interleukin-11 pathway	0.0630286	20.1333	59.6759	BIRC5
SREBP signaling	0.0652337	19.257	56.2803	INS
Signal transduction of S1P receptor	0.0652337	19.257	56.2803	AKT1
Dorso-ventral axis formation	0.0652337	19.257	56.2803	EGFR
NF-kappaB signaling pathway	0.0652337	19.257	56.2803	TNF
Basigin interactions	0.0674021	18.4537	53.1999	ITGB1
C-Myc pathway	0.0674021	18.4537	53.1999	MYC
Corticotropin releasing hormone pathway	0.0674021	18.4537	53.1999	IL2
Maturity onset diabetes of the young	0.0674021	18.4537	53.1999	INS
Physiological and pathological hypertrophy of the heart	0.0694143	17.7147	50.3943	STAT3
RXR/VDR pathway	0.0694143	17.7147	50.3943	TNF
Segmentation clock	0.0694143	17.7147	50.3943	CTNNB1
Fibroblast growth factor 1	0.0694143	17.7147	50.3943	VEGFA
Interleukin-9 regulation of target genes	0.0694143	17.7147	50.3943	MYC
Proteins and DNA sequences in cardicac structures	0.0711421	17.0325	47.8299	PTPN11
Cell cycle: G2/M checkpoint	0.0711421	17.0325	47.8299	TP53
Cooperation of prefoldin and TriC/CCT in actin and tubulin folding	0.0711421	17.0325	47.8299	ACTB
TNF/stress-related signaling	0.0711421	17.0325	47.8299	TNF
TWEAK regulation of gene expression	0.0711421	17.0325	47.8299	TNF
EGFR downregulation	0.0711421	17.0325	47.8299	EGFR
Glycolysis	0.0711421	17.0325	47.8299	GAPDH
Cell cycle: G1/S checkpoint	0.0731942	16.4008	45.4779	TP53
TRAIL signaling pathway	0.0731942	16.4008	45.4779	PIK3CA
G-protein beta-gamma signalling	0.0731942	16.4008	45.4779	AKT1
Multi-step regulation of transcription by PITX2	0.0731942	16.4008	45.4779	CTNNB1
Adherens junction actin cytoskeletal organization	0.0749602	15.8143	43.3142	CTNNB1
BARD1 signaling events	0.0749602	15.8143	43.3142	TP53
CDO in myogenesis	0.0749602	15.8143	43.3142	CTNNB1
Transferrin endocytosis and recycling	0.0749602	15.8143	43.3142	INS
Integrin beta-2 pathway	0.0749602	15.8143	43.3142	ITGAM
Matrix metalloproteinases	0.0749602	15.8143	43.3142	TNF
Retinoic acid receptor-mediated signaling	0.0770701	15.2682	41.3179	AKT1
CDC42 activity regulation	0.0770701	15.2682	41.3179	PLCG1
Interferon-beta enhancer pathway	0.0770701	15.2682	41.3179	ACTB
Alpha-V beta-3 integrin/OPN pathway	0.0790218	14.7585	39.4712	PIK3CA
Ras family activation regulation	0.0790218	14.7585	39.4712	HRAS
Gluconeogenesis	0.0790218	14.7585	39.4712	GAPDH
NF-kappaB activation by non-typeable Hemophilus influenzae	0.0790218	14.7585	39.4712	TNF
Serotonin HTR1 group and FOS pathway	0.0813449	14.2817	37.7585	PIK3CA
Signaling by GPCR	0.0828219	2.38156	6.24965	PIK3CA;CXCR4;AKT1;HRAS;EGFR
Fluoropyrimidine activity	0.0833788	13.8347	36.1664	TP53
PIP biosynthesis at the plasma membrane	0.0833788	13.8347	36.1664	PIK3CA
TOR signaling	0.0851076	13.4148	34.6831	AKT1
Induction of apoptosis through DR3 and DR4/5 death receptors	0.0851076	13.4148	34.6831	CASP3
Interleukin-7 interactions in immune response	0.0851076	13.4148	34.6831	IL2
MAPK/TRK pathway	0.0851076	13.4148	34.6831	HRAS
Monoamine transport	0.0851076	13.4148	34.6831	TNF
Arf6 signal transduction regulation	0.0870857	13.0196	33.2984	EGFR
fMLP induced chemokine gene expression in HMC-1 cells	0.0870857	13.0196	33.2984	HRAS
PIK3C1/AKT pathway	0.0870857	13.0196	33.2984	AKT1
ALK in cardiac myocytes	0.0914109	12.2951	30.7895	CTNNB1
Activation of NMDA receptor upon glutamate binding and postsynaptic events	0.0914109	12.2951	30.7895	HRAS
Platelet aggregation (plug formation)	0.0914109	12.2951	30.7895	AKT1
Signal transduction through IL-1R	0.0934741	11.9622	29.6501	TNF
p38 alpha/beta MAPK downstream pathway	0.0934741	11.9622	29.6501	TP53
Cell cycle	0.0953652	3.02388	7.42478	MYC;BIRC5;TP53
Aurora B signaling	0.0953652	11.6468	28.5788	BIRC5
G13 signaling pathway	0.0953652	11.6468	28.5788	PIK3CA
PAC1 receptor pathway	0.0975451	11.3476	27.5699	PLCG1
Transcriptional activity of SMAD2/SMAD3-SMAD4 heterotrimer	0.0995531	11.0633	26.6184	MYC
Insulin biosynthesis and processing	0.0995531	11.0633	26.6184	INS
HNF3A pathway	0.106143	10.2899	24.0652	INS
NCAM1 interactions	0.106143	10.2899	24.0652	NCAM1
RhoA signaling pathway	0.107918	10.0556	23.3023	ITGB1
Defensins	0.107918	10.0556	23.3023	CD4
Wnt interactions in lipid metabolism and immune response	0.107918	10.0556	23.3023	MYC
ATM pathway	0.114549	9.41229	21.2354	TP53
G alpha 12 pathway	0.116621	9.21574	20.6122	HRAS
Phosphatidylinositol metabolism	0.118682	9.02721	20.0181	PIK3CA
Amyloids	0.120731	8.84622	19.4514	INS
Protein folding	0.124598	8.50513	18.393	ACTB
Thrombin signaling through protease-activated receptors	0.124598	8.50513	18.393	PIK3CA
JNK/MAPK pathway	0.124598	8.50513	18.393	TP53
Binding of chemokines to chemokine receptors	0.12661	8.34423	17.8983	CXCR4
Calcineurin-dependent NFAT signaling role in lymphocytes	0.128611	8.1893	17.4248	CASP3
Pre-NOTCH expression and processing	0.132786	7.89603	16.5362	TP53
Glucose metabolism	0.141258	7.36815	14.9635	GAPDH
Circadian rhythm	0.143192	7.24699	14.6076	HIF1A
Angiotensin II-stimulated signaling through G-proteins and beta-arrestin	0.147027	7.01623	13.9351	PLCG1
Validated nuclear estrogen receptor alpha network	0.147027	7.01623	13.9351	MYC
Signaling by TGF-beta receptor complex	0.151054	6.79966	13.3107	MYC
G alpha 13 pathway	0.152937	6.6963	13.0151	AKT1
Antiviral mechanism by interferon-stimulated genes	0.158278	6.40419	12.1879	PLCG1
G alpha q pathway	0.158278	6.40419	12.1879	AKT1
Long-term depression	0.158278	6.40419	12.1879	HRAS
Long-term potentiation	0.158278	6.40419	12.1879	HRAS
RIG-I-like receptor signaling pathway	0.159871	6.31238	11.9306	TNF
Mitochondrial pathway of apoptosis: multidomain Bcl-2 family	0.159871	6.31238	11.9306	TP53
Cyclin A-Cdk2-associated events at S phase entry	0.161697	6.22316	11.6818	MYC
E2F transcription factor network	0.165066	6.05205	11.2081	MYC
Wnt/calcium/cyclic GMP pathway	0.165066	6.05205	11.2081	PLCG1
Gastric acid secretion	0.165066	6.05205	11.2081	ACTB
Glycolysis and gluconeogenesis	0.166858	5.96997	10.9825	GAPDH
Transcriptional regulation of white adipocyte differentiation	0.170414	5.81228	10.5522	TNF
G alpha (12/13) signaling events	0.170414	5.81228	10.5522	PIK3CA
Metabolism	0.17121	1.71022	3.09433	PIK3CA;AKT1;CTNNB1;PLCG1;GAPDH;INS
Antigen processing: cross presentation	0.173667	5.66268	10.1478	HLA-A
p73 transcription factor network	0.173667	5.66268	10.1478	MYC
ECM-receptor interaction	0.183373	5.32021	9.23668	ITGB1
NOD signaling pathway	0.185074	5.25661	9.0698	TNF
mRNA stability regulation by proteins that bind AU-rich elements	0.186766	5.19451	8.90756	AKT1
HIF-1 degradation in normoxia	0.190406	5.07458	8.59634	HIF1A
G-protein signaling pathways	0.203682	4.69504	7.62988	HRAS
M phase pathway	0.205295	4.64538	7.5056	BIRC5
S phase	0.235033	3.97257	5.87518	MYC
Oocyte meiosis	0.236522	3.9369	5.7917	INS
Cell cycle checkpoints	0.243473	3.80038	5.4751	TP53
Factors involved in megakaryocyte development and platelet production	0.257501	3.55376	4.91544	TP53
Parkinson's disease	0.267725	3.38872	4.55017	CASP3
Mitotic G1-G1/S phases	0.274309	3.2869	4.32872	MYC
Interleukin-5 regulation of apoptosis	0.289358	3.07863	3.88545	HIF1A
Transmission across chemical synapses	0.363063	2.32393	2.40219	HRAS
Peptide G-protein coupled receptors	0.365573	2.29936	2.35756	CXCR4
G alpha (i) signaling events	0.375571	2.21728	2.2103	CXCR4
Phospholipid metabolism	0.383905	2.15142	2.09426	PIK3CA
DNA replication	0.386271	2.13031	2.05749	BIRC5
Carbohydrate metabolism	0.425309	1.87274	1.62567	GAPDH
Class A GPCRs (rhodopsin-like)	0.448807	1.73739	1.41219	CXCR4
Antigen presentation: folding, assembly, and peptide loading of class I MHC proteins	0.450766	1.72353	1.3909	HLA-A
Neuronal system	0.48545	1.5502	1.13383	HRAS
Innate immune system	0.52692	1.37219	0.889148	CD4
Generic transcription pathway	0.587112	1.15709	0.622924	MYC
GPCR ligand binding	0.617442	1.06194	0.516663	CXCR4
Protein metabolism	0.644565	0.98327	0.434686	ACTB
Gene expression	0.660407	0.893469	0.371995	MYC;AKT1
Lipid and lipoprotein metabolism	0.680173	0.88643	0.341638	PIK3CA
